# Supplementary material for: Risk factors of self-reported physical child abuse during the COVID-19 pandemic in Japan: work-related changes in men and fear of COVID-19 in women
Source: PeerJ. 2023 May 8;11:e15346. doi: 10.7717/peerj.15346 (PMC10174052; doi:10.7717/peerj.15346)
Supplement: Supplemental Information 1 [file peerj-11-15346-s001.xlsx]

## Sheet: raw data
within a year, work decreased (1) vs no (2) vs not applicable (3)	within a year, you experienced leave of absence or furlough (1) vs no (2) vs not applicable (3)	within a year, you resigned (1) vs no (2) vs not applicable (3)	do you think the relationships with your family is good, extremely (1) vs pretty (2) vs a little (3) vs no (4)	tendency of work from home, none (1) vs 1 day/month (2) vs 2-3 days/month (3) vs 1 day/week (4) vs 2-3 days/week (5) vs 4-5 days/week (6) vs 6-7 days/week (7)	in the past two months, you used violence to your child aged 0-14 years (1) vs no (2) vs not sure (3) vs not want to answer (4)	in a year, you infected with COVID-19 (1) vs no (0)	over a year ago, you infected with COVID-19 (1) vs no (0)	you have not infected with COVID-19 (1) vs yes (0)	in a year, you infected with COVID-19 and received oxygen administration (1) vs no (0)	over a year ago, you infected with COVID-19 and received oxygen administration (1) vs no (0)	you have not infected with COVID-19 or received oxygen administration (1) vs yes (0)	in a year, you infected with COVID-19 and recuperated in an accommodation (1) vs no (0)	over a year ago, you infected with COVID-19 and recuperated in an accommodation (1) vs no (0)	you have not infected with COVID-19 or recuperated in an accommodation (1) vs yes (0)	in a year, you infected with COVID-19 and was hospitalized (1) vs no (0)	over a year ago, you infected with COVID-19 and was hospitalized (1) vs no (0)	you have not infected with COVID-19 or been hospitalized (1) vs yes (0)	in a year, your household member infected with COVID-19 (1) vs no (0)	over a year ago, your household member infected with COVID-19 (1) vs no (0)	your household member have not infected with COVID-19 (1) vs yes (0)	in a year, your household member infected with COVID-19 and received oxygen administration (1) vs no (0)	over a year ago, your household member infected with COVID-19 and received oxygen administration (1) vs no (0)	your household member have not infected with COVID-19 or received oxygen administration (1) vs yes (0)	in a year, your household member infected with COVID-19 and was hospitalized (1) vs no (0)	over a year ago, your household member infected with COVID-19 and was hospitalized (1) vs no (0)	your household member have not infected with COVID-19 or been hospitalized (1) vs yes (0)	in the past two months,you felt discriminated related to COVID-19, yes for the first time (1) vs yes from before (2) vs no but I felt before (3) vs not at all (4)	Women have family responsibilities, so you feel bad leaving them other works with much responsibility: not at all (1) vs I do not think so (2) vs I do not think so very much (3) vs I think so a little (4) vs I think so (5) vs I think so pretty much (6)	Considering physical strength, it is better for men to be in charge of jobs that are voluminous and time-consuming: not at all (1) vs I do not think so (2) vs I do not think so very much (3) vs I think so a little (4) vs I think so (5) vs I think so pretty much (6)	Women do not have much social experience and should be supported by experienced men: not at all (1) vs I do not think so (2) vs I do not think so very much (3) vs I think so a little (4) vs I think so (5) vs I think so pretty much (6)	Men are able to play an active role due to the support of women behind the scenes: not at all (1) vs I do not think so (2) vs I do not think so very much (3) vs I think so a little (4) vs I think so (5) vs I think so pretty much (6)	Men are no match for women when it comes to raising children: not at all (1) vs I do not think so (2) vs I do not think so very much (3) vs I think so a little (4) vs I think so (5) vs I think so pretty much (6)	Women are more compassionate toward vulnerable populations than men: not at all (1) vs I do not think so (2) vs I do not think so very much (3) vs I think so a little (4) vs I think so (5) vs I think so pretty much (6)	People who do not have intimate relationships with the opposite sex, such as love or marriage, are not really happy: not at all (1) vs I do not think so (2) vs I do not think so very much (3) vs I think so a little (4) vs I think so (5) vs I think so pretty much (6)	Men who are successful in business but not in love or marriage with women are missing something: not at all (1) vs I do not think so (2) vs I do not think so very much (3) vs I think so a little (4) vs I think so (5) vs I think so pretty much (6)	you are afraid of COVID-19 seriously, not at all (1) vs not applicable (2) vs neither yes nor no (3) vs applicable (4) vs very applicable (5)	you feel uncomfortable just thinking of COVID-19, not at all (1) vs not applicable (2) vs neither yes nor no (3) vs applicable (4) vs very applicable (5)	you sweat just thinking of COVID-19, not at all (1) vs not applicable (2) vs neither yes nor no (3) vs applicable (4) vs very applicable (5)	you are afraid of death by COVID-19, not at all (1) vs not applicable (2) vs neither yes nor no (3) vs applicable (4) vs very applicable (5)	you feel nervous and anxious when you see some news about COVID-19 in the Internet, not at all (1) vs not applicable (2) vs neither yes nor no (3) vs applicable (4) vs very applicable (5)	anxiety about COVID-19 keeps you awake, not at all (1) vs not applicable (2) vs neither yes nor no (3) vs applicable (4) vs very applicable (5)	you get palpitations just thinking of COVID-19, not at all (1) vs not applicable (2) vs neither yes nor no (3) vs applicable (4) vs very applicable (5)	status of COVID-19 vaccination, twice (1) vs once, and wainting for the next (2) vs once, and not waiting for the next (3) vs once, and the vaccine was for one vaccination (4) vs want to, but cannot due to the reason of diseases and allergy (5) vs waiting for the first vaccination (6) vs want to depending on the situation (7) vs not want to (8)	not want to receive vaccination, because you have no time (1) vs other reasons (0)	not want to receive vaccination, because you worry about the side effects (1) vs other reasons (0)	not want to receive vaccination, because you think the vaccination does not work well (1) vs other reasons (0)	not want to receive vaccination, because you worry about acute pain and anaphyraxis (1) vs other reasons (0)	not want to receive vaccination, because you worry about death by vaccination (1) vs other reasons (0)	not want to receive vaccination, because the lomg-term side effects of the vaccine were not revealed yet (1) vs other reasons (0)
3	3	3	3		2	0	0	1	0	0	1	0	0	1	0	0	1	0	0	1	0	0	1	0	0	1	4	3	4	3	4	4	4	2	2	3	2	1	2	3	1	1	7	0	0	0	0	0	0
2	2	2	3	1	2	0	0	1	0	0	1	0	0	1	0	0	1	0	0	1	0	0	1	0	0	1	4	4	4	4	4	4	5	4	4	3	3	3	3	3	3	3	2
3	3	3	3		1	0	0	1	0	0	1	0	0	1	0	0	1	0	0	1	0	0	1	0	0	1	4	4	3	1	5	4	4	3	3	3	3	2	2	3	1	3	7	0	1	0	0	0	1
1	1	2	1	1	2	0	0	1	0	0	1	0	0	1	0	0	1	1	0	0	0	0	1	0	0	1	4	6	6	3	6	4	3	3	3	1	3	1	1	1	1	1	1
3	3	3	1		2	0	0	1	0	0	1	0	0	1	0	0	1	0	0	1	0	0	1	0	0	1	4	1	3	3	3	3	3	3	3	1	1	1	1	1	1	1	8	0	1	1	1	1	1
1	2	2	1	7	2	0	0	1	0	0	1	0	0	1	0	0	1	0	0	1	0	0	1	0	0	1	4	2	4	3	4	4	4	4	4	4	4	1	4	4	1	1	1
2	2	2	1	1	2	0	0	1	0	0	1	0	0	1	0	0	1	0	0	1	0	0	1	0	0	1	4	4	4	3	4	5	1	6	6	4	3	1	3	1	1	1	1
2	2	2	2	4	2	0	0	1	0	0	1	0	0	1	0	0	1	0	0	1	0	0	1	0	0	1	4	3	3	3	3	3	3	3	3	3	3	3	3	3	3	3	1
2	1	2	2	1	2	0	0	1	0	0	1	0	0	1	0	0	1	0	0	1	0	0	1	0	0	1	4	1	2	1	1	4	1	2	1	4	4	1	3	4	1	1	1
2	2	2	1	1	2	0	0	1	0	0	1	0	0	1	0	0	1	0	0	1	0	0	1	0	0	1	4	3	3	4	4	4	5	3	4	3	2	1	3	2	1	1	1
1	3	3	3	1	2	0	0	1	0	0	1	0	0	1	0	0	1	0	0	1	0	0	1	0	0	1	4	4	6	4	4	5	5	4	3	1	1	1	1	1	1	1	1
2	3	3	1		2	0	0	1	0	0	1	0	0	1	0	0	1	0	0	1	0	0	1	0	0	1	4	3	3	3	4	4	3	3	4	5	3	1	4	3	1	1	5
2	2	2	3	1	2	0	0	1	0	0	1	0	0	1	0	0	1	0	0	1	0	0	1	0	0	1	4	3	4	3	4	4	4	3	3	4	4	2	3	4	2	2	1
2	2	2	2	1	2	0	0	1	0	0	1	0	0	1	0	0	1	0	0	1	0	0	1	0	0	1	4	1	4	4	1	2	2	2	2	5	4	2	2	2	2	2	1
1	2	2	3	3	2	0	0	1	0	0	1	0	0	1	0	0	1	0	0	1	0	0	1	0	0	1	4	3	4	2	3	4	2	4	6	3	3	3	3	3	3	3	7	0	0	0	0	0	0
3	3	3	3		2	0	0	1	0	0	1	0	0	1	0	0	1	0	0	1	0	0	1	0	0	1	4	4	4	4	4	4	4	4	4	4	4	4	4	4	4	4	1
2	2	2	3	1	2	0	0	1	0	0	1	0	0	1	0	0	1	0	0	1	0	0	1	0	0	1	4	3	3	3	3	3	3	3	3	4	4	2	3	3	2	2	2
3	3	3	3		1	0	0	1	0	0	1	0	0	1	0	0	1	0	0	1	0	0	1	0	0	1	4	2	3	3	4	3	3	3	3	4	5	2	4	4	2	2	2
2	2	2	4	7	2	0	0	1	0	0	1	0	0	1	0	0	1	0	0	1	0	0	1	0	0	1	4	5	3	2	5	2	3	3	4	4	2	3	3	3	4	3	1
1	2	2	1	1	2	0	0	1	0	0	1	0	0	1	0	0	1	0	0	1	0	0	1	0	0	1	4	1	1	1	1	1	1	1	1	4	2	1	1	1	1	1	1
2	2	2	2	1	2	0	0	1	0	0	1	0	0	1	0	0	1	0	0	1	0	0	1	0	0	1	4	1	2	3	2	4	4	4	5	4	4	1	4	4	1	1	1
2	2	2	2	1	2	0	0	1	0	0	1	0	0	1	0	0	1	0	0	1	0	0	1	0	0	1	4	2	2	2	4	2	2	2	2	3	3	3	3	3	3	3	1
3	3	3	2		2	0	0	1	0	0	1	0	0	1	0	0	1	0	0	1	0	0	1	0	0	1	3	1	3	1	1	2	1	1	1	5	2	1	4	1	1	1	1
1	2	2	3	4	2	0	0	1	0	0	1	0	0	1	0	0	1	0	0	1	0	0	1	0	0	1	4	3	4	3	4	4	3	4	4	3	4	1	2	2	1	1	1
2	1	2	3	1	2	0	0	1	0	0	1	0	0	1	0	0	1	0	0	1	0	0	1	0	0	1	4	4	4	4	4	2	2	1	1	3	2	1	1	1	1	1	1
2	2	2	2	1	2	0	0	1	0	0	1	0	0	1	0	0	1	0	0	1	0	0	1	0	0	1	4	2	4	1	1	4	3	3	3	4	2	2	2	2	1	1	2
2	2	2	1	1	2	0	0	1	0	0	1	0	0	1	0	0	1	0	0	1	0	0	1	0	0	1	4	1	1	1	1	1	1	1	1	4	4	2	1	1	1	1	1
2	2	2	1	1	2	0	0	1	0	0	1	0	0	1	0	0	1	0	0	1	0	0	1	0	0	1	4	1	4	1	1	4	4	3	2	5	4	1	4	4	1	1	1
2	2	2	1	1	2	0	0	1	0	0	1	0	0	1	0	0	1	0	0	1	0	0	1	0	0	1	4	3	4	3	4	4	3	3	4	4	3	2	2	2	1	1	1
2	2	2	3	1	2	0	0	1	0	0	1	0	0	1	0	0	1	0	0	1	0	0	1	0	0	1	4	2	3	3	4	3	3	3	4	2	2	2	2	2	2	2	1
2	2	2	1	4	2	0	0	1	0	0	1	0	0	1	0	0	1	0	0	1	0	0	1	0	0	1	4	3	3	3	2	4	2	2	2	4	4	2	3	2	2	2	2
3	3	3	1	2	2	0	0	1	0	0	1	0	0	1	0	0	1	0	0	1	0	0	1	0	0	1	4	4	5	2	6	6	3	3	4	5	5	3	5	5	4	4	1
1	1	1	2	1	2	0	0	1	0	0	1	0	0	1	0	0	1	0	0	1	0	0	1	0	0	1	4	2	4	1	4	2	4	3	3	4	3	1	4	3	1	1	2
2	2	2	3	1	1	0	0	1	0	0	1	0	0	1	0	0	1	0	0	1	0	0	1	0	0	1	1	2	2	1	3	1	3	1	2	5	5	4	4	5	5	5	1
1	1	3	3	1	2	0	0	1	0	0	1	0	0	1	0	0	1	0	0	1	0	0	1	0	0	1	4	4	4	4	3	3	4	4	3	2	2	1	1	2	2	1	1
2	2	2	1	5	2	0	0	1	0	0	1	0	0	1	0	0	1	0	0	1	0	0	1	0	0	1	4	3	3	2	1	2	1	1	1	2	3	4	3	3	3	5	1
2	2	2	2	5	2	0	0	1	0	0	1	0	0	1	0	0	1	0	0	1	0	0	1	0	0	1	4	5	3	2	5	6	4	3	2	4	3	1	4	2	2	1	1
2	2	2	1	1	2	0	0	1	0	0	1	0	0	1	0	0	1	0	0	1	0	0	1	0	0	1	4	4	4	3	4	3	3	1	1	4	3	2	3	2	1	1	1
3	3	1	2	2	2	0	0	1	0	0	1	0	0	1	0	0	1	0	0	1	0	0	1	0	0	1	4	5	3	3	5	5	4	1	1	4	4	3	4	4	2	2	6
2	2	2	3	1	2	0	0	1	0	0	1	0	0	1	0	0	1	0	0	1	0	0	1	0	0	1	4	3	3	3	4	4	4	4	4	5	5	2	4	5	3	3	2
1	2	2	3	1	2	0	0	1	0	0	1	0	0	1	0	0	1	0	0	1	0	0	1	0	0	1	4	3	3	4	4	3	4	3	4	4	3	3	3	3	3	3	1
2	2	2	3	1	2	0	0	1	0	0	1	0	0	1	0	0	1	0	0	1	0	0	1	0	0	1	4	4	5	3	5	4	5	2	4	2	4	1	2	1	1	1	1
2	2	2	1	5	2	0	0	1	0	0	1	0	0	1	0	0	1	0	0	1	0	0	1	0	0	1	4	1	3	1	3	1	1	1	1	5	4	1	3	2	1	1	1
3	3	3	2		2	0	0	1	0	0	1	0	0	1	0	0	1	0	0	1	0	0	1	0	0	1	4	3	3	3	4	3	3	3	3	4	3	1	3	3	1	1	1
1	2	3	2	1	2	0	0	1	0	0	1	0	0	1	0	0	1	0	0	1	0	0	1	0	0	1	4	3	3	1	4	4	2	1	4	2	3	1	4	2	1	2	1
2	2	2	3	1	2	0	0	1	0	0	1	0	0	1	0	0	1	0	0	1	0	0	1	0	0	1	4	3	4	4	4	4	3	3	4	3	3	2	3	2	3	3	7	0	0	0	0	0	1
1	1	2	4	6	1	0	0	1	0	0	1	0	0	1	0	0	1	0	0	1	0	0	1	0	0	1	4	5	4	3	1	1	2	2	4	4	3	2	3	4	2	3	6
2	2	2	3	1	2	0	0	1	0	0	1	0	0	1	0	0	1	0	0	1	0	0	1	0	0	1	3	3	3	3	3	3	3	3	3	4	4	1	2	5	4	3	1
1	2	2	1	1	2	0	0	1	0	0	1	0	0	1	0	0	1	0	0	1	0	0	1	0	0	1	4	3	4	3	5	4	5	3	3	2	3	2	2	2	1	1	1
2	2	2	3	6	2	0	0	1	0	0	1	0	0	1	0	0	1	0	0	1	0	0	1	0	0	1	4	3	3	3	3	3	3	3	3	3	3	3	3	3	3	3	1
2	2	2	2	1	2	0	0	1	0	0	1	0	0	1	0	0	1	0	0	1	0	0	1	0	0	1	4	3	3	3	3	3	3	3	3	3	5	3	3	3	3	3	7	0	0	0	0	0	0
2	2	2	3	5	2	0	0	1	0	0	1	0	0	1	0	0	1	0	0	1	0	0	1	0	0	1	4	1	1	1	4	6	2	3	3	2	4	1	2	3	1	1	1
1	3	3	3	6	2	0	0	1	0	0	1	0	0	1	0	0	1	0	0	1	0	0	1	0	0	1	4	2	3	2	4	3	3	2	2	3	3	2	3	2	2	2	1
2	2	2	2	1	2	0	0	1	0	0	1	0	0	1	0	0	1	0	0	1	0	0	1	0	0	1	4	2	2	2	2	2	2	2	3	3	3	2	2	2	1	1	1
3	3	3	3		2	0	0	1	0	0	1	0	0	1	0	0	1	0	0	1	0	0	1	0	0	1	4	3	3	3	5	4	4	3	3	4	4	2	4	4	2	2	5
2	2	2	1	1	2	0	0	1	0	0	1	0	0	1	0	0	1	0	0	1	0	0	1	0	0	1	4	2	3	3	6	1	2	3	4	4	2	1	3	1	1	1	8	0	1	1	0	0	0
2	2	2	2	7	2	0	0	1	0	0	1	0	0	1	0	0	1	0	0	1	0	0	1	0	0	1	4	3	3	3	3	5	3	1	1	3	3	3	3	3	3	3	2
3	3	3	2		2	0	0	1	0	0	1	0	0	1	0	0	1	0	0	1	0	0	1	0	0	1	4	3	4	4	5	5	3	3	4	4	4	2	2	2	1	1	1
2	2	2	1	1	1	0	0	1	0	0	1	0	0	1	0	0	1	0	0	1	0	0	1	0	0	1	4	3	4	3	4	5	3	3	3	3	3	1	3	3	3	3	1
1	2	2	4	1	2	0	0	1	0	0	1	0	0	1	0	0	1	0	0	1	0	0	1	0	0	1	4	4	5	2	3	3	5	3	3	3	3	4	3	3	2	3	2
2	2	2	1	1	2	0	0	1	0	0	1	0	0	1	0	0	1	0	0	1	0	0	1	0	0	1	4	1	1	1	1	1	1	1	1	1	1	1	1	1	1	1	1
2	2	2	2	7	2	0	0	1	0	0	1	0	0	1	0	0	1	0	0	1	0	0	1	0	0	1	4	3	4	3	4	4	4	2	2	3	3	1	3	2	1	1	1
1	2	1	2		2	0	0	1	0	0	1	0	0	1	0	0	1	0	0	1	0	0	1	0	0	1	4	4	3	4	4	3	3	3	3	3	4	2	2	2	1	2	1
2	2	2	2	1	2	0	0	1	0	0	1	0	0	1	0	0	1	0	0	1	0	0	1	0	0	1	4	3	3	3	4	3	3	3	4	4	4	3	3	4	3	3	1
2	2	2	2	1	2	0	0	1	0	0	1	0	0	1	0	0	1	0	0	1	0	0	1	0	0	1	4	4	4	2	3	4	2	3	3	3	3	3	3	3	3	3	1
2	2	2	3	1	2	0	0	1	0	0	1	0	0	1	0	0	1	0	0	1	0	0	1	0	0	1	3	4	4	3	4	3	3	3	3	4	4	2	2	4	2	2	1
2	2	2	2	1	2	0	0	1	0	0	1	0	0	1	0	0	1	0	0	1	0	0	1	0	0	1	4	3	4	3	5	4	5	2	3	5	3	1	5	3	1	1	1
1	1	2	3	1	2	0	0	1	0	0	1	0	0	1	0	0	1	0	0	1	0	0	1	0	0	1	4	5	4	2	4	5	4	3	2	5	4	1	4	4	2	2	1
2	2	2	2	1	2	0	0	1	0	0	1	0	0	1	0	0	1	0	0	1	0	0	1	0	0	1	4	3	3	3	3	5	3	2	2	4	2	2	2	4	2	2	1
2	2	2	1	1	2	0	0	1	0	0	1	0	0	1	0	0	1	0	0	1	0	0	1	0	0	1	4	3	4	3	6	4	4	3	2	3	4	1	4	1	1	1	1
2	2	2	1	1	2	0	0	1	0	0	1	0	0	1	0	0	1	0	0	1	0	0	1	0	0	1	4	2	4	3	5	5	5	3	4	2	2	1	2	2	1	1	2
2	2	2	3	1	2	0	0	1	0	0	1	0	0	1	0	0	1	0	0	1	0	0	1	0	0	1	4	3	3	4	4	3	4	2	4	4	3	2	4	4	2	2	1
2	2	2	1	1	2	0	0	1	0	0	1	0	0	1	0	0	1	0	0	1	0	0	1	0	0	1	4	1	3	1	5	4	4	3	1	5	3	1	4	3	1	1	1
1	2	2	2	1	2	0	0	1	0	0	1	0	0	1	0	0	1	0	0	1	0	0	1	0	0	1	4	3	3	3	3	3	3	3	3	4	4	3	4	4	3	4	1
2	2	2	2	1	2	0	0	1	0	0	1	0	0	1	0	0	1	0	0	1	0	0	1	0	0	1	4	4	4	3	4	4	5	6	6	5	5	1	5	4	2	2	7	0	1	0	0	1	1
2	2	2	2	1	2	0	0	1	0	0	1	0	0	1	0	0	1	0	0	1	0	0	1	0	0	1	4	4	4	3	4	4	4	4	4	5	2	1	1	1	1	1	1
2	2	2	1		2	0	0	1	0	0	1	0	0	1	0	0	1	0	0	1	0	0	1	0	0	1	4	4	4	3	3	4	3	3	3	4	3	1	4	2	2	1	2
2	2	2	3	1	1	0	0	1	0	0	1	0	0	1	0	0	1	0	0	1	0	0	1	0	0	1	4	6	5	4	3	5	5	5	5	5	5	5	5	5	5	5	8	0	1	0	0	0	0
3	3	3	2		2	0	0	1	0	0	1	0	0	1	0	0	1	0	0	1	0	0	1	0	0	1	4	1	4	1	6	1	1	1	1	4	4	2	4	3	2	3	1
2	2	2	2	1	2	0	0	1	0	0	1	0	0	1	0	0	1	0	0	1	0	0	1	0	0	1	3	4	4	4	4	4	4	4	5	3	3	2	3	3	2	2	2
3	3	3	2	1	2	0	0	1	0	0	1	0	0	1	0	0	1	0	0	1	0	0	1	0	0	1	4	1	1	1	1	4	3	2	2	5	4	2	4	3	2	2	1
2	2	2	1	5	2	0	0	1	0	0	1	0	0	1	0	0	1	0	0	1	0	0	1	0	0	1	4	1	1	1	1	6	6	4	4	4	3	3	3	3	3	3	1
2	2	2	3	5	2	0	0	1	0	0	1	0	0	1	0	0	1	0	0	1	0	0	1	0	0	1	4	5	3	3	4	4	4	4	4	4	4	4	4	3	3	3	1
1	2	2	1	3	2	0	0	1	0	0	1	0	0	1	0	0	1	0	0	1	0	0	1	0	0	1	4	3	4	3	4	4	4	4	4	4	4	1	2	2	1	1	1
1	1	2	2	1	2	0	0	1	0	0	1	0	0	1	0	0	1	0	0	1	0	0	1	0	0	1	4	3	3	1	5	3	2	1	2	4	2	1	4	3	1	1	2
3	3	3	3		2	0	0	1	0	0	1	0	0	1	0	0	1	0	0	1	0	0	1	0	0	1	4	3	3	3	3	3	3	3	3	3	3	3	3	3	3	3	6
2	3	2	4	5	2	0	1	0	0	0	1	0	0	1	0	0	1	0	0	1	0	0	1	0	0	1	4	3	3	4	3	4	3	4	2	4	2	3	3	1	3	3	1
2	2	2	3	6	2	0	0	1	0	0	1	0	0	1	0	0	1	0	0	1	0	0	1	0	0	1	4	4	4	4	4	5	4	3	3	4	4	4	3	3	3	3	1
2	2	2	2	1	2	0	0	1	0	0	1	0	0	1	0	0	1	0	0	1	0	0	1	0	0	1	4	4	4	3	3	4	4	3	3	3	4	2	3	2	1	1	1
1	2	2	2	7	2	0	0	1	0	0	1	0	0	1	0	0	1	0	0	1	0	0	1	0	0	1	4	3	4	4	4	4	4	4	4	5	5	3	4	3	3	3	1
1	2	2	2	4	2	0	0	1	0	0	1	0	0	1	0	0	1	0	0	1	0	0	1	0	0	1	2	3	4	3	3	5	3	3	3	3	4	2	4	3	3	2	7	0	1	0	0	1	1
2	2	2	3	1	2	0	0	1	0	0	1	0	0	1	0	0	1	0	0	1	0	0	1	0	0	1	4	4	4	4	4	4	4	3	4	4	4	2	4	4	2	2	1
2	2	2	1	4	2	0	0	1	0	0	1	0	0	1	0	0	1	0	0	1	0	0	1	0	0	1	3	3	3	4	4	4	4	3	3	4	2	1	3	1	1	1	1
3	3	3	1		2	0	0	1	0	0	1	0	0	1	0	0	1	0	0	1	0	0	1	0	0	1	4	1	3	1	1	1	1	1	1	2	3	1	1	1	1	1	2
2	1	2	2	5	2	0	0	1	0	0	1	0	0	1	0	0	1	0	0	1	0	0	1	0	0	1	2	3	3	2	3	2	2	3	2	4	4	4	4	4	2	2	2
2	2	2	1	1	2	0	0	1	0	0	1	0	0	1	0	0	1	0	0	1	0	0	1	0	0	1	4	5	4	3	3	5	4	3	4	4	4	1	3	3	2	1	2
3	3	3	3		2	0	0	1	0	0	1	0	0	1	0	0	1	0	0	1	0	0	1	0	0	1	4	2	3	2	5	3	4	3	4	3	4	1	3	2	1	1	6
2	2	2	2	1	1	0	0	1	0	0	1	0	0	1	0	0	1	0	0	1	0	0	1	0	0	1	4	3	3	3	6	6	4	4	5	5	5	1	3	2	3	1	1
2	2	2	3	1	1	0	0	1	0	0	1	0	0	1	0	0	1	0	0	1	0	0	1	0	0	1	4	3	3	4	3	3	4	3	3	2	3	2	3	3	3	3	1
2	2	2	2	1	2	0	0	1	0	0	1	0	0	1	0	0	1	0	0	1	0	0	1	0	0	1	4	4	4	2	4	4	4	4	4	2	2	2	2	2	2	1	1
2	2	2	3	5	1	0	0	1	0	0	1	0	0	1	0	0	1	0	0	1	0	0	1	0	0	1	4	3	4	2	3	1	3	1	1	4	2	1	4	3	1	1	1
1	2	2	1	3	2	0	0	1	0	0	1	0	0	1	0	0	1	0	0	1	0	0	1	0	0	1	4	3	4	3	3	6	3	4	4	1	5	3	1	4	1	1	1
2	2	2	3	4	2	0	0	1	0	0	1	0	0	1	0	0	1	0	0	1	0	0	1	0	0	1	4	4	4	3	3	4	3	3	3	4	3	2	3	3	2	2	2
3	3	3	3	1	2	0	0	1	0	0	1	0	0	1	0	0	1	0	0	1	0	0	1	0	0	1	4	4	4	3	3	6	4	4	4	4	4	3	3	3	3	3	1
2	2	2	2	3	2	0	0	1	0	0	1	0	0	1	0	0	1	0	0	1	0	0	1	0	0	1	4	3	2	2	4	5	3	3	3	3	3	2	3	2	1	1	1
2	2	2	3	1	2	0	0	1	0	0	1	0	0	1	0	0	1	0	0	1	0	0	1	0	0	1	4	5	5	5	5	5	5	3	4	4	3	2	4	4	2	2	1
2	2	2	3	1	2	0	0	1	0	0	1	0	0	1	0	0	1	0	0	1	0	0	1	0	0	1	4	2	2	3	4	6	4	4	4	2	2	1	1	1	1	1	1
2	2	2	3	7	2	0	0	1	0	0	1	0	0	1	0	0	1	0	0	1	0	0	1	0	0	1	4	4	3	4	4	2	3	3	3	3	2	1	3	1	1	1	1
1	2	2	1	7	2	0	0	1	0	0	1	0	0	1	0	0	1	0	0	1	0	0	1	0	0	1	4	3	4	2	2	3	4	3	2	4	3	1	2	1	1	1	1
2	2	2	3	1	2	0	0	1	0	0	1	0	0	1	0	0	1	0	0	1	0	0	1	0	0	1	4	4	4	3	4	3	3	2	3	5	5	2	4	3	2	2	1
2	2	2	1	1	2	0	0	1	0	0	1	0	0	1	0	0	1	0	0	1	0	0	1	0	0	1	4	1	4	4	6	3	3	3	2	5	4	4	5	3	3	3	1
2	2	2	1	7	2	0	0	1	0	0	1	0	0	1	0	0	1	0	0	1	0	0	1	0	0	1	4	3	3	3	4	4	3	3	3	3	3	1	3	3	1	1	1
1	1	2	3	6	1	0	0	1	0	0	1	0	0	1	0	0	1	0	0	1	0	0	1	0	0	1	4	3	3	2	4	4	3	2	1	3	3	1	2	2	1	1	1
2	2	2	1	5	2	0	0	1	0	0	1	0	0	1	0	0	1	0	0	1	0	0	1	0	0	1	4	4	5	3	4	5	4	4	3	4	4	1	3	4	1	1	1
1	2	2	1	1	2	0	0	1	0	0	1	0	0	1	0	0	1	0	0	1	0	0	1	0	0	1	4	2	2	2	5	4	3	3	5	3	2	1	2	2	1	1	1
1	2	2	1	1	2	0	0	1	0	0	1	0	0	1	0	0	1	0	0	1	0	0	1	0	0	1	4	1	1	1	1	1	1	1	1	3	3	3	5	3	3	3	1
3	3	3	3		2	0	0	1	0	0	1	0	0	1	0	0	1	0	0	1	0	0	1	0	0	1	4	4	4	3	4	2	4	4	4	4	4	4	4	3	2	2	8	0	1	0	0	0	1
2	2	2	2	1	2	0	0	1	0	0	1	0	0	1	0	0	1	0	0	1	0	0	1	0	0	1	4	3	3	2	4	1	3	2	2	2	3	1	2	2	2	1	1
2	2	2	2	1	2	0	0	1	0	0	1	0	0	1	0	0	1	0	0	1	0	0	1	0	0	1	4	2	2	2	4	3	2	2	3	4	4	2	3	3	2	2	1
3	3	3	3		2	0	0	1	0	0	1	0	0	1	0	0	1	0	0	1	0	0	1	0	0	1	4	3	4	3	5	5	5	2	3	4	4	1	2	3	2	2	7	0	1	1	0	0	0
2	1	2	2	1	2	0	0	1	0	0	1	0	0	1	0	0	1	0	0	1	0	0	1	0	0	1	4	4	3	3	3	2	5	4	1	2	3	3	2	2	3	2	1
2	2	2	2	5	2	0	0	1	0	0	1	0	0	1	0	0	1	0	0	1	0	0	1	0	0	1	4	3	4	1	2	4	2	3	3	2	2	1	3	2	1	1	1
2	2	2	3	1	2	0	0	1	0	0	1	0	0	1	0	0	1	0	0	1	0	0	1	0	0	1	4	3	4	3	4	4	2	4	5	1	1	1	1	1	1	1	1
1	2	2	2	1	1	0	0	1	0	0	1	0	0	1	0	0	1	0	0	1	0	0	1	0	0	1	4	5	5	3	4	4	4	2	2	3	4	2	2	2	2	2	1
2	2	2	2	4	2	0	0	1	0	0	1	0	0	1	0	0	1	0	0	1	0	0	1	0	0	1	4	3	3	3	3	3	3	3	2	4	4	2	3	4	2	2	1
2	2	2	3	1	1	0	0	1	0	0	1	0	0	1	0	0	1	0	0	1	0	0	1	0	0	1	4	4	3	3	4	4	3	1	4	4	4	4	4	4	1	1	1
2	2	2	1	2	2	0	0	1	0	0	1	0	0	1	0	0	1	0	0	1	0	0	1	0	0	1	4	2	4	1	3	4	1	2	5	4	3	2	4	3	2	2	1
2	2	2	2	5	2	0	0	1	0	0	1	0	0	1	0	0	1	0	0	1	0	0	1	0	0	1	4	1	5	1	3	4	4	4	5	4	4	1	4	4	1	1	1
2	2	2	1	7	2	0	0	1	0	0	1	0	0	1	0	0	1	0	0	1	0	0	1	0	0	1	4	3	3	3	4	4	3	3	4	4	4	1	2	2	1	1	1
2	2	2	2	1	2	0	0	1	0	0	1	0	0	1	0	0	1	0	0	1	0	0	1	0	0	1	4	3	3	3	3	3	3	3	3	4	3	3	3	3	1	1	1
2	1	2	2	1	2	0	0	1	0	0	1	0	0	1	0	0	1	0	0	1	0	0	1	0	0	1	4	4	5	3	4	4	4	3	3	4	4	2	2	2	2	2	1
2	2	2	1	1	2	0	0	1	0	0	1	0	0	1	0	0	1	0	0	1	0	0	1	0	0	1	4	2	2	2	2	4	3	3	3	5	5	5	5	5	5	5	1
2	2	2	1	6	2	0	0	1	0	0	1	0	0	1	0	0	1	0	0	1	0	0	1	0	0	1	4	1	1	1	1	1	1	1	1	4	3	3	3	3	1	1	1
2	2	2	2	3	2	0	0	1	0	0	1	0	0	1	0	0	1	0	0	1	0	0	1	0	0	1	4	3	3	3	3	2	2	2	5	2	2	2	2	4	2	2	1
2	2	2	2	2	2	0	0	1	0	0	1	0	0	1	0	0	1	0	0	1	0	0	1	0	0	1	4	3	4	2	5	4	2	2	2	4	2	1	2	1	1	1	1
1	3	3	3		2	0	0	1	0	0	1	0	0	1	0	0	1	0	0	1	0	0	1	0	0	1	4	4	4	3	5	4	4	3	4	4	4	3	3	4	3	3	1
1	2	2	1	1	2	0	0	1	0	0	1	0	0	1	0	0	1	0	0	1	0	0	1	0	0	1	4	3	3	3	3	4	3	3	3	4	4	1	3	3	1	1	6
2	2	2	2	1	2	0	0	1	0	0	1	0	0	1	0	0	1	0	0	1	0	0	1	0	0	1	4	3	3	1	4	3	3	1	2	4	3	1	4	1	1	1	1
2	2	2	2	1	2	0	0	1	0	0	1	0	0	1	0	0	1	0	0	1	0	0	1	0	0	1	4	3	4	3	4	4	4	3	3	4	4	2	3	3	2	2	1
1	2	2	2	6	2	0	0	1	0	0	1	0	0	1	0	0	1	0	0	1	0	0	1	0	0	1	3	3	4	4	5	4	3	4	5	3	4	2	4	2	2	2	8	0	1	1	0	0	1
2	2	2	2		2	0	0	1	0	0	1	0	0	1	0	0	1	0	0	1	0	0	1	0	0	1	4	1	1	1	1	4	1	1	2	3	3	3	3	3	3	3	1
2	2	2	2	1	2	0	0	1	0	0	1	0	0	1	0	0	1	0	0	1	0	0	1	0	0	1	4	2	5	2	5	1	4	3	4	4	3	1	3	2	2	2	2
2	3	2	1	7	2	0	0	1	0	0	1	0	0	1	0	0	1	0	0	1	0	0	1	0	0	1	4	2	2	2	4	5	3	3	3	4	4	2	4	3	1	1	1
2	2	2	2	1	2	0	0	1	0	0	1	0	0	1	0	0	1	0	0	1	0	0	1	0	0	1	4	3	5	3	5	4	3	4	4	4	4	2	4	3	2	2	1
2	2	2	1	1	2	0	0	1	0	0	1	0	0	1	0	0	1	0	0	1	0	0	1	0	0	1	4	3	4	3	5	5	4	3	2	4	3	1	3	3	1	1	6
2	2	2	1	1	2	0	0	1	0	0	1	0	0	1	0	0	1	0	0	1	0	0	1	0	0	1	4	2	4	1	5	6	3	3	4	4	3	1	1	3	1	1	1
3	3	3	3		2	0	0	1	0	0	1	0	0	1	0	0	1	0	0	1	0	0	1	0	0	1	4	1	1	1	6	4	3	3	4	5	5	2	4	5	2	2	1
2	2	2	3	1	2	0	0	1	0	0	1	0	0	1	0	0	1	0	0	1	0	0	1	0	0	1	4	3	2	3	3	3	5	4	2	3	3	3	3	3	3	3	1
2	2	2	1	1	2	0	0	1	0	0	1	0	0	1	0	0	1	0	0	1	0	0	1	0	0	1	4	5	6	5	4	3	3	4	4	3	3	1	1	1	1	1	1
2	2	2	1	1	2	0	0	1	0	0	1	0	0	1	0	0	1	0	0	1	0	0	1	0	0	1	4	5	6	3	5	6	6	1	1	1	1	1	1	1	1	1	1
2	2	2	2	1	2	0	0	1	0	0	1	0	0	1	0	0	1	0	0	1	0	0	1	0	0	1	4	4	4	4	4	3	3	3	4	2	2	2	2	2	2	2	1
2	2	2	2	1	2	0	0	1	0	0	1	0	0	1	0	0	1	0	0	1	0	0	1	0	0	1	4	3	3	1	6	6	3	1	4	4	3	2	5	2	2	2	1
2	2	2	2	1	2	0	0	1	0	0	1	0	0	1	0	0	1	0	0	1	0	0	1	0	0	1	4	1	1	1	1	5	1	1	1	5	5	1	5	2	1	1	1
2	2	2	1	1	1	0	0	1	0	0	1	0	0	1	0	0	1	0	0	1	0	0	1	0	0	1	4	4	4	1	6	3	6	1	1	5	5	2	5	5	1	1	1
2	2	2	2	5	2	0	0	1	0	0	1	0	0	1	0	0	1	0	0	1	0	0	1	0	0	1	4	2	4	2	3	4	3	2	2	4	3	2	3	2	1	1	1
2	2	2	3	1	2	0	0	1	0	0	1	0	0	1	0	0	1	0	0	1	0	0	1	0	0	1	4	2	4	4	3	3	3	3	3	2	2	2	2	2	2	2	1
2	1	2	2	1	2	0	0	1	0	0	1	0	0	1	0	0	1	0	0	1	0	0	1	0	0	1	4	3	3	3	3	3	3	3	3	4	3	2	4	3	2	2	1
2	2	2	2	1	2	0	0	1	0	0	1	0	0	1	0	0	1	0	0	1	0	0	1	0	0	1	4	3	4	3	5	4	4	2	3	4	4	1	4	2	1	1	1
3	3	3	2	1	2	0	0	1	0	0	1	0	0	1	0	0	1	0	0	1	0	0	1	0	0	1	4	4	4	4	4	6	4	4	4	3	3	1	2	3	1	1	2
2	2	2	3	1	2	0	0	1	0	0	1	0	0	1	0	0	1	0	0	1	0	0	1	0	0	1	3	4	2	2	6	3	3	3	6	2	2	4	4	4	1	3	2
2	2	2	1	1	2	0	0	1	0	0	1	0	0	1	0	0	1	0	0	1	0	0	1	0	0	1	4	1	1	1	1	1	1	1	1	4	2	1	3	2	4	1	1
2	2	2	2	1	2	0	0	1	0	0	1	0	0	1	0	0	1	0	0	1	0	0	1	0	0	1	4	4	5	2	6	5	4	2	4	2	4	2	2	3	2	2	1
2	3	2	3	5	2	0	0	1	0	0	1	0	0	1	0	0	1	0	0	1	0	0	1	0	0	1	4	4	4	4	4	2	3	5	3	3	2	2	3	2	3	4	2
2	2	2	1	2	2	0	0	1	0	0	1	0	0	1	0	0	1	0	0	1	0	0	1	0	0	1	4	5	5	4	6	5	4	3	4	4	2	1	4	2	1	2	1
3	3	3	3		2	0	0	1	0	0	1	0	0	1	0	0	1	0	0	1	0	0	1	0	0	1	4	3	4	3	4	3	3	3	3	5	4	2	5	4	2	2	1
2	2	2	3	1	2	0	0	1	0	0	1	0	0	1	0	0	1	0	0	1	0	0	1	0	0	1	4	4	4	3	3	3	4	5	3	3	3	2	2	2	2	2	1
2	2	2	3	3	2	0	0	1	0	0	1	0	0	1	0	0	1	0	0	1	0	0	1	0	0	1	4	2	3	2	4	3	2	2	3	3	3	3	4	3	1	1	7	0	1	0	1	1	1
2	2	2	3	1	2	0	0	1	0	0	1	0	0	1	0	0	1	0	0	1	0	0	1	0	0	1	4	3	3	3	3	3	3	3	3	5	5	5	5	5	5	5	1
2	2	2	2	1	2	0	0	1	0	0	1	0	0	1	0	0	1	0	0	1	0	0	1	0	0	1	4	2	3	2	6	6	4	3	3	4	4	2	4	3	2	3	1
1	2	2	1	1	2	0	0	1	0	0	1	0	0	1	0	0	1	0	0	1	0	0	1	0	0	1	4	6	6	6	6	6	6	6	6	5	5	1	5	5	5	1	1
1	2	2	2	5	2	0	0	1	0	0	1	0	0	1	0	0	1	0	0	1	0	0	1	0	0	1	4	3	4	2	4	4	4	2	2	2	1	1	3	2	1	1	1
3	3	3	2		2	0	0	1	0	0	1	0	0	1	0	0	1	0	0	1	0	0	1	0	0	1	4	1	2	1	6	3	4	3	4	4	4	2	4	4	2	1	7	0	1	0	0	0	0
2	2	2	1	6	2	0	0	1	0	0	1	0	0	1	0	0	1	0	0	1	0	0	1	0	0	1	4	3	4	3	4	4	4	4	6	4	3	2	4	3	3	2	7	0	1	0	0	0	0
2	2	2	2	6	2	0	0	1	0	0	1	0	0	1	0	0	1	0	0	1	0	0	1	0	0	1	4	1	4	3	4	1	2	3	1	5	2	1	5	4	1	1	1
2	2	2	2	6	2	0	0	1	0	0	1	0	0	1	0	0	1	0	0	1	0	0	1	0	0	1	4	1	3	1	3	6	4	3	4	2	1	1	1	1	1	1	1
2	2	2	3	7	2	0	0	1	0	0	1	0	0	1	0	0	1	0	0	1	0	0	1	0	0	1	4	1	1	1	1	4	4	3	3	4	4	2	2	2	2	2	1
2	2	2	2	1	2	0	0	1	0	0	1	0	0	1	0	0	1	0	0	1	0	0	1	0	0	1	3	3	2	2	3	5	4	2	3	4	4	2	3	2	2	2	1
3	3	3	3		2	0	0	1	0	0	1	0	0	1	0	0	1	0	0	1	0	0	1	0	0	1	4	3	3	3	4	6	4	3	4	5	4	2	4	4	1	1	1
2	2	2	2	2	2	0	0	1	0	0	1	0	0	1	0	0	1	0	0	1	0	0	1	0	0	1	4	4	4	3	4	4	3	3	4	3	3	3	4	3	3	3	1
2	2	2	3	1	2	0	0	1	0	0	1	0	0	1	0	0	1	0	0	1	0	0	1	0	0	1	4	4	4	4	4	4	4	4	4	3	3	3	3	3	3	3	1
2	2	2	3	1	2	0	0	1	0	0	1	0	0	1	0	0	1	0	0	1	0	0	1	0	0	1	4	5	5	2	4	6	4	2	3	5	2	1	3	1	1	1	1
2	2	2	2	1	2	0	0	1	0	0	1	0	0	1	0	0	1	0	0	1	0	0	1	0	0	1	4	3	4	3	3	4	3	2	3	3	3	2	2	2	1	1	1
2	2	2	2	7	2	0	0	1	0	0	1	0	0	1	0	0	1	0	0	1	0	0	1	0	0	1	4	4	4	4	5	6	4	3	3	4	3	2	4	3	1	1	1
1	2	2	2	1	2	0	0	1	0	0	1	0	0	1	0	0	1	0	0	1	0	0	1	0	0	1	4	3	4	3	3	3	3	3	4	3	3	1	3	2	1	1	1
2	2	2	3		2	0	0	1	0	0	1	0	0	1	0	0	1	0	0	1	0	0	1	0	0	1	4	4	3	3	4	4	3	4	3	4	3	1	2	2	1	1	1
2	2	2	3	1	2	0	0	1	0	0	1	0	0	1	0	0	1	0	0	1	0	0	1	0	0	1	4	3	4	3	3	4	4	3	4	4	4	2	4	4	2	2	1
2	2	2	1	1	2	0	0	1	0	0	1	0	0	1	0	0	1	0	0	1	0	0	1	0	0	1	4	4	3	4	4	3	3	4	3	4	4	2	2	2	3	3	1
3	3	3	3	1	2	0	0	1	0	0	1	0	0	1	0	0	1	0	0	1	0	0	1	0	0	1	4	4	4	4	4	3	4	3	4	3	3	3	3	3	3	3	1
2	2	2	3	1	2	1	0	0	0	0	1	0	0	1	0	0	1	0	0	1	0	0	1	0	0	1	4	4	2	3	6	5	4	3	3	3	4	1	4	3	2	2	1
3	3	3	2		2	0	0	1	0	0	1	0	0	1	0	0	1	0	0	1	0	0	1	0	0	1	4	4	5	4	6	4	4	2	3	4	3	1	3	2	1	1	1
1	2	2	3	3	2	0	0	1	0	0	1	0	0	1	0	0	1	0	0	1	0	0	1	0	0	1	4	3	4	2	4	5	3	3	3	2	3	1	2	2	1	1	2
2	2	2	3	1	2	0	0	1	0	0	1	0	0	1	0	0	1	0	0	1	0	0	1	0	0	1	4	3	3	3	3	5	3	4	4	5	5	4	4	4	1	1	1
2	1	2	1	1	2	0	0	1	0	0	1	0	0	1	0	0	1	0	0	1	0	0	1	0	0	1	4	3	3	3	4	3	3	3	4	3	3	1	3	2	1	1	1
3	3	3	4		2	0	0	1	0	0	1	0	0	1	0	0	1	0	0	1	0	0	1	0	0	1	4	4	4	2	3	4	4	2	4	3	5	2	2	2	2	2	8	0	0	1	1	1	1
1	2	2	2	1	2	0	0	1	0	0	1	0	0	1	0	0	1	0	0	1	0	0	1	0	0	1	4	4	4	3	5	5	5	5	4	4	4	3	5	3	1	1	1
2	2	2	2	7	1	0	0	1	0	0	1	0	0	1	0	0	1	0	0	1	0	0	1	0	0	1	4	3	3	3	3	3	3	3	3	5	4	4	4	3	1	2	1
2	2	2	3	1	2	0	0	1	0	0	1	0	0	1	0	0	1	0	0	1	0	0	1	0	0	1	4	3	3	3	2	3	4	4	2	3	3	2	4	3	3	2	7	0	0	1	0	0	0
2	2	2	1	1	2	0	0	1	0	0	1	0	0	1	0	0	1	0	0	1	0	0	1	0	0	1	4	3	2	4	5	3	3	3	3	5	4	3	5	4	3	3	1
2	2	2	1	1	2	0	0	1	0	0	1	0	0	1	0	0	1	0	0	1	0	0	1	0	0	1	4	3	3	4	5	5	4	3	2	5	4	2	4	5	3	2	1
2	2	2	2	1	2	0	0	1	0	0	1	0	0	1	0	0	1	0	0	1	0	0	1	0	0	1	4	3	4	3	4	4	4	3	3	4	3	2	4	3	2	2	7	0	1	0	0	0	0
2	2	2	1		2	0	0	1	0	0	1	0	0	1	0	0	1	0	0	1	0	0	1	0	0	1	4	3	3	3	4	1	2	1	3	4	4	1	3	3	1	1	1
2	2	2	2	6	2	0	0	1	0	0	1	0	0	1	0	0	1	0	0	1	0	0	1	0	0	1	4	4	3	3	3	3	4	4	3	3	3	2	4	2	2	4	7	0	0	1	1	0	0
2	2	2	2	1	2	0	0	1	0	0	1	0	0	1	0	0	1	0	0	1	0	0	1	0	0	1	4	6	6	6	4	2	3	3	4	2	1	2	2	3	2	2	1
2	2	2	2	4	2	0	0	1	0	0	1	0	0	1	0	0	1	0	0	1	0	0	1	0	0	1	4	3	3	3	3	3	3	3	3	4	4	2	3	4	2	3	1
2	2	2	1	1	2	0	0	1	0	0	1	0	0	1	0	0	1	0	0	1	0	0	1	0	0	1	4	3	6	6	6	6	5	6	6	5	1	1	3	1	1	1	1
1	2	2	3	1	1	0	0	1	0	0	1	0	0	1	0	0	1	0	0	1	0	0	1	0	0	1	4	4	4	4	4	4	4	3	3	3	4	2	4	2	1	1	8	0	1	1	1	0	1
2	2	2	2	5	2	0	0	1	0	0	1	0	0	1	0	0	1	0	0	1	0	0	1	0	0	1	4	4	4	3	4	4	3	3	4	4	4	2	4	3	2	2	1
1	2	2	1	1	1	0	0	1	0	0	1	0	0	1	0	0	1	0	0	1	0	0	1	0	0	1	4	2	4	1	6	3	1	1	1	4	4	1	5	3	1	1	1
2	2	2	1	4	2	0	0	1	0	0	1	0	0	1	0	0	1	0	0	1	0	0	1	0	0	1	4	4	4	3	1	3	4	5	3	4	5	2	4	2	1	1	1
2	2	2	2	5	2	0	0	1	0	0	1	0	0	1	0	0	1	0	0	1	0	0	1	0	0	1	4	4	4	4	4	4	4	3	3	4	4	2	4	3	2	1	1
1	3	1	1		2	0	0	1	0	0	1	0	0	1	0	0	1	0	0	1	0	0	1	0	0	1	4	3	3	1	4	4	4	2	2	5	3	1	2	2	1	1	6
2	2	2	1	7	2	0	0	1	0	0	1	0	0	1	0	0	1	0	0	1	0	0	1	0	0	1	4	1	3	1	4	2	4	1	1	4	4	1	3	4	1	1	1
2	2	1	3	1	2	0	0	1	0	0	1	0	0	1	0	0	1	0	0	1	0	0	1	0	0	1	4	4	3	5	5	4	4	4	5	2	3	1	2	2	3	3	6
2	2	2	2	1	2	0	0	1	0	0	1	0	0	1	0	0	1	0	0	1	0	0	1	0	0	1	4	3	3	3	5	4	3	1	1	4	4	1	4	4	1	1	1
2	2	2	1	1	2	0	0	1	0	0	1	0	0	1	0	0	1	0	0	1	0	0	1	0	0	1	4	5	5	4	5	6	4	2	5	5	3	2	4	2	2	2	1
1	2	2	2	3	2	0	0	1	0	0	1	0	0	1	0	0	1	0	0	1	0	0	1	0	0	1	4	3	2	3	2	6	3	3	2	5	3	2	4	4	2	1	1
2	2	2	1	5	2	0	0	1	0	0	1	0	0	1	0	0	1	0	0	1	0	0	1	0	0	1	4	3	3	3	4	3	3	3	4	4	3	1	4	4	1	1	1
2	2	2	1	3	2	0	0	1	0	0	1	0	0	1	0	0	1	0	0	1	0	0	1	0	0	1	4	3	3	3	5	4	4	4	6	3	4	1	3	3	1	1	1
2	2	2	3	7	2	0	0	1	0	0	1	0	0	1	0	0	1	0	0	1	0	0	1	0	0	1	4	2	2	3	3	3	3	3	3	3	4	1	3	1	1	1	1
1	1	2	2	6	2	0	0	1	0	0	1	0	0	1	0	0	1	0	0	1	0	0	1	0	0	1	4	2	2	1	2	2	2	2	4	3	2	1	2	1	1	1	1
2	2	2	3	6	2	0	0	1	0	0	1	0	0	1	0	0	1	0	0	1	0	0	1	0	0	1	4	3	4	4	4	4	3	3	3	5	5	1	5	4	1	1	1
2	2	2	3	6	2	0	0	1	0	0	1	0	0	1	0	0	1	0	0	1	0	0	1	0	0	1	4	2	2	2	2	4	2	2	2	4	4	2	4	2	2	2	1
1	2	2	1	6	2	0	0	1	0	0	1	0	0	1	0	0	1	0	0	1	0	0	1	0	0	1	4	4	4	3	4	4	4	4	4	4	3	1	3	1	1	1	1
3	3	3	1	1	2	0	0	1	0	0	1	0	0	1	0	0	1	0	0	1	0	0	1	0	0	1	4	1	1	1	1	1	1	1	1	3	3	3	3	3	2	2	1
2	2	2	2	1	2	0	0	1	0	0	1	0	0	1	0	0	1	0	0	1	0	0	1	0	0	1	4	2	4	2	3	3	3	3	2	4	3	1	3	3	1	1	1
2	2	2	1	3	2	0	0	1	0	0	1	0	0	1	0	0	1	0	0	1	0	0	1	0	0	1	4	1	1	2	1	2	3	2	3	4	2	2	2	2	1	1	1
2	2	1	1	1	2	0	0	1	0	0	1	0	0	1	0	0	1	0	0	1	0	0	1	0	0	1	4	4	4	3	4	4	4	4	4	3	4	1	2	3	1	1	7	1	1	0	1	1	1
2	2	2	2	5	2	0	0	1	0	0	1	0	0	1	0	0	1	0	0	1	0	0	1	0	0	1	3	4	4	4	5	5	4	3	3	4	4	1	4	4	1	1	8	0	1	0	1	0	0
1	1	3	2	1	2	0	0	1	0	0	1	0	0	1	0	0	1	0	0	1	0	0	1	0	0	1	4	3	3	3	4	4	3	2	3	4	3	2	4	4	4	3	1
2	2	2	2	1	2	0	0	1	0	0	1	0	0	1	0	0	1	0	0	1	0	0	1	0	0	1	4	3	3	3	4	4	3	3	3	5	5	1	5	3	1	1	1
2	2	2	2	1	2	0	0	1	0	0	1	0	0	1	0	0	1	0	0	1	0	0	1	0	0	1	4	4	5	3	3	5	3	3	3	2	4	1	2	2	1	1	1
2	2	2	3		2	0	0	1	0	0	1	0	0	1	0	0	1	0	0	1	0	0	1	0	0	1	4	3	3	3	4	3	3	2	3	3	3	2	2	2	1	1	2
2	2	2	3	1	2	0	0	1	0	0	1	0	0	1	0	0	1	0	0	1	0	0	1	0	0	1	4	3	3	3	3	5	3	3	3	3	3	3	3	3	3	3	1
3	3	3	1	1	2	0	0	1	0	0	1	0	0	1	0	0	1	0	0	1	0	0	1	0	0	1	4	1	1	1	1	1	1	1	1	5	1	1	1	2	1	1	1
1	2	2	1	5	2	0	0	1	0	0	1	0	0	1	0	0	1	0	0	1	0	0	1	0	0	1	4	1	1	1	1	6	6	1	1	4	3	1	1	1	1	1	1
2	2	2	3	1	2	0	0	1	0	0	1	0	0	1	0	0	1	0	0	1	0	0	1	0	0	1	4	3	3	3	3	4	3	3	3	4	4	2	4	2	2	2	1
1	2	2	2	1	2	0	0	1	0	0	1	0	0	1	0	0	1	0	0	1	0	0	1	0	0	1	4	3	4	2	4	3	3	2	3	4	4	1	4	2	1	1	1
1	1	2	2	1	2	0	0	1	0	0	1	0	0	1	0	0	1	0	0	1	0	0	1	0	0	1	4	4	4	4	4	4	4	4	4	3	3	3	3	3	3	3	1
1	3	3	1	1	2	0	0	1	0	0	1	0	0	1	0	0	1	0	0	1	0	0	1	0	0	1	4	3	5	3	6	4	2	3	4	5	2	1	4	1	1	1	1
1	2	2	3	6	1	0	0	1	0	0	1	0	0	1	0	0	1	0	0	1	0	0	1	0	0	1	4	3	3	4	3	3	4	4	3	4	4	1	1	3	2	3	2
1	2	2	3	4	2	0	0	1	0	0	1	0	0	1	0	0	1	0	0	1	0	0	1	0	0	1	4	3	4	4	4	5	3	3	4	3	2	1	2	1	1	1	1
3	3	3	4		2	0	0	1	0	0	1	0	0	1	0	0	1	0	0	1	0	0	1	0	0	1	4	5	5	5	5	6	6	6	5	3	3	2	3	3	2	3	1
3	3	3	3		2	0	0	1	0	0	1	0	0	1	0	0	1	0	0	1	0	0	1	0	0	1	4	3	4	3	3	4	3	3	3	3	4	1	3	3	1	3	1
3	1	3	1	4	2	0	0	1	0	0	1	0	0	1	0	0	1	0	0	1	0	0	1	0	0	1	4	3	4	5	5	3	3	4	4	4	4	2	3	3	1	1	1
3	3	3	2		2	0	0	1	0	0	1	0	0	1	0	0	1	0	0	1	0	0	1	0	0	1	4	4	3	3	4	3	4	3	3	3	2	2	1	2	1	2	7	0	1	0	0	1	0
2	2	2	1	1	2	0	0	1	0	0	1	0	0	1	0	0	1	0	0	1	0	0	1	0	0	1	4	3	4	1	5	3	4	2	2	3	2	2	2	2	2	2	1
2	2	2	3	7	2	0	0	1	0	0	1	0	0	1	0	0	1	0	0	1	0	0	1	0	0	1	4	3	4	3	3	6	1	4	4	5	5	1	3	4	1	1	1
2	2	2	2	4	2	0	0	1	0	0	1	0	0	1	0	0	1	0	0	1	0	0	1	0	0	1	4	1	1	1	4	6	1	1	1	1	3	1	1	1	1	1	1
2	1	2	3	1	2	0	0	1	0	0	1	0	0	1	0	0	1	0	0	1	0	0	1	0	0	1	4	2	4	1	4	5	2	2	2	4	4	2	2	3	3	2	1
2	2	2	2	1	2	0	0	1	0	0	1	0	0	1	0	0	1	0	0	1	0	0	1	0	0	1	4	5	5	6	4	6	5	6	4	4	5	2	4	5	1	1	1
1	2	2	2	1	2	0	0	1	0	0	1	0	0	1	0	0	1	0	0	1	0	0	1	0	0	1	4	2	3	2	5	4	3	1	1	3	2	1	3	3	2	1	2
1	2	2	2	4	2	0	0	1	0	0	1	0	0	1	0	0	1	0	0	1	0	0	1	0	0	1	4	3	4	4	4	5	4	4	4	4	4	1	1	3	1	1	1
2	2	2	1	5	2	0	0	1	0	0	1	0	0	1	0	0	1	1	0	0	0	0	1	0	0	1	4	3	4	2	4	2	2	3	4	4	3	1	4	2	1	1	1
2	2	2	2	1	2	0	0	1	0	0	1	0	0	1	0	0	1	0	0	1	0	0	1	0	0	1	4	1	1	1	1	4	1	1	1	3	3	3	3	4	2	3	1
2	1	2	1	1	2	0	0	1	0	0	1	0	0	1	0	0	1	0	0	1	0	0	1	0	0	1	4	1	1	1	1	1	1	1	2	4	4	1	4	3	1	1	1
1	2	2	3	1	2	0	0	1	0	0	1	0	0	1	0	0	1	0	0	1	0	0	1	0	0	1	3	4	5	3	5	4	5	2	5	4	4	1	3	1	1	1	1
3	3	3	2	1	2	0	0	1	0	0	1	0	0	1	0	0	1	0	0	1	0	0	1	0	0	1	4	4	3	2	2	2	1	2	1	2	2	3	3	4	3	5	1
2	2	2	1	1	2	0	0	1	0	0	1	0	0	1	0	0	1	0	0	1	0	0	1	0	0	1	4	4	4	3	4	4	3	5	5	4	4	1	4	1	1	1	2
2	2	2	1	1	2	0	0	1	0	0	1	0	0	1	0	0	1	0	0	1	0	0	1	0	0	1	4	3	4	3	3	3	3	2	3	4	4	2	4	4	2	2	1
3	3	3	2	1	2	0	0	1	0	0	1	0	0	1	0	0	1	0	0	1	0	0	1	0	0	1	4	3	4	3	3	4	3	3	3	4	4	2	4	2	1	1	1
1	2	2	2	1	2	0	0	1	0	0	1	0	0	1	0	0	1	0	0	1	0	0	1	0	0	1	4	4	5	1	4	4	3	1	4	4	3	2	4	3	2	2	1
3	3	3	1		2	0	0	1	0	0	1	0	0	1	0	0	1	0	0	1	0	0	1	0	0	1	4	5	4	3	5	4	5	4	4	5	5	2	4	3	3	3	1
1	3	3	2	6	2	0	0	1	0	0	1	0	0	1	0	0	1	0	0	1	0	0	1	0	0	1	4	3	5	2	5	5	3	2	2	3	3	1	2	2	1	1	1
2	2	2	3	1	2	0	0	1	0	0	1	0	0	1	0	0	1	0	0	1	0	0	1	0	0	1	4	3	4	2	3	6	6	2	2	2	4	4	4	2	3	3	1
2	2	1	1	1	2	0	0	1	0	0	1	0	0	1	0	0	1	0	0	1	0	0	1	0	0	1	4	3	3	2	4	3	3	2	3	5	4	1	5	4	1	1	7	0	1	0	1	1	1
2	2	2	3	1	2	0	0	1	0	0	1	0	0	1	0	0	1	0	0	1	0	0	1	0	0	1	4	3	4	3	4	4	3	3	4	4	4	2	4	3	2	2	1
1	2	2	2	1	2	0	0	1	0	0	1	0	0	1	0	0	1	0	0	1	0	0	1	0	0	1	4	2	2	3	4	3	3	2	3	2	4	1	2	2	1	1	1
2	2	2	1	1	2	0	0	1	0	0	1	0	0	1	0	0	1	0	0	1	0	0	1	0	0	1	4	1	4	1	4	3	3	2	2	2	2	1	2	2	1	1	1
2	2	2	3	5	2	0	0	1	0	0	1	0	0	1	0	0	1	0	0	1	0	0	1	0	0	1	4	6	6	6	6	6	3	5	5	4	4	2	1	1	1	1	1
2	2	2	1	1	1	0	0	1	0	0	1	0	0	1	0	0	1	1	0	0	0	0	1	0	0	1	1	1	2	1	6	1	1	1	1	3	3	1	3	2	1	1	1
2	2	2	3	1	2	0	0	1	0	0	1	0	0	1	0	0	1	0	0	1	0	0	1	0	0	1	4	3	5	3	6	5	5	2	4	3	3	1	3	3	1	1	1
2	2	2	2	7	2	0	0	1	0	0	1	0	0	1	0	0	1	0	0	1	0	0	1	0	0	1	4	4	4	1	2	4	4	4	4	3	3	3	3	3	2	2	1
3	3	3	3		2	0	0	1	0	0	1	0	0	1	0	0	1	0	0	1	0	0	1	0	0	1	4	4	4	3	4	4	3	3	5	3	3	1	1	2	1	1	8	0	0	0	0	0	1
1	2	2	1	6	2	0	0	1	0	0	1	0	0	1	0	0	1	0	0	1	0	0	1	0	0	1	4	3	3	2	2	2	4	4	4	3	4	1	4	1	1	1	1
2	2	2	3	1	2	0	0	1	0	0	1	0	0	1	0	0	1	0	0	1	0	0	1	0	0	1	4	2	2	2	2	5	3	1	1	2	3	1	1	1	1	1	1
2	2	2	2	1	2	0	0	1	0	0	1	0	0	1	0	0	1	0	0	1	0	0	1	0	0	1	4	3	3	3	6	4	4	2	2	3	3	1	1	2	1	1	1
2	2	2	2	1	2	0	0	1	0	0	1	0	0	1	0	0	1	0	0	1	0	0	1	0	0	1	4	6	4	4	4	5	5	4	4	4	2	4	2	4	3	4	1
2	2	2	1	1	2	0	0	1	0	0	1	0	0	1	0	0	1	0	0	1	0	0	1	0	0	1	4	3	4	4	4	4	4	2	1	3	3	1	4	2	1	1	2
1	1	2	3	1	2	0	0	1	0	0	1	0	0	1	0	0	1	0	0	1	0	0	1	0	0	1	4	3	3	6	6	3	4	3	2	3	3	3	3	3	3	3	1
3	3	3	2		1	0	0	1	0	0	1	0	0	1	0	0	1	0	0	1	0	0	1	0	0	1	4	6	6	3	6	6	6	2	6	4	4	2	2	2	2	1	1
1	2	2	3	1	1	0	0	1	0	0	1	0	0	1	0	0	1	0	0	1	0	0	1	0	0	1	4	1	1	1	1	4	1	1	1	5	5	1	5	3	3	1	1
2	2	2	3	1	2	0	0	1	0	0	1	0	0	1	0	0	1	0	0	1	0	0	1	0	0	1	4	3	4	3	4	5	4	4	3	1	1	1	1	1	1	1	2
2	2	2	2	1	2	0	0	1	0	0	1	0	0	1	0	0	1	0	0	1	0	0	1	0	0	1	4	5	5	5	6	4	5	1	2	4	3	2	4	3	1	1	1
2	2	2	1	1	2	0	0	1	0	0	1	0	0	1	0	0	1	0	0	1	0	0	1	0	0	1	4	3	4	3	3	4	3	3	3	2	3	3	4	3	3	3	1
2	2	2	1	1	2	0	0	1	0	0	1	0	0	1	0	0	1	0	0	1	0	0	1	0	0	1	4	3	3	3	3	4	3	3	4	3	2	2	2	2	2	2	1
1	2	2	1	1	2	0	0	1	0	0	1	0	0	1	0	0	1	0	0	1	0	0	1	0	0	1	4	3	4	3	5	4	3	3	3	4	3	2	5	3	2	2	1
2	2	2	1	1	2	0	0	1	0	0	1	0	0	1	0	0	1	0	0	1	0	0	1	0	0	1	4	6	2	1	6	6	1	1	4	5	4	1	5	4	2	2	1
2	2	2	3	1	2	0	0	1	0	0	1	0	0	1	0	0	1	0	0	1	0	0	1	0	0	1	4	3	4	3	3	4	3	3	4	4	3	2	4	3	2	1	1
3	3	3	1	1	2	0	0	1	0	0	1	0	0	1	0	0	1	0	0	1	0	0	1	0	0	1	4	2	3	2	6	6	6	4	3	4	3	1	3	1	1	1	1
2	2	2	3	1	2	0	0	1	0	0	1	0	0	1	0	0	1	0	0	1	0	0	1	0	0	1	4	3	4	4	4	4	4	3	3	3	3	3	3	4	3	3	1
3	3	3	3		2	0	0	1	0	0	1	0	0	1	0	0	1	0	0	1	0	0	1	0	0	1	4	3	5	4	6	6	6	2	3	4	3	1	3	1	1	1	5
3	3	3	1		2	0	0	1	0	0	1	0	0	1	0	0	1	0	0	1	0	0	1	0	0	1	4	3	3	2	4	3	3	2	4	3	3	1	4	2	1	1	1
1	1	2	3	1	2	0	0	1	0	0	1	0	0	1	0	0	1	0	0	1	0	0	1	0	0	1	4	3	3	3	3	3	3	3	4	3	3	3	3	3	3	3	1
1	2	2	2	1	2	0	0	1	0	0	1	0	0	1	0	0	1	0	0	1	0	0	1	0	0	1	4	2	3	3	3	3	3	3	3	2	3	1	2	2	1	1	1
2	2	2	1	1	2	0	0	1	0	0	1	0	0	1	0	0	1	0	0	1	0	0	1	0	0	1	4	3	3	2	3	4	4	2	2	1	1	1	1	1	1	1	8	0	1	1	1	1	1
2	2	2	3	1	2	0	0	1	0	0	1	0	0	1	0	0	1	0	0	1	0	0	1	0	0	1	4	4	4	4	4	4	4	4	4	4	4	1	2	3	1	1	1
3	2	2	3	5	2	0	0	1	0	0	1	0	0	1	0	0	1	0	0	1	0	0	1	0	0	1	4	3	3	3	4	4	4	2	3	3	3	3	3	3	3	3	1
2	2	2	3	1	2	0	0	1	0	0	1	0	0	1	0	0	1	0	0	1	0	0	1	0	0	1	4	3	3	1	3	1	1	1	1	4	3	2	2	3	1	1	1
2	2	2	1	1	2	0	0	1	0	0	1	0	0	1	0	0	1	0	0	1	0	0	1	0	0	1	4	2	4	3	6	6	6	4	5	4	4	1	1	1	1	1	1
1	2	2	4	1	2	0	0	1	0	0	1	0	0	1	0	0	1	0	0	1	0	0	1	0	0	1	4	4	4	4	4	3	3	3	3	2	4	1	2	2	1	1	3
3	3	3	3		2	0	0	1	0	0	1	0	0	1	0	0	1	0	0	1	0	0	1	0	0	1	4	3	3	1	1	3	1	1	3	4	2	1	4	2	1	1	2
2	2	2	3	1	2	0	0	1	0	0	1	0	0	1	0	0	1	0	0	1	0	0	1	0	0	1	4	4	4	5	3	4	4	5	4	4	3	3	4	4	5	3	1
1	2	2	3	1	1	0	0	1	0	0	1	0	0	1	0	0	1	0	0	1	0	0	1	0	0	1	4	6	6	6	4	5	5	3	3	1	1	1	1	1	1	1	2
2	2	2	2	1	2	0	0	1	0	0	1	0	0	1	0	0	1	0	0	1	0	0	1	0	0	1	4	4	4	2	3	5	5	3	4	4	4	1	2	4	1	1	1
2	2	2	2	1	2	0	0	1	0	0	1	0	0	1	0	0	1	0	0	1	0	0	1	0	0	1	4	4	4	3	4	4	3	3	4	4	3	3	5	3	3	3	1
2	2	2	2	7	2	0	0	1	0	0	1	0	0	1	0	0	1	0	0	1	0	0	1	0	0	1	4	3	3	3	3	4	3	3	3	4	4	3	4	3	3	3	1
2	2	3	2	3	1	0	1	0	0	1	0	1	0	0	1	0	0	1	0	0	1	0	0	1	0	0	1	3	3	2	4	1	2	3	2	2	2	3	2	2	4	2	8	0	0	0	0	0	0
1	1	2	3	5	2	0	0	1	0	0	1	0	0	1	0	0	1	0	0	1	0	0	1	0	0	1	4	1	1	1	1	1	1	1	1	3	3	3	3	3	3	3	6
2	2	2	2	1	2	0	0	1	0	0	1	0	0	1	0	0	1	0	0	1	0	0	1	0	0	1	4	4	4	3	5	4	3	4	4	2	4	1	1	1	1	1	7	1	0	0	0	0	0
3	3	3	1		2	0	0	1	0	0	1	0	0	1	0	0	1	0	0	1	0	0	1	0	0	1	4	3	4	4	4	3	2	4	3	4	3	2	3	2	3	3	1
3	3	3	4		2	0	0	1	0	0	1	0	0	1	0	0	1	0	0	1	0	0	1	0	0	1	4	1	2	3	3	1	2	1	1	2	2	1	1	1	1	1	1
2	2	2	2	1	2	0	0	1	0	0	1	0	0	1	0	0	1	0	0	1	0	0	1	0	0	1	4	4	4	3	5	5	4	3	4	4	3	1	3	3	2	3	1
1	2	2	2	1	2	0	0	1	0	0	1	0	0	1	0	0	1	0	0	1	0	0	1	0	0	1	4	2	4	1	3	4	4	1	1	3	2	1	4	1	1	1	1
1	1	1	3		2	0	0	1	0	0	1	0	0	1	0	0	1	0	0	1	0	0	1	0	0	1	4	3	3	3	3	3	3	3	3	4	4	4	4	4	4	4	2
1	2	2	2	1	2	0	0	1	0	0	1	0	0	1	0	0	1	0	0	1	0	0	1	0	0	1	4	3	4	4	4	4	4	4	3	3	3	3	3	3	3	3	2
1	1	1	1	1	2	0	0	1	0	0	1	0	0	1	0	0	1	0	0	1	0	0	1	0	0	1	4	2	2	2	5	3	3	2	2	3	3	3	3	3	3	3	7	1	0	1	0	0	1
3	3	3	3		2	0	0	1	0	0	1	0	0	1	0	0	1	0	0	1	0	0	1	0	0	1	4	1	3	1	4	3	2	1	1	3	4	2	3	4	2	2	2
1	2	2	4	1	2	0	0	1	0	0	1	0	0	1	0	0	1	0	0	1	0	0	1	0	0	1	4	6	5	5	6	6	6	6	6	5	5	5	5	5	5	5	8	0	0	0	0	0	0
3	3	2	1	1	2	0	0	1	0	0	1	0	0	1	0	0	1	0	0	1	0	0	1	0	0	1	4	3	4	3	3	3	3	3	1	4	3	3	4	4	2	2	1
2	2	1	1	1	2	0	0	1	0	0	1	0	0	1	0	0	1	0	0	1	0	0	1	0	0	1	4	3	4	3	5	4	4	2	2	3	4	2	3	3	2	2	1
3	3	3	3		2	0	0	1	0	0	1	0	0	1	0	0	1	0	0	1	0	0	1	0	0	1	4	3	3	3	3	3	3	3	3	5	5	4	5	4	2	2	2
1	2	2	3	1	2	0	0	1	0	0	1	0	0	1	0	0	1	0	0	1	0	0	1	0	0	1	4	3	4	2	2	3	4	1	1	3	3	1	3	3	3	3	8	0	1	0	0	0	1
1	1	2	2		1	0	0	1	0	0	1	0	0	1	0	0	1	0	0	1	0	0	1	0	0	1	4	3	3	1	3	4	3	2	4	5	4	1	4	4	1	1	2
2	2	2	2	1	2	0	0	1	0	0	1	0	0	1	0	0	1	0	0	1	0	0	1	0	0	1	4	3	4	3	5	3	3	3	4	3	4	2	2	2	1	1	1
3	3	3	1		2	0	0	1	0	0	1	0	0	1	0	0	1	0	0	1	0	0	1	0	0	1	4	4	3	4	6	2	2	4	4	4	3	2	4	2	1	1	7	0	1	0	1	0	1
2	2	2	1	3	1	0	0	1	0	0	1	0	0	1	0	0	1	0	0	1	0	0	1	0	0	1	4	3	5	4	6	6	4	4	4	4	4	1	3	2	1	1	2
2	2	2	2	1	2	0	0	1	0	0	1	0	0	1	0	0	1	0	0	1	0	0	1	0	0	1	4	4	4	4	4	4	4	3	4	1	5	1	1	1	1	1	1
3	3	3	1	1	2	0	0	1	0	0	1	0	0	1	0	0	1	0	0	1	0	0	1	0	0	1	4	4	4	3	4	4	3	3	3	3	4	1	1	4	1	1	1
1	1	2	3	4	2	0	0	1	0	0	1	0	0	1	0	0	1	0	0	1	0	0	1	0	0	1	4	4	4	4	4	4	4	3	3	5	5	4	5	5	4	3	1
1	2	2	2	6	2	0	0	1	0	0	1	0	0	1	0	0	1	0	0	1	0	0	1	0	0	1	4	4	4	3	4	3	3	4	3	4	4	2	3	3	2	2	1
2	1	2	3	1	2	0	0	1	0	0	1	0	0	1	0	0	1	0	0	1	0	0	1	0	0	1	4	4	4	4	6	6	4	4	3	3	3	3	4	3	2	2	1
3	3	3	2		2	0	0	1	0	0	1	0	0	1	0	0	1	0	0	1	0	0	1	0	0	1	4	4	4	3	4	4	3	3	3	3	3	1	4	2	1	1	7	0	1	0	1	0	0
2	2	2	1	1	2	0	0	1	0	0	1	0	0	1	0	0	1	0	0	1	0	0	1	0	0	1	4	2	2	2	4	3	2	4	4	3	4	1	2	1	1	1	1
2	2	2	2	1	2	0	0	1	0	0	1	0	0	1	0	0	1	0	0	1	0	0	1	0	0	1	4	4	4	4	4	3	3	3	3	5	4	3	4	4	3	3	1
2	2	2	1	1	2	0	0	1	0	0	1	0	0	1	0	0	1	0	0	1	0	0	1	0	0	1	4	3	4	1	3	2	2	2	2	4	2	2	2	2	2	2	1
2	2	2	3	1	2	0	0	1	0	0	1	0	0	1	0	0	1	0	0	1	0	0	1	0	0	1	4	3	3	3	4	5	4	2	3	2	4	1	2	1	1	1	1
1	2	2	2	5	2	0	0	1	0	0	1	0	0	1	0	0	1	0	0	1	0	0	1	0	0	1	4	3	4	3	5	4	5	4	3	4	3	1	2	2	1	1	1
2	2	2	2		2	0	0	1	0	0	1	0	0	1	0	0	1	0	0	1	0	0	1	0	0	1	4	3	4	3	4	3	3	2	2	4	4	1	4	4	1	1	7	0	1	0	0	1	1
1	2	2	3	1	2	0	0	1	0	0	1	0	0	1	0	0	1	0	0	1	0	0	1	0	0	1	3	3	3	4	3	3	3	3	3	3	3	3	3	3	3	3	1
2	2	2	2	1	2	0	0	1	0	0	1	0	0	1	0	0	1	0	0	1	0	0	1	0	0	1	4	3	3	3	4	4	3	3	3	4	4	2	4	3	3	2	1
2	2	2	3	4	2	0	0	1	0	0	1	0	0	1	0	0	1	0	0	1	0	0	1	0	0	1	4	3	3	2	3	4	3	2	3	5	5	3	5	4	2	3	1
2	2	2	3	1	2	0	0	1	0	0	1	0	0	1	0	0	1	0	0	1	0	0	1	0	0	1	3	3	3	1	1	3	3	2	2	4	4	1	4	4	1	2	1
2	2	2	2	1	2	0	0	1	0	0	1	0	0	1	0	0	1	0	0	1	0	0	1	0	0	1	4	3	4	4	5	5	4	2	3	4	2	2	3	2	1	1	1
2	2	2	2	1	2	0	0	1	0	0	1	0	0	1	0	0	1	0	0	1	0	0	1	0	0	1	4	3	4	3	4	5	4	3	3	4	5	3	5	4	2	2	1
2	2	2	3	1	2	0	0	1	0	0	1	0	0	1	0	0	1	0	0	1	0	0	1	0	0	1	4	2	2	1	2	2	2	1	2	3	2	2	2	2	2	2	1
1	2	2	1	1	2	0	0	1	0	0	1	0	0	1	0	0	1	0	0	1	0	0	1	0	0	1	4	4	5	4	4	4	1	2	2	2	2	1	1	1	1	1	1
3	3	3	2	1	2	0	0	1	0	0	1	0	0	1	0	0	1	0	0	1	0	0	1	0	0	1	4	3	4	3	4	5	4	4	3	4	3	2	3	3	2	2	1
2	2	2	2	5	2	0	0	1	0	0	1	0	0	1	0	0	1	0	0	1	0	0	1	0	0	1	4	1	4	1	4	2	1	2	2	2	2	1	1	1	1	1	1
2	2	2	3	2	1	0	0	1	0	0	1	0	0	1	0	0	1	0	0	1	0	0	1	0	0	1	4	1	1	1	4	2	3	3	3	1	1	1	1	1	1	1	2
3	3	3	3		2	0	0	1	0	0	1	0	0	1	0	0	1	0	0	1	0	0	1	0	0	1	4	1	4	1	1	5	2	1	4	4	3	1	4	1	1	1	1
2	2	2	3	1	2	0	0	1	0	0	1	0	0	1	0	0	1	0	0	1	0	0	1	0	0	1	4	3	4	3	3	3	3	3	5	4	3	2	3	2	2	2	1
1	2	2	2	3	2	0	1	0	0	0	1	0	0	1	0	0	1	0	0	1	0	0	1	0	0	1	3	4	2	3	3	4	2	2	3	3	2	4	2	2	3	2	8	0	0	0	1	0	1
2	2	2	4	1	2	0	0	1	0	0	1	0	0	1	0	0	1	0	0	1	0	0	1	0	0	1	3	1	2	3	2	2	3	3	4	4	3	1	2	2	2	2	1
3	3	3	2		2	0	0	1	0	0	1	0	0	1	0	0	1	0	0	1	0	0	1	0	0	1	4	2	1	2	1	6	2	2	1	4	4	1	1	2	2	1	7	0	1	0	0	0	1
2	2	2	1	1	2	0	0	1	0	0	1	0	0	1	0	0	1	0	0	1	0	0	1	0	0	1	4	4	4	3	5	4	4	4	4	4	4	1	2	1	1	1	1
2	2	2	2	1	2	0	0	1	0	0	1	0	0	1	0	0	1	0	0	1	0	0	1	0	0	1	2	3	3	3	3	3	3	4	3	4	5	2	3	3	2	2	8	0	1	1	1	1	1
2	2	2	3	5	2	0	0	1	0	0	1	0	0	1	0	0	1	0	0	1	0	0	1	0	0	1	4	3	3	1	4	4	3	3	5	4	4	1	4	3	1	1	1
1	2	2	2	1	2	0	0	1	0	0	1	0	0	1	0	0	1	0	0	1	0	0	1	0	0	1	4	3	3	3	3	3	2	4	3	2	3	2	2	2	2	2	1
2	2	2	3	1	2	0	0	1	0	0	1	0	0	1	0	0	1	0	0	1	0	0	1	0	0	1	4	5	1	5	2	4	4	3	3	3	2	4	5	2	2	3	1
3	3	3	3	1	2	0	0	1	0	0	1	0	0	1	0	0	1	0	0	1	0	0	1	0	0	1	4	3	3	2	4	3	3	3	3	3	3	2	4	4	1	1	1
2	2	2	3	3	2	0	0	1	0	0	1	0	0	1	0	0	1	0	0	1	0	0	1	0	0	1	4	4	4	4	4	5	3	4	3	3	3	3	3	3	3	3	1
2	2	2	3	1	2	0	0	1	0	0	1	0	0	1	0	0	1	0	0	1	0	0	1	0	0	1	4	3	4	3	4	5	4	2	4	4	2	1	2	3	1	1	6
3	1	3	2	1	2	0	0	1	0	0	1	0	0	1	0	0	1	0	0	1	0	0	1	0	0	1	4	4	4	3	4	4	3	3	3	3	3	3	3	3	3	3	7	0	1	0	1	1	0
2	2	2	3	1	1	0	0	1	0	0	1	0	0	1	0	0	1	0	0	1	0	0	1	0	0	1	4	2	2	2	4	3	3	3	4	4	3	1	2	3	1	1	1
2	2	2	2	1	2	0	0	1	0	0	1	0	0	1	0	0	1	0	0	1	0	0	1	0	0	1	4	2	3	2	3	3	3	2	2	5	5	2	4	4	2	2	1
2	2	2	3	1	2	0	0	1	0	0	1	0	0	1	0	0	1	0	0	1	0	0	1	0	0	1	4	5	6	2	2	5	6	3	4	5	5	1	4	3	1	1	1
2	2	2	2	1	1	0	0	1	0	0	1	0	0	1	0	0	1	0	0	1	0	0	1	0	0	1	4	4	4	2	4	5	5	2	3	5	4	2	4	3	4	3	1
1	2	2	3	1	2	0	0	1	0	0	1	0	0	1	0	0	1	0	0	1	0	0	1	0	0	1	4	4	4	3	4	4	3	4	4	2	4	2	2	2	2	1	1
3	3	3	3		1	0	0	1	0	0	1	0	0	1	0	0	1	0	0	1	0	0	1	0	0	1	4	4	4	3	4	3	2	3	3	4	3	1	5	3	1	1	1
1	2	2	1	5	2	0	0	1	0	0	1	0	0	1	0	0	1	0	0	1	0	0	1	0	0	1	4	1	4	1	6	5	4	2	2	4	4	2	5	4	2	1	1
2	2	2	1	6	2	0	0	1	0	0	1	0	0	1	0	0	1	0	0	1	0	0	1	0	0	1	4	4	4	2	2	6	3	3	3	5	5	2	3	5	2	2	1
2	2	2	4	5	2	0	0	1	0	0	1	0	0	1	0	0	1	0	0	1	0	0	1	0	0	1	4	2	3	2	2	2	2	2	1	3	3	1	3	3	3	3	1
1	2	2	2	1	2	0	0	1	0	0	1	0	0	1	0	0	1	0	0	1	0	0	1	0	0	1	4	3	4	3	5	3	4	3	4	3	2	1	1	2	1	1	1
2	2	2	2	5	2	0	0	1	0	0	1	0	0	1	0	0	1	0	0	1	0	0	1	0	0	1	4	3	4	1	6	3	3	3	3	5	5	1	5	5	1	1	1
1	3	1	1	7	2	0	0	1	0	0	1	0	0	1	0	0	1	0	0	1	0	0	1	0	0	1	1	1	6	1	6	1	1	6	6	5	5	1	4	3	1	1	8	0	1	0	1	1	1
3	3	3	2		2	0	0	1	0	0	1	0	0	1	0	0	1	0	0	1	0	0	1	0	0	1	4	4	4	4	4	4	4	3	3	4	3	2	4	3	2	2	8	0	1	0	0	0	0
2	2	2	3	1	2	0	0	1	0	0	1	0	0	1	0	0	1	0	0	1	0	0	1	0	0	1	4	3	3	3	6	3	2	2	4	5	5	1	5	4	2	2	1
2	2	2	2	6	2	0	0	1	0	0	1	0	0	1	0	0	1	0	0	1	0	0	1	0	0	1	4	2	3	3	4	3	4	3	3	4	3	1	3	1	1	1	1
1	1	2	3	7	2	0	0	1	0	0	1	0	0	1	0	0	1	0	0	1	0	0	1	0	0	1	4	3	3	3	5	2	4	1	3	5	3	1	1	1	1	1	1
2	2	2	2	6	2	0	0	1	0	0	1	0	0	1	0	0	1	0	0	1	0	0	1	0	0	1	4	5	5	3	5	5	5	3	2	4	3	2	4	3	2	2	1
1	2	2	3	1	2	0	0	1	0	0	1	0	0	1	0	0	1	0	0	1	0	0	1	0	0	1	4	3	3	3	4	5	3	3	3	4	4	1	1	1	1	1	1
1	2	2	3	3	2	0	0	1	0	0	1	0	0	1	0	0	1	0	0	1	0	0	1	0	0	1	3	3	3	3	3	3	3	3	3	4	3	2	3	2	2	1	1
2	1	2	3	1	2	0	0	1	0	0	1	0	0	1	0	0	1	0	0	1	0	0	1	0	0	1	4	2	2	1	4	2	2	4	6	4	3	1	4	3	1	1	1
2	2	2	3	1	2	0	0	1	0	0	1	0	0	1	0	0	1	0	0	1	0	0	1	0	0	1	4	1	5	3	4	4	4	3	3	4	4	2	4	4	2	2	1
2	2	2	2	1	2	0	0	1	0	0	1	0	0	1	0	0	1	0	0	1	0	0	1	0	0	1	4	3	4	4	5	1	2	2	2	4	4	2	3	3	1	1	1
1	2	2	2	1	2	0	0	1	0	0	1	0	0	1	0	0	1	0	0	1	0	0	1	0	0	1	4	2	4	3	6	1	2	2	2	3	3	2	3	3	2	2	1
3	3	3	1		2	0	0	1	0	0	1	0	0	1	0	0	1	0	0	1	0	0	1	0	0	1	4	2	2	1	6	3	3	3	3	5	3	1	5	1	1	1	1
3	2	3	2	3	2	0	0	1	0	0	1	0	0	1	0	0	1	0	0	1	0	0	1	0	0	1	2	3	3	2	2	2	2	3	2	3	2	3	3	2	4	2	1
2	2	2	3	4	2	0	0	1	0	0	1	0	0	1	0	0	1	0	0	1	0	0	1	0	0	1	4	3	3	3	3	3	3	3	3	3	3	3	3	3	3	3	6
1	2	2	3	1	2	0	0	1	0	0	1	0	0	1	0	0	1	0	0	1	0	0	1	0	0	1	2	1	1	1	3	2	1	1	1	4	3	1	1	1	1	1	1
3	3	3	1		2	0	0	1	0	0	1	0	0	1	0	0	1	0	0	1	0	0	1	0	0	1	4	3	4	5	5	3	4	3	2	4	5	2	4	4	2	2	1
2	2	2	2	1	2	0	0	1	0	0	1	0	0	1	0	0	1	0	0	1	0	0	1	0	0	1	4	4	3	2	4	3	4	1	3	4	3	1	4	4	1	1	7	0	1	0	0	0	1
3	1	3	3	1	2	0	0	1	0	0	1	0	0	1	0	0	1	0	0	1	0	0	1	0	0	1	4	3	3	3	1	3	1	1	1	3	4	1	3	2	2	2	1
3	3	3	1	1	2	0	0	1	0	0	1	0	0	1	0	0	1	0	0	1	0	0	1	0	0	1	4	5	5	4	5	3	3	3	3	3	3	3	4	3	2	2	7	0	1	0	0	0	0
3	3	3	3		1	0	0	1	0	0	1	0	0	1	0	0	1	0	0	1	0	0	1	0	0	1	3	2	3	1	3	3	3	1	2	4	2	1	4	3	1	2	1
2	2	2	3	1	2	0	0	1	0	0	1	0	0	1	0	0	1	0	0	1	0	0	1	0	0	1	4	5	4	4	4	5	4	4	3	4	4	2	3	4	2	2	1
2	2	2	2	1	2	0	0	1	0	0	1	0	0	1	0	0	1	0	0	1	0	0	1	0	0	1	4	2	2	2	5	6	5	5	2	2	2	1	2	2	1	1	1
2	2	2	2	3	2	0	0	1	0	0	1	0	0	1	0	0	1	0	0	1	0	0	1	0	0	1	4	1	2	1	4	4	4	1	1	4	4	1	4	3	1	1	1
2	2	1	1	1	2	0	0	1	0	0	1	0	0	1	0	0	1	0	0	1	0	0	1	0	0	1	4	3	3	3	3	3	1	4	4	4	4	1	3	3	1	1	1
2	2	2	2	6	2	0	0	1	0	0	1	0	0	1	0	0	1	0	0	1	0	0	1	0	0	1	4	1	1	1	1	2	1	1	1	4	1	1	1	4	1	1	1
2	2	2	2	1	2	0	0	1	0	0	1	0	0	1	0	0	1	0	0	1	0	0	1	0	0	1	4	3	3	3	3	3	3	3	3	3	3	3	3	3	3	3	1
2	2	2	2	1	2	0	0	1	0	0	1	0	0	1	0	0	1	0	0	1	0	0	1	0	0	1	4	2	2	2	2	2	2	2	2	4	4	4	4	4	4	4	1
1	1	2	3	1	2	0	0	1	0	0	1	0	0	1	0	0	1	0	0	1	0	0	1	0	0	1	4	5	6	5	4	6	5	5	5	4	4	2	5	5	4	4	1
1	2	2	2	3	2	0	0	1	0	0	1	0	0	1	0	0	1	0	0	1	0	0	1	0	0	1	4	3	3	3	4	2	4	4	4	2	2	2	2	2	2	2	1
1	1	2	1	1	2	0	0	1	0	0	1	0	0	1	0	0	1	0	0	1	0	0	1	0	0	1	4	4	6	3	5	5	6	3	3	5	5	1	5	4	1	3	7	0	1	1	0	0	0
3	3	3	2		2	0	0	1	0	0	1	0	0	1	0	0	1	0	0	1	0	0	1	0	0	1	4	3	4	4	4	4	4	3	4	2	2	1	4	3	2	1	1
2	2	2	2	1	2	0	0	1	0	0	1	0	0	1	0	0	1	0	0	1	0	0	1	0	0	1	4	4	3	2	5	4	5	3	4	5	4	1	4	4	2	3	1
3	3	3	1		1	0	0	1	0	0	1	0	0	1	0	0	1	0	0	1	0	0	1	0	0	1	4	1	2	1	6	1	1	1	1	4	4	1	2	3	1	1	2
1	1	2	2	1	2	0	0	1	0	0	1	0	0	1	0	0	1	0	0	1	0	0	1	0	0	1	4	1	5	4	3	3	4	2	4	4	3	1	2	3	1	1	1
2	2	2	1	1	2	0	0	1	0	0	1	0	0	1	0	0	1	0	0	1	0	0	1	0	0	1	4	3	3	3	4	4	4	3	4	4	4	2	4	4	2	1	8	0	0	0	0	0	0
3	3	1	2		2	0	0	1	0	0	1	0	0	1	0	0	1	0	0	1	0	0	1	0	0	1	4	4	6	3	5	5	4	3	3	4	4	2	4	3	2	2	1
2	2	2	2	1	2	0	0	1	0	0	1	0	0	1	0	0	1	0	0	1	0	0	1	0	0	1	4	4	4	4	4	2	4	2	1	1	4	1	1	1	1	1	8	0	0	0	0	0	1
1	3	3	4	7	2	0	0	1	0	0	1	0	0	1	0	0	1	0	0	1	0	0	1	0	0	1	3	3	4	3	4	4	3	3	3	2	5	2	1	1	1	1	1
1	2	2	2	5	2	0	0	1	0	0	1	0	0	1	0	0	1	0	0	1	0	0	1	0	0	1	4	4	4	3	3	5	4	1	3	4	4	1	1	1	1	1	1
3	3	3	2		1	0	0	1	0	0	1	0	0	1	0	0	1	0	0	1	0	0	1	0	0	1	4	3	3	3	3	3	3	3	3	4	4	2	4	3	3	3	2
2	2	2	2	1	2	0	0	1	0	0	1	0	0	1	0	0	1	0	0	1	0	0	1	0	0	1	4	4	4	2	6	4	2	1	4	3	2	1	2	1	1	1	1
1	2	2	1	2	2	0	0	1	0	0	1	0	0	1	0	0	1	0	0	1	0	0	1	0	0	1	4	4	4	4	4	4	4	1	4	4	4	2	2	2	1	1	1
3	3	3	3		2	0	0	1	0	0	1	0	0	1	0	0	1	0	0	1	0	0	1	0	0	1	4	2	4	2	4	3	3	2	2	5	5	5	5	5	4	5	2
2	2	2	3	2	2	0	0	1	0	0	1	0	0	1	0	0	1	0	0	1	0	0	1	0	0	1	4	4	4	3	3	3	2	4	3	3	3	3	3	3	3	3	3
1	2	2	2	1	2	0	0	1	0	0	1	0	0	1	0	0	1	0	0	1	0	0	1	0	0	1	4	3	3	3	5	5	3	3	3	1	1	1	1	1	1	1	6
3	3	3	1		2	0	0	1	0	0	1	0	0	1	0	0	1	0	0	1	0	0	1	0	0	1	4	3	3	1	6	1	1	1	1	4	5	1	5	1	1	1	2
2	2	2	1	1	2	0	0	1	0	0	1	0	0	1	0	0	1	0	0	1	0	0	1	0	0	1	4	5	5	3	6	6	6	6	6	2	1	1	1	1	1	1	6
3	3	3	4		2	0	0	1	0	0	1	0	0	1	0	0	1	0	0	1	0	0	1	0	0	1	4	3	3	3	2	4	3	2	1	3	3	1	1	3	1	1	8	0	0	0	0	0	1
2	2	2	2	1	2	0	0	1	0	0	1	0	0	1	0	0	1	0	0	1	0	0	1	0	0	1	4	3	4	2	1	2	1	4	4	4	4	2	4	3	2	2	1
3	3	3	2		2	0	0	1	0	0	1	0	0	1	0	0	1	0	0	1	0	0	1	0	0	1	4	3	3	2	4	3	2	1	2	4	4	1	4	2	1	1	1
1	2	2	1	1	2	0	0	1	0	0	1	0	0	1	0	0	1	0	0	1	0	0	1	0	0	1	4	4	1	1	4	1	1	1	1	5	5	5	5	5	1	5	1
2	2	2	3	6	2	0	0	1	0	0	1	0	0	1	0	0	1	0	0	1	0	0	1	0	0	1	4	3	4	2	3	3	3	2	2	3	3	3	3	3	3	3	2
1	1	1	1		2	0	0	1	0	0	1	0	0	1	0	0	1	0	0	1	0	0	1	0	0	1	4	3	4	3	4	4	4	3	3	3	2	2	3	4	3	2	1
1	2	2	1	3	2	0	0	1	0	0	1	0	0	1	0	0	1	0	0	1	0	0	1	0	0	1	4	1	4	1	5	1	1	1	2	3	4	1	3	4	2	2	2
2	2	2	3	2	2	0	0	1	0	0	1	0	0	1	0	0	1	0	0	1	0	0	1	0	0	1	4	2	2	2	2	2	2	2	2	4	4	4	4	4	4	4	1
2	2	2	2	1	1	0	0	1	0	0	1	0	0	1	0	0	1	0	0	1	0	0	1	0	0	1	4	1	4	3	3	4	3	2	2	4	3	3	4	3	3	2	2
2	2	2	2	1	2	0	0	1	0	0	1	0	0	1	0	0	1	0	0	1	0	0	1	0	0	1	4	3	6	3	6	5	5	4	3	4	4	2	4	2	2	2	7	1	1	0	0	0	0
2	2	2	3	1	2	0	0	1	0	0	1	0	0	1	0	0	1	0	0	1	0	0	1	0	0	1	4	3	4	1	4	4	3	1	1	4	3	1	3	2	1	1	1
1	2	2	3	1	2	0	0	1	0	0	1	0	0	1	0	0	1	0	0	1	0	0	1	0	0	1	4	4	4	2	4	2	2	1	2	5	4	1	4	2	2	1	1
1	2	2	3	1	2	0	0	1	0	0	1	0	0	1	0	0	1	0	0	1	0	0	1	0	0	1	4	2	2	3	3	4	2	2	3	4	4	2	4	3	2	2	1
1	3	2	3	1	2	0	0	1	0	0	1	0	0	1	0	0	1	0	0	1	0	0	1	0	0	1	4	6	5	4	2	3	4	3	5	3	1	1	1	1	1	1	7	1	1	0	0	0	0
2	2	2	2	1	2	0	0	1	0	0	1	0	0	1	0	0	1	0	0	1	0	0	1	0	0	1	4	3	3	3	3	3	3	3	3	4	3	1	1	3	1	1	6
2	2	2	2	1	2	0	0	1	0	0	1	0	0	1	0	0	1	0	0	1	0	0	1	0	0	1	4	2	4	2	4	5	2	4	5	4	2	2	3	2	3	2	2
1	2	2	4	5	2	0	0	1	0	0	1	0	0	1	0	0	1	0	0	1	0	0	1	0	0	1	4	3	3	3	3	3	3	3	3	3	3	3	3	3	3	3	1
1	2	2	1	5	2	0	0	1	0	0	1	0	0	1	0	0	1	0	0	1	0	0	1	0	0	1	4	4	4	4	4	5	4	2	4	4	3	3	4	3	1	1	1
1	2	2	3	1	1	0	0	1	0	0	1	0	0	1	0	0	1	0	0	1	0	0	1	0	0	1	4	4	4	3	3	4	2	3	3	4	3	1	2	3	1	1	1
2	2	2	2	1	2	0	0	1	0	0	1	0	0	1	0	0	1	0	0	1	0	0	1	0	0	1	4	2	4	2	5	4	4	2	2	4	4	1	4	4	1	1	1
1	2	2	3	4	2	0	0	1	0	0	1	0	0	1	0	0	1	0	0	1	0	0	1	0	0	1	4	4	4	1	4	6	6	4	1	2	2	1	2	2	1	1	5
2	2	2	1	1	2	0	0	1	0	0	1	0	0	1	0	0	1	0	0	1	0	0	1	0	0	1	4	3	4	3	5	5	4	4	5	3	3	2	3	3	2	2	1
1	1	1	1	1	2	0	0	1	0	0	1	0	0	1	0	0	1	0	0	1	0	0	1	0	0	1	4	4	5	1	5	5	4	1	2	4	5	2	4	2	1	1	7	0	1	1	1	1	0
2	2	2	3	2	2	0	0	1	0	0	1	0	0	1	0	0	1	0	0	1	0	0	1	0	0	1	4	1	1	1	1	1	1	2	1	3	3	3	4	3	2	3	1
2	2	1	2	7	2	0	0	1	0	0	1	0	0	1	0	0	1	0	0	1	0	0	1	0	0	1	4	2	2	2	4	5	6	6	5	2	3	2	3	2	1	1	1
3	3	3	1		2	0	0	1	0	0	1	0	0	1	0	0	1	0	0	1	0	0	1	0	0	1	4	3	4	2	5	5	3	2	2	5	4	1	3	4	1	1	2
2	2	2	2	1	2	0	0	1	0	0	1	0	0	1	0	0	1	0	0	1	0	0	1	0	0	1	4	3	3	3	3	3	3	3	3	4	4	3	3	3	3	3	2
3	3	3	1		2	0	0	1	0	0	1	0	0	1	0	0	1	0	0	1	0	0	1	0	0	1	4	3	3	3	3	3	3	3	3	4	4	4	4	3	3	3	7	0	1	0	1	0	1
2	2	2	1	7	2	0	0	1	0	0	1	0	0	1	0	0	1	0	0	1	0	0	1	0	0	1	4	2	2	2	4	4	3	1	3	5	4	3	5	4	2	2	1
1	2	2	1	1	2	0	0	1	0	0	1	0	0	1	0	0	1	0	0	1	0	0	1	0	0	1	4	4	4	4	5	5	5	4	3	4	4	2	4	4	2	2	1
1	2	2	2	1	2	0	0	1	0	0	1	0	0	1	0	0	1	0	0	1	0	0	1	0	0	1	4	6	4	3	3	6	1	2	2	4	3	2	4	3	2	4	1
3	3	3	3		2	0	0	1	0	0	1	0	0	1	0	0	1	0	0	1	0	0	1	0	0	1	4	3	3	3	4	3	4	2	3	4	4	1	4	2	2	2	1
2	2	2	2	3	2	0	0	1	0	0	1	0	0	1	0	0	1	0	0	1	0	0	1	0	0	1	4	3	4	3	4	6	3	4	1	3	4	4	4	4	4	4	1
1	2	2	1	1	2	0	0	1	0	0	1	0	0	1	0	0	1	0	0	1	0	0	1	0	0	1	2	4	3	3	4	6	4	3	2	4	4	1	3	3	1	2	1
2	2	2	2	7	2	0	0	1	0	0	1	0	0	1	0	0	1	0	0	1	0	0	1	0	0	1	4	1	2	1	5	3	3	3	2	2	4	1	1	1	1	1	8	0	1	1	0	0	1
2	2	2	2	3	2	0	0	1	0	0	1	0	0	1	0	0	1	0	0	1	0	0	1	0	0	1	4	6	6	6	5	4	4	3	3	3	3	3	3	3	3	3	1
2	2	2	1	1	2	0	0	1	0	0	1	0	0	1	0	0	1	0	0	1	0	0	1	0	0	1	4	4	5	2	2	4	4	2	4	5	4	1	4	3	1	1	1
2	2	2	2	1	2	0	0	1	0	0	1	0	0	1	0	0	1	0	0	1	0	0	1	0	0	1	4	6	3	3	4	3	3	2	5	2	1	4	1	1	2	1	1
3	3	3	2		2	0	0	1	0	0	1	0	0	1	0	0	1	0	0	1	0	0	1	0	0	1	4	3	3	2	3	3	3	1	4	4	4	2	4	4	2	2	1
2	2	2	3	1	2	0	0	1	0	0	1	0	0	1	0	0	1	0	0	1	0	0	1	0	0	1	4	3	4	2	3	3	3	3	3	3	3	1	3	1	1	1	1
2	2	2	4	1	2	0	0	1	0	0	1	0	0	1	0	0	1	0	0	1	0	0	1	0	0	1	4	3	3	3	3	4	3	3	3	3	2	2	2	2	2	1	1
2	2	2	2	1	2	0	0	1	0	0	1	0	0	1	0	0	1	0	0	1	0	0	1	0	0	1	4	1	1	1	6	2	2	2	1	5	2	2	2	3	1	1	1
3	3	3	2		2	0	0	1	0	0	1	0	0	1	0	0	1	0	0	1	0	0	1	0	0	1	4	3	3	3	4	4	2	2	3	5	5	2	4	4	2	2	1
1	2	2	1	1	2	0	0	1	0	0	1	0	0	1	0	0	1	0	0	1	0	0	1	0	0	1	4	3	3	3	3	4	1	1	1	3	4	1	2	3	1	1	1
3	3	3	3		2	0	0	1	0	0	1	0	0	1	0	0	1	0	0	1	0	0	1	0	0	1	4	3	4	4	5	5	5	3	4	3	3	3	3	3	3	3	1
2	2	2	3	5	2	0	0	1	0	0	1	0	0	1	0	0	1	0	0	1	0	0	1	0	0	1	4	4	5	5	5	5	5	5	5	4	4	3	4	5	2	2	1
2	2	2	3	1	2	0	0	1	0	0	1	0	0	1	0	0	1	0	0	1	0	0	1	0	0	1	4	1	4	1	1	4	1	1	1	4	3	1	2	4	1	1	1
1	1	2	2	1	2	0	0	1	0	0	1	0	0	1	0	0	1	0	0	1	0	0	1	0	0	1	4	3	4	4	4	4	4	5	4	4	4	2	4	4	3	4	1
2	2	2	2	1	2	0	0	1	0	0	1	0	0	1	0	0	1	0	0	1	0	0	1	0	0	1	4	1	1	1	2	1	4	1	2	1	1	1	4	1	1	1	6
3	1	2	3	1	2	0	0	1	0	0	1	0	0	1	0	0	1	0	0	1	0	0	1	0	0	1	4	1	1	1	1	1	1	1	1	4	2	1	1	1	1	1	1
2	2	1	4	1	1	0	0	1	0	0	1	0	0	1	0	0	1	0	0	1	0	0	1	0	0	1	4	2	3	1	4	1	2	2	2	4	3	4	3	4	4	4	1
2	2	2	3	1	2	0	0	1	0	0	1	0	0	1	0	0	1	0	0	1	0	0	1	0	0	1	4	4	4	4	4	4	4	1	1	3	3	3	3	3	3	3	2
2	2	2	1	7	2	0	0	1	0	0	1	0	0	1	0	0	1	0	0	1	0	0	1	0	0	1	4	2	2	1	1	4	3	1	1	5	4	2	5	3	1	1	1
2	2	2	2	1	2	0	0	1	0	0	1	0	0	1	0	0	1	0	0	1	0	0	1	0	0	1	4	1	1	1	1	3	1	2	2	3	3	2	3	3	2	2	1
1	2	2	2	1	2	0	0	1	0	0	1	0	0	1	0	0	1	0	0	1	0	0	1	0	0	1	4	3	4	3	5	4	3	3	3	4	4	3	4	4	2	2	1
3	3	3	3		2	0	0	1	0	0	1	0	0	1	0	0	1	0	0	1	0	0	1	0	0	1	4	3	4	4	5	4	3	3	3	3	3	3	3	3	3	3	7	0	1	0	0	0	0
1	2	2	3	1	2	0	0	1	0	0	1	0	0	1	0	0	1	0	0	1	0	0	1	0	0	1	4	3	2	2	5	2	2	1	1	4	2	1	1	2	1	1	1
3	3	3	2	1	2	0	0	1	0	0	1	0	0	1	0	0	1	0	0	1	0	0	1	0	0	1	4	1	2	2	5	2	3	3	3	2	2	2	3	2	2	2	1
2	2	2	1	3	2	1	0	0	0	0	1	1	0	0	0	0	1	1	0	0	0	0	1	1	0	0	4	4	4	3	4	5	3	1	1	4	4	3	4	4	3	3	1
2	2	2	2	6	2	0	0	1	0	0	1	0	0	1	0	0	1	0	0	1	0	0	1	0	0	1	4	2	2	2	2	2	2	2	2	3	3	1	3	1	1	1	1
2	2	2	1	1	2	0	0	1	0	0	1	0	0	1	0	0	1	0	0	1	0	0	1	0	0	1	4	2	3	3	3	4	4	3	3	4	4	2	3	3	1	1	1
2	2	2	2	6	2	0	0	1	0	0	1	0	0	1	0	0	1	0	0	1	0	0	1	0	0	1	4	3	4	3	2	2	2	2	3	4	4	1	1	1	1	1	2
2	2	2	3	5	2	0	0	1	0	0	1	0	0	1	0	0	1	0	0	1	0	0	1	0	0	1	4	3	3	3	3	2	3	3	2	4	3	2	4	3	2	2	1
1	2	2	2	1	2	0	0	1	0	0	1	0	0	1	0	0	1	0	0	1	0	0	1	0	0	1	4	5	5	5	5	5	5	5	5	2	3	1	1	1	1	1	1
2	2	2	3	1	1	0	0	1	0	0	1	0	0	1	0	0	1	0	0	1	0	0	1	0	0	1	4	5	2	3	3	4	4	4	3	4	2	3	4	3	4	3	1
2	2	2	2	1	2	0	0	1	0	0	1	0	0	1	0	0	1	0	0	1	0	0	1	0	0	1	4	3	4	3	4	4	3	3	3	3	2	2	2	2	2	2	1
3	3	3	2		2	0	0	1	0	0	1	0	0	1	0	0	1	0	0	1	0	0	1	0	0	1	4	4	4	3	5	5	5	3	3	4	3	1	4	2	1	1	1
2	2	2	2	1	2	0	0	1	0	0	1	0	0	1	0	0	1	0	0	1	0	0	1	0	0	1	4	4	4	4	4	4	4	4	4	4	3	2	3	3	2	2	1
2	2	2	2	5	2	1	0	0	1	0	0	0	0	1	1	0	0	1	0	0	1	0	0	1	0	0	4	4	4	3	5	5	3	3	3	3	3	2	4	2	2	2	6
2	2	2	3	1	2	0	0	1	0	0	1	0	0	1	0	0	1	0	0	1	0	0	1	0	0	1	4	3	3	3	3	4	5	3	4	4	4	3	3	3	3	2	8	0	0	0	0	0	0
2	2	2	2	1	2	0	0	1	0	0	1	0	0	1	0	0	1	0	0	1	0	0	1	0	0	1	4	3	3	2	4	2	2	2	4	4	2	1	2	1	1	1	1
1	2	2	2	5	2	0	0	1	0	0	1	0	0	1	0	0	1	0	0	1	0	0	1	0	0	1	4	4	6	3	4	4	3	3	3	4	4	2	2	4	2	2	1
1	2	2	2	1	2	0	0	1	0	0	1	0	0	1	0	0	1	0	0	1	0	0	1	0	0	1	4	1	2	1	4	4	4	2	2	4	1	1	3	1	1	1	1
2	2	2	2	1	2	0	0	1	0	0	1	0	0	1	0	0	1	0	0	1	0	0	1	0	0	1	4	3	3	3	4	4	4	3	3	1	1	1	1	1	1	1	8	0	0	0	0	0	0
1	1	1	1	5	2	0	0	1	0	0	1	0	0	1	0	0	1	0	0	1	0	0	1	0	0	1	3	3	3	2	2	1	2	1	4	4	5	1	4	4	2	1	8	0	1	0	0	0	0
2	2	2	2	3	2	0	0	1	0	0	1	0	0	1	0	0	1	0	0	1	0	0	1	0	0	1	4	3	4	3	3	4	3	3	3	4	3	3	4	3	3	3	1
2	2	2	3	1	2	0	0	1	0	0	1	0	0	1	0	0	1	0	0	1	0	0	1	0	0	1	4	3	3	3	3	3	3	3	3	2	3	3	3	3	3	3	1
2	2	2	1	1	2	0	0	1	0	0	1	0	0	1	0	0	1	0	0	1	0	0	1	0	0	1	4	5	4	3	5	4	1	4	4	4	4	1	4	3	1	1	1
1	1	1	2		2	0	0	1	0	0	1	0	0	1	0	0	1	0	0	1	0	0	1	0	0	1	4	5	5	4	2	4	3	3	4	5	4	3	5	3	3	2	1
1	1	2	3	1	2	0	0	1	0	0	1	0	0	1	0	0	1	0	0	1	0	0	1	0	0	1	4	4	4	4	4	3	3	3	3	4	4	2	2	4	2	2	1
1	2	2	3	1	2	0	0	1	0	0	1	0	0	1	0	0	1	0	0	1	0	0	1	0	0	1	4	3	4	3	6	6	5	3	4	1	1	1	1	1	1	1	1
3	3	3	3		2	0	0	1	0	0	1	0	0	1	0	0	1	0	0	1	0	0	1	0	0	1	4	4	4	3	4	4	3	1	1	3	3	1	3	1	1	1	6
3	3	3	3	1	2	0	0	1	0	0	1	0	0	1	0	0	1	0	0	1	0	0	1	0	0	1	4	4	4	4	2	4	3	4	5	3	3	3	3	3	3	3	2
2	2	2	2	1	2	0	0	1	0	0	1	0	0	1	0	0	1	0	0	1	0	0	1	0	0	1	4	1	1	1	4	1	1	1	1	4	4	1	4	3	1	1	1
2	1	2	2	4	2	0	0	1	0	0	1	0	0	1	0	0	1	0	0	1	0	0	1	0	0	1	4	3	4	4	3	4	4	3	3	3	5	3	3	3	3	3	4
2	2	2	3	1	2	0	0	1	0	0	1	0	0	1	0	0	1	0	0	1	0	0	1	0	0	1	4	6	5	3	3	4	1	1	3	5	4	1	5	3	4	4	8	0	0	0	1	0	0
1	2	2	4	1	2	0	0	1	0	0	1	0	0	1	0	0	1	0	0	1	0	0	1	0	0	1	4	4	3	3	3	5	3	2	2	4	3	2	4	3	2	2	1
2	2	1	3	1	2	0	0	1	0	0	1	0	0	1	0	0	1	0	0	1	0	0	1	0	0	1	4	3	3	3	4	4	4	3	3	2	3	2	3	2	2	3	7	1	1	0	0	0	0
1	2	2	2	1	2	0	0	1	0	0	1	0	0	1	0	0	1	0	0	1	0	0	1	0	0	1	4	4	3	4	4	1	3	3	3	4	4	1	4	2	1	2	1
2	2	2	2	2	2	0	0	1	0	0	1	0	0	1	0	0	1	0	0	1	0	0	1	0	0	1	4	4	5	4	5	6	5	3	4	4	4	2	3	3	2	2	1
3	3	3	2		2	0	0	1	0	0	1	0	0	1	0	0	1	0	0	1	0	0	1	0	0	1	4	1	1	1	6	1	2	1	2	4	4	1	4	2	1	1	8	0	1	0	0	0	1
2	2	2	3	1	2	0	0	1	0	0	1	0	0	1	0	0	1	0	0	1	0	0	1	0	0	1	4	6	4	3	3	3	4	3	3	5	5	4	4	3	4	3	1
2	2	2	2	7	2	0	0	1	0	0	1	0	0	1	0	0	1	0	0	1	0	0	1	0	0	1	4	3	4	3	6	2	3	2	2	4	3	2	4	4	1	1	1
2	2	2	2	1	2	0	0	1	0	0	1	0	0	1	0	0	1	0	0	1	0	0	1	0	0	1	4	2	3	2	3	2	3	1	1	4	3	1	4	3	2	1	1
1	2	2	4	3	2	0	0	1	0	0	1	0	0	1	0	0	1	0	0	1	0	0	1	0	0	1	1	3	4	5	5	4	5	5	4	3	2	2	3	1	2	3	1
2	2	2	1	1	2	0	0	1	0	0	1	0	0	1	0	0	1	0	0	1	0	0	1	0	0	1	4	4	4	4	4	5	3	1	3	4	4	2	4	3	1	1	1
2	2	2	2	1	2	0	0	1	0	0	1	0	0	1	0	0	1	0	0	1	0	0	1	0	0	1	4	5	4	4	3	4	3	4	3	4	4	2	3	3	4	3	1
2	2	2	2	2	2	0	0	1	0	0	1	0	0	1	0	0	1	0	0	1	0	0	1	0	0	1	4	4	4	3	3	5	4	3	4	4	4	2	3	2	2	2	1
2	2	2	3	3	2	0	0	1	0	0	1	0	0	1	0	0	1	0	0	1	0	0	1	0	0	1	4	1	1	1	1	1	1	1	1	3	3	3	3	2	3	3	1
2	2	2	2	1	2	0	0	1	0	0	1	0	0	1	0	0	1	0	0	1	0	0	1	0	0	1	4	3	4	3	4	4	4	3	3	4	3	2	3	3	3	3	1
2	2	2	1	1	2	0	0	1	0	0	1	0	0	1	0	0	1	0	0	1	0	0	1	0	0	1	4	3	3	1	4	4	1	1	3	4	4	2	4	3	1	1	1
1	2	2	4	4	2	0	0	1	0	0	1	0	0	1	0	0	1	0	0	1	0	0	1	0	0	1	4	1	1	1	1	1	1	1	1	1	1	1	1	1	1	1	6
1	2	2	1	1	2	0	0	1	0	0	1	0	0	1	0	0	1	0	0	1	0	0	1	0	0	1	4	3	4	3	4	5	3	2	2	5	3	2	5	2	2	2	1
2	2	2	2	1	2	0	0	1	0	0	1	0	0	1	0	0	1	0	0	1	0	0	1	0	0	1	4	4	4	3	5	4	2	2	2	4	3	3	3	3	3	3	1
3	3	3	1		2	0	0	1	0	0	1	0	0	1	0	0	1	0	0	1	0	0	1	0	0	1	4	3	3	3	4	4	3	3	4	3	3	1	4	2	1	1	6
3	3	3	1		2	0	0	1	0	0	1	0	0	1	0	0	1	0	0	1	0	0	1	0	0	1	1	3	3	1	4	3	3	2	1	4	4	1	4	2	1	1	8	0	1	0	1	1	1
1	2	1	3	1	2	0	0	1	0	0	1	0	0	1	0	0	1	0	0	1	0	0	1	0	0	1	4	2	2	2	5	2	3	1	2	4	4	1	3	4	1	2	1
2	2	2	1	1	1	0	0	1	0	0	1	0	0	1	0	0	1	0	0	1	0	0	1	0	0	1	4	5	5	3	6	3	3	3	3	4	2	1	4	4	1	1	2
2	2	2	2	1	2	0	0	1	0	0	1	0	0	1	0	0	1	0	0	1	0	0	1	0	0	1	4	2	1	1	5	3	4	3	3	4	4	1	3	1	1	1	1
2	2	2	2	1	2	0	0	1	0	0	1	0	0	1	0	0	1	0	0	1	0	0	1	0	0	1	4	4	4	3	5	3	3	5	5	2	2	1	1	2	1	1	2
2	2	2	2	3	1	0	0	1	0	0	1	0	0	1	0	0	1	0	0	1	0	0	1	0	0	1	2	3	4	3	3	4	4	3	3	3	3	3	3	3	2	3	1
2	2	2	3	1	1	0	0	1	0	0	1	0	0	1	0	0	1	0	0	1	0	0	1	0	0	1	4	4	5	2	5	4	3	5	3	3	2	2	2	2	2	1	1
1	2	2	3	1	2	0	0	1	0	0	1	0	0	1	0	0	1	0	0	1	0	0	1	0	0	1	4	4	3	2	4	3	3	3	3	3	3	1	3	1	1	1	1
1	2	2	1	1	2	0	0	1	0	0	1	0	0	1	0	0	1	0	0	1	0	0	1	0	0	1	4	4	4	2	4	4	4	2	2	4	3	1	4	3	1	1	7	0	0	0	0	0	1
3	3	3	2		2	0	0	1	0	0	1	0	0	1	0	0	1	0	0	1	0	0	1	0	0	1	4	4	4	4	3	3	3	2	2	4	4	2	4	3	2	2	1
2	1	2	3	5	2	0	0	1	0	0	1	0	0	1	0	0	1	0	0	1	0	0	1	0	0	1	4	5	4	5	4	5	5	5	5	3	1	4	4	3	2	4	1
3	3	3	3		2	0	0	1	0	0	1	0	0	1	0	0	1	0	0	1	0	0	1	0	0	1	4	4	4	4	5	3	4	3	4	4	3	1	2	3	1	1	1
2	2	2	1		2	0	0	1	0	0	1	0	0	1	0	0	1	0	0	1	0	0	1	0	0	1	4	4	4	4	3	3	4	3	3	3	3	3	3	2	3	3	1
3	3	3	4	1	2	0	0	1	0	0	1	0	0	1	0	0	1	0	0	1	0	0	1	0	0	1	4	3	3	4	4	3	3	3	3	5	5	1	4	3	3	3	1
2	2	2	1	1	2	0	0	1	0	0	1	0	0	1	0	0	1	0	0	1	0	0	1	0	0	1	4	4	4	2	4	4	3	3	3	4	4	2	3	3	1	1	1
2	2	2	3	1	2	0	0	1	0	0	1	0	0	1	0	0	1	0	0	1	0	0	1	0	0	1	4	4	4	4	4	5	5	3	3	3	3	3	3	3	3	3	2
2	2	2	2	1	2	0	0	1	0	0	1	0	0	1	0	0	1	0	0	1	0	0	1	0	0	1	4	3	3	1	2	3	3	2	3	2	2	2	2	3	2	3	1
2	2	2	2	1	2	0	0	1	0	0	1	0	0	1	0	0	1	0	0	1	0	0	1	0	0	1	4	3	3	3	3	3	3	3	3	3	3	3	3	3	3	3	1
2	2	2	2	1	2	0	0	1	0	0	1	0	0	1	0	0	1	0	0	1	0	0	1	0	0	1	4	3	3	3	3	4	4	3	3	5	3	1	2	2	1	1	1
2	2	2	3	1	2	0	0	1	0	0	1	0	0	1	0	0	1	0	0	1	0	0	1	0	0	1	4	2	2	4	4	4	4	1	4	3	3	3	3	2	2	2	1
1	1	2	1	1	2	0	0	1	0	0	1	0	0	1	0	0	1	0	0	1	0	0	1	0	0	1	4	2	2	2	3	4	4	2	4	5	5	2	5	5	3	3	1
2	2	2	2	2	2	0	0	1	0	0	1	0	0	1	0	0	1	0	0	1	0	0	1	0	0	1	4	5	4	3	4	6	3	4	5	4	4	1	1	4	1	1	1
3	3	3	3		2	0	0	1	0	0	1	0	0	1	0	0	1	0	0	1	0	0	1	0	0	1	4	1	1	1	4	2	2	1	2	4	4	1	4	2	1	1	1
2	2	2	2	1	2	0	0	1	0	0	1	0	0	1	0	0	1	0	0	1	0	0	1	0	0	1	4	3	5	3	4	5	3	1	1	4	4	1	4	4	2	1	1
1	2	2	2	4	2	0	0	1	0	0	1	0	0	1	0	0	1	0	0	1	0	0	1	0	0	1	4	3	3	3	3	3	3	3	3	3	2	2	3	3	2	2	4
1	2	2	1	1	2	0	0	1	0	0	1	0	0	1	0	0	1	0	0	1	0	0	1	0	0	1	4	5	6	3	6	1	1	1	1	3	3	3	3	3	3	3	8	0	0	0	0	0	0
2	2	2	1	5	2	0	0	1	0	0	1	0	0	1	0	0	1	0	0	1	0	0	1	0	0	1	4	5	5	4	5	5	5	4	5	4	4	1	3	1	1	1	1
3	3	3	3		2	0	0	1	0	0	1	0	0	1	0	0	1	0	0	1	0	0	1	0	0	1	4	6	6	6	6	6	6	6	5	5	5	5	5	5	5	5	8	0	0	0	0	0	0
2	2	2	3	1	2	0	0	1	0	0	1	0	0	1	0	0	1	1	0	0	0	0	1	0	0	1	4	2	5	2	2	3	3	3	2	4	4	2	2	3	1	2	1
1	2	2	2	1	2	0	0	1	0	0	1	0	0	1	0	0	1	0	0	1	0	0	1	0	0	1	4	3	3	3	3	3	3	3	3	3	3	3	3	3	3	2	7	0	1	0	0	0	0
1	1	2	3	7	2	0	0	1	0	0	1	0	0	1	0	0	1	0	0	1	0	0	1	0	0	1	4	4	6	3	6	5	5	4	6	4	4	1	3	4	1	1	1
3	3	3	4		2	0	0	1	0	0	1	0	0	1	0	0	1	0	0	1	0	0	1	0	0	1	4	6	3	6	3	5	6	3	4	5	4	4	2	3	3	3	1
1	2	2	2	1	2	0	0	1	0	0	1	0	0	1	0	0	1	0	0	1	0	0	1	0	0	1	4	1	1	1	6	1	1	1	1	5	5	1	5	5	4	3	1
2	2	2	1	1	2	0	0	1	0	0	1	0	0	1	0	0	1	0	0	1	0	0	1	0	0	1	4	3	3	4	6	4	3	4	4	4	4	1	4	1	1	1	1
2	2	2	1	1	2	0	0	1	0	0	1	0	0	1	0	0	1	0	0	1	0	0	1	0	0	1	4	3	5	3	5	4	4	3	4	4	3	2	4	3	2	1	1
2	2	2	2	1	2	0	0	1	0	0	1	0	0	1	0	0	1	0	0	1	0	0	1	0	0	1	4	4	4	5	4	3	4	4	3	3	3	3	3	3	3	3	7	0	0	0	0	0	0
3	3	3	2	4	2	0	0	1	0	1	0	0	0	1	0	1	0	0	1	0	0	1	0	0	1	0	2	4	4	3	5	4	2	4	4	3	3	2	3	2	3	3	4
2	2	2	1	1	2	0	0	1	0	0	1	0	0	1	0	0	1	0	0	1	0	0	1	0	0	1	4	3	1	1	6	6	1	1	6	5	5	3	5	3	1	1	1
2	2	2	2	1	2	0	0	1	0	0	1	0	0	1	0	0	1	0	0	1	0	0	1	0	0	1	4	3	3	3	3	3	3	3	3	3	3	3	3	3	3	3	1
1	2	2	2	1	2	0	0	1	0	0	1	0	0	1	0	0	1	0	0	1	0	0	1	0	0	1	4	3	3	4	3	3	3	3	3	3	3	3	3	3	2	3	1
2	2	2	3	5	2	0	1	0	1	0	0	0	1	0	1	0	0	0	1	0	0	1	0	1	0	0	3	4	4	5	3	4	5	3	6	4	4	3	2	4	3	4	8	0	0	0	0	0	0
2	1	1	2		2	0	0	1	0	0	1	0	0	1	0	0	1	0	0	1	0	0	1	0	0	1	4	4	4	3	3	3	3	3	4	5	5	5	4	4	2	3	1
1	2	2	4	1	2	0	0	1	0	0	1	0	0	1	0	0	1	0	0	1	0	0	1	0	0	1	4	1	3	4	4	5	3	3	2	3	2	2	4	2	3	3	1
1	1	2	4	1	2	0	1	0	0	1	0	1	0	0	1	0	0	0	1	0	1	0	0	0	1	0	1	2	1	2	2	2	3	1	1	2	2	2	3	3	2	2	1
2	2	1	3	1	2	0	0	1	0	0	1	0	0	1	0	0	1	0	0	1	0	0	1	0	0	1	4	3	3	2	3	3	3	3	3	3	3	1	2	3	1	1	2
2	2	2	2	4	2	0	0	1	0	0	1	0	0	1	0	0	1	0	0	1	0	0	1	0	0	1	4	3	3	3	3	3	3	3	4	3	3	3	3	3	3	3	1
3	3	3	1		2	0	0	1	0	0	1	0	0	1	0	0	1	0	0	1	0	0	1	0	0	1	4	4	3	2	4	3	3	3	3	4	3	2	3	2	2	2	1
2	1	2	3	1	2	0	0	1	0	0	1	0	0	1	0	0	1	0	0	1	0	0	1	0	0	1	4	4	4	2	3	5	4	3	6	1	1	1	1	1	1	1	2
1	2	2	2	7	2	0	0	1	0	0	1	0	0	1	0	0	1	0	0	1	0	0	1	0	0	1	4	3	3	3	4	4	3	3	3	4	4	2	4	3	2	2	6
1	2	2	3	1	2	0	0	1	0	0	1	0	0	1	0	0	1	0	0	1	0	0	1	0	0	1	4	4	4	2	4	4	3	4	4	2	3	1	2	2	2	2	1
2	2	2	1	5	2	0	0	1	0	0	1	0	0	1	0	0	1	0	0	1	0	0	1	0	0	1	4	4	4	3	4	4	3	3	5	4	4	2	4	3	3	3	1
1	2	2	2	1	2	0	0	1	0	0	1	0	0	1	0	0	1	1	0	0	0	0	1	0	0	1	4	3	4	4	5	6	3	4	3	4	2	1	4	1	1	1	2
1	2	2	2	5	2	0	0	1	0	0	1	0	0	1	0	0	1	0	0	1	0	0	1	0	0	1	4	3	4	2	6	3	3	1	1	4	4	2	4	4	2	1	1
2	2	2	3	1	2	0	0	1	0	0	1	0	0	1	0	0	1	0	0	1	0	0	1	0	0	1	4	3	5	3	6	5	3	2	3	4	4	2	3	3	1	2	1
1	1	2	2	1	2	0	0	1	0	0	1	0	0	1	0	0	1	0	0	1	0	0	1	0	0	1	4	3	3	2	3	1	2	1	1	3	4	1	1	1	1	1	1
1	1	2	3	1	2	0	0	1	0	0	1	0	0	1	0	0	1	0	0	1	0	0	1	0	0	1	4	4	5	4	3	3	3	4	3	4	4	4	3	2	1	2	1
1	2	2	2		2	0	0	1	0	0	1	0	0	1	0	0	1	0	0	1	0	0	1	0	0	1	4	4	4	4	4	5	4	4	3	4	4	4	4	4	3	3	1
1	2	2	2	1	2	0	0	1	0	0	1	0	0	1	0	0	1	0	0	1	0	0	1	0	0	1	4	3	4	3	4	4	3	3	3	3	4	2	3	2	2	2	1
2	2	3	2	2	2	0	0	1	0	0	1	0	0	1	0	0	1	0	0	1	0	0	1	0	0	1	2	3	3	3	3	3	3	3	3	3	4	3	2	1	3	3	3
2	2	2	1	1	2	0	0	1	0	0	1	0	0	1	0	0	1	0	0	1	0	0	1	0	0	1	4	4	3	3	2	3	1	3	4	2	4	1	3	1	1	1	1
2	2	2	1	2	2	0	0	1	0	0	1	0	0	1	0	0	1	0	0	1	0	0	1	0	0	1	4	4	5	4	4	3	3	3	3	4	4	3	4	2	2	2	3
2	2	2	1	1	2	0	0	1	0	0	1	0	0	1	0	0	1	0	0	1	0	0	1	0	0	1	4	4	4	4	4	3	4	4	4	4	4	1	3	3	1	1	1
3	3	3	3		2	0	0	1	0	0	1	0	0	1	0	0	1	0	0	1	0	0	1	0	0	1	4	3	3	1	3	3	3	3	3	2	2	2	2	2	1	1	6
1	3	2	1	1	2	0	0	1	0	0	1	0	0	1	0	0	1	0	0	1	0	0	1	0	0	1	4	4	4	4	4	4	4	3	3	4	3	3	4	4	3	3	1
1	2	2	1	1	1	0	0	1	0	0	1	0	0	1	0	0	1	0	0	1	0	0	1	0	0	1	4	1	4	1	6	6	1	1	6	5	5	3	5	5	2	2	1
2	2	2	3	1	2	0	0	1	0	0	1	0	0	1	0	0	1	0	0	1	0	0	1	0	0	1	4	1	4	2	2	2	2	2	3	4	2	2	3	2	1	2	1
2	2	2	2	1	2	0	0	1	0	0	1	0	0	1	0	0	1	0	0	1	0	0	1	0	0	1	4	3	2	2	2	4	3	3	3	4	4	2	4	3	1	1	1
2	2	2	3	2	2	0	0	1	0	0	1	0	0	1	0	0	1	0	0	1	0	0	1	0	0	1	4	4	4	1	6	6	6	1	1	4	4	1	2	1	1	1	1
2	2	2	3	1	2	0	0	1	0	0	1	0	0	1	0	0	1	0	0	1	0	0	1	0	0	1	4	3	3	3	3	2	3	4	3	4	4	4	4	4	3	2	1
2	1	2	2	1	2	0	0	1	0	0	1	0	0	1	0	0	1	0	0	1	0	0	1	0	0	1	4	2	3	1	5	5	4	2	2	2	3	2	2	2	1	1	1
1	1	2	2	1	2	0	0	1	0	0	1	0	0	1	0	0	1	0	0	1	0	0	1	0	0	1	2	5	4	4	4	4	4	4	6	4	4	3	4	4	2	2	1
1	2	2	1	1	2	0	0	1	0	0	1	0	0	1	0	0	1	0	0	1	0	0	1	0	0	1	4	6	6	6	6	6	6	5	6	5	5	5	5	5	5	5	1
1	1	2	4	5	1	0	1	0	0	1	0	1	0	0	1	0	0	0	1	0	1	0	0	0	1	0	2	2	2	1	1	4	2	1	3	1	2	3	2	3	3	2	3
2	2	2	2	4	2	0	0	1	0	0	1	0	0	1	0	0	1	0	0	1	0	0	1	0	0	1	4	2	2	2	3	3	3	2	2	4	3	3	2	3	1	2	1
2	2	2	1	1	2	0	0	1	0	0	1	0	0	1	0	0	1	0	0	1	0	0	1	0	0	1	4	1	4	3	3	3	3	2	3	3	3	3	3	3	3	3	1
2	2	2	3	1	1	0	0	1	0	0	1	0	0	1	0	0	1	0	0	1	0	0	1	0	0	1	4	3	3	1	1	4	1	1	1	2	2	1	1	1	1	1	6
2	2	2	2	1	2	0	0	1	0	0	1	0	0	1	0	0	1	0	0	1	0	0	1	0	0	1	4	3	5	3	4	3	4	2	3	2	3	1	2	1	1	1	1
2	2	2	1	7	2	0	0	1	0	0	1	0	0	1	0	0	1	0	0	1	0	0	1	0	0	1	4	2	2	2	2	2	2	1	1	4	4	1	3	2	1	1	1
2	2	2	3	3	2	0	0	1	0	0	1	0	0	1	0	0	1	0	0	1	0	0	1	0	0	1	4	1	1	1	4	1	1	1	1	2	1	1	1	1	1	1	1
1	2	2	1	1	2	0	0	1	0	0	1	0	0	1	0	0	1	0	0	1	0	0	1	0	0	1	4	4	5	3	5	5	4	3	4	4	3	3	4	4	3	2	2
3	3	3	3		2	0	0	1	0	0	1	0	0	1	0	0	1	0	0	1	0	0	1	0	0	1	4	5	4	4	3	3	4	4	4	5	5	5	5	5	5	5	1
3	3	3	1		2	0	0	1	0	0	1	0	0	1	0	0	1	0	0	1	0	0	1	0	0	1	4	1	1	1	1	1	1	1	1	3	4	1	2	1	1	1	1
2	2	2	3	1	2	0	0	1	0	0	1	0	0	1	0	0	1	0	0	1	0	0	1	0	0	1	4	1	4	1	3	3	3	4	4	1	1	1	1	1	1	1	1
2	2	2	2	4	2	0	1	0	0	0	1	0	0	1	0	0	1	0	0	1	0	0	1	0	0	1	4	3	4	2	4	3	4	4	3	2	4	2	1	4	1	1	7	0	0	0	0	0	0
2	2	1	3	1	2	0	0	1	0	0	1	0	0	1	0	0	1	0	0	1	0	0	1	0	0	1	3	3	3	3	4	5	4	3	3	3	5	3	3	4	3	4	1
2	2	2	2	1	2	0	0	1	0	0	1	0	0	1	0	0	1	0	0	1	0	0	1	0	0	1	4	2	2	2	2	2	2	2	2	4	2	1	4	2	1	1	1
2	2	2	2		1	0	0	1	0	0	1	0	0	1	0	0	1	0	0	1	0	0	1	0	0	1	4	2	2	1	4	1	2	1	1	3	4	1	3	3	3	3	1
2	2	2	1	5	2	0	0	1	0	0	1	0	0	1	0	0	1	0	0	1	0	1	0	0	0	1	4	3	2	1	5	4	4	4	4	4	4	1	3	1	1	1	1
2	2	2	2	3	2	0	0	1	0	0	1	0	0	1	0	0	1	0	0	1	0	0	1	0	0	1	2	5	4	1	6	2	3	3	4	4	2	4	3	1	3	4	7	0	1	0	0	0	0
2	2	2	2	1	2	0	0	1	0	0	1	0	0	1	0	0	1	0	0	1	0	0	1	0	0	1	4	4	4	3	4	2	3	3	3	4	4	2	4	3	1	2	1
2	2	2	2	1	2	0	0	1	0	0	1	0	0	1	0	0	1	0	0	1	0	0	1	0	0	1	4	2	2	1	2	2	3	2	2	3	2	2	2	2	2	2	1
1	2	2	2	1	1	0	0	1	0	0	1	0	0	1	0	0	1	0	0	1	0	0	1	0	0	1	4	4	4	4	4	3	3	3	2	4	4	2	3	3	2	2	1
1	2	2	1		2	0	0	1	0	0	1	0	0	1	0	0	1	0	0	1	0	0	1	0	0	1	4	2	2	3	3	1	3	4	3	4	3	2	5	2	1	1	7	0	1	0	0	0	1
1	2	2	2	1	2	0	0	1	0	0	1	0	0	1	0	0	1	0	0	1	0	0	1	0	0	1	4	3	4	3	2	3	2	2	2	4	4	2	3	2	2	2	1
3	3	3	2		2	0	0	1	0	0	1	0	0	1	0	0	1	0	0	1	0	0	1	0	0	1	4	4	3	3	5	5	4	5	2	3	4	4	4	4	2	2	6
3	3	3	3	1	2	0	0	1	0	0	1	0	0	1	0	0	1	0	0	1	0	0	1	0	0	1	4	3	4	5	3	5	3	3	6	3	3	3	3	3	3	3	6
2	2	2	2	5	2	0	0	1	0	0	1	0	0	1	0	0	1	0	0	1	0	0	1	0	0	1	4	4	3	1	3	4	3	2	2	4	5	3	4	4	4	5	1
1	2	2	2		1	0	0	1	0	0	1	0	0	1	0	0	1	0	0	1	0	0	1	0	0	1	4	4	5	3	6	6	3	4	5	3	5	1	3	1	1	1	8	0	1	0	0	0	0
1	2	2	1	1	2	0	0	1	0	0	1	0	0	1	0	0	1	0	0	1	0	0	1	0	0	1	4	3	3	3	5	6	3	4	3	5	4	1	5	4	1	1	1
2	2	2	1	1	2	0	0	1	0	0	1	0	0	1	0	0	1	0	0	1	0	0	1	0	0	1	4	5	3	4	4	5	5	3	3	4	2	2	2	2	2	2	1
2	2	2	2	1	2	0	0	1	0	0	1	0	0	1	0	0	1	0	0	1	0	0	1	0	0	1	4	4	5	4	5	5	2	2	2	3	3	1	3	3	1	1	1
2	1	2	2	5	2	0	0	1	0	0	1	0	0	1	0	0	1	0	0	1	0	0	1	0	0	1	4	2	3	2	6	4	3	4	4	4	4	2	4	4	1	2	2
2	2	2	2	5	2	0	0	1	0	0	1	0	0	1	0	0	1	0	0	1	0	0	1	0	0	1	4	4	2	4	4	4	4	4	3	3	2	2	2	2	2	2	1
2	2	2	2	1	2	0	0	1	0	0	1	0	0	1	0	0	1	0	0	1	0	0	1	0	0	1	4	4	4	4	5	4	4	3	3	4	4	3	3	4	2	2	1
2	2	2	1	2	2	0	0	1	0	0	1	0	0	1	0	0	1	0	0	1	0	0	1	0	0	1	4	2	2	2	2	1	1	1	1	3	4	1	3	2	1	1	1
3	3	2	1	1	2	0	0	1	0	0	1	0	0	1	0	0	1	0	0	1	0	0	1	0	0	1	4	3	4	2	2	5	5	4	4	3	1	3	5	1	2	4	1
2	2	1	3	1	2	0	0	1	0	0	1	0	0	1	0	0	1	0	0	1	0	0	1	0	0	1	4	4	4	4	5	3	4	4	4	4	3	2	2	3	2	2	1
2	1	2	2	1	2	0	0	1	0	0	1	0	0	1	0	0	1	0	0	1	0	0	1	0	0	1	4	1	3	3	6	4	3	1	1	4	4	3	3	3	2	4	1
1	2	2	2	4	2	0	0	1	0	0	1	0	0	1	0	0	1	0	0	1	0	0	1	0	0	1	4	4	4	3	3	4	3	3	3	3	3	3	3	3	3	3	1
1	2	2	3	6	2	0	0	1	0	0	1	0	0	1	0	0	1	0	0	1	0	0	1	0	0	1	3	4	3	3	3	3	3	3	3	4	4	2	4	4	2	3	7	0	1	0	1	0	1
2	2	1	3	1	2	0	0	1	0	0	1	0	0	1	0	0	1	0	0	1	0	0	1	0	0	1	2	5	4	4	5	4	5	2	2	3	2	1	4	2	1	1	2
2	2	2	3	3	2	0	0	1	0	0	1	0	0	1	0	0	1	0	0	1	0	0	1	0	0	1	4	4	3	3	3	3	3	3	3	3	3	3	3	3	3	3	2
1	2	2	1	1	2	0	0	1	0	0	1	0	0	1	0	0	1	0	0	1	0	0	1	0	0	1	4	4	4	3	4	3	4	4	3	4	4	3	4	4	2	2	1
2	2	2	2	4	2	0	0	1	0	0	1	0	0	1	0	0	1	0	0	1	0	0	1	0	0	1	4	4	4	4	4	2	2	1	1	4	4	1	2	2	2	2	1
1	1	1	3		2	0	0	1	0	0	1	0	0	1	0	0	1	0	0	1	0	0	1	0	0	1	4	3	4	4	6	4	3	1	2	4	4	2	4	4	2	2	1
3	3	3	1		2	0	0	1	0	0	1	0	0	1	0	0	1	0	0	1	0	0	1	0	0	1	4	4	4	4	5	5	4	4	4	4	3	2	4	4	2	2	2
2	2	2	2	1	2	0	0	1	0	0	1	0	0	1	0	0	1	0	0	1	0	0	1	0	0	1	4	5	5	5	4	3	3	3	4	4	4	1	3	4	1	1	2
3	3	3	2		1	0	0	1	0	0	1	0	0	1	0	0	1	0	0	1	0	0	1	0	0	1	4	4	3	3	6	5	3	2	3	4	4	1	5	3	1	1	8	0	1	0	1	0	0
3	3	3	2		2	0	0	1	0	0	1	0	0	1	0	0	1	0	0	1	0	0	1	0	0	1	4	4	5	4	5	3	3	1	3	4	4	1	2	3	1	1	1
2	2	2	2	1	2	0	0	1	0	0	1	0	0	1	0	0	1	0	0	1	0	0	1	0	0	1	2	4	4	5	4	4	4	4	4	3	2	4	4	3	2	3	1
2	2	2	2	6	2	0	0	1	0	0	1	0	0	1	0	0	1	0	0	1	0	0	1	0	0	1	4	3	4	3	4	3	1	2	4	4	4	2	4	4	2	2	1
2	2	2	1	6	2	0	0	1	0	0	1	0	0	1	0	0	1	0	0	1	0	0	1	0	0	1	4	1	2	1	2	1	2	1	1	3	1	1	2	1	1	1	1
2	2	2	3		2	0	0	1	0	0	1	0	0	1	0	0	1	0	0	1	0	0	1	0	0	1	4	4	4	4	4	2	2	1	2	5	5	3	4	4	3	3	2
1	1	2	2	1	2	0	0	1	0	0	1	0	0	1	0	0	1	0	0	1	0	0	1	0	0	1	4	2	4	2	5	4	2	2	2	4	3	1	2	2	2	2	1
3	3	3	4	5	2	0	0	1	0	0	1	0	0	1	0	0	1	0	0	1	0	0	1	0	0	1	4	3	3	3	3	6	5	1	1	5	4	2	2	5	2	2	1
2	2	2	2	1	2	0	0	1	0	0	1	0	0	1	0	0	1	0	0	1	0	0	1	0	0	1	4	3	4	3	4	4	4	3	3	2	2	2	2	2	2	2	1
1	1	2	3	1	2	0	0	1	0	0	1	0	0	1	0	0	1	0	0	1	0	0	1	0	0	1	4	3	3	3	3	2	3	3	3	3	3	3	3	3	3	3	1
2	2	2	3	6	2	0	0	1	0	0	1	0	0	1	0	0	1	0	0	1	0	0	1	0	0	1	4	3	3	1	1	1	1	1	1	2	3	1	2	2	2	1	1
2	2	2	4	1	2	0	0	1	0	0	1	0	0	1	0	0	1	0	0	1	0	0	1	0	0	1	4	3	3	2	4	5	2	3	3	3	2	3	4	5	3	2	2
2	2	2	2	1	2	0	0	1	0	0	1	0	0	1	0	0	1	0	0	1	0	0	1	0	0	1	4	4	4	4	4	4	4	4	4	4	4	4	4	4	4	3	1
2	2	2	2	1	2	0	0	1	0	0	1	0	0	1	0	0	1	0	0	1	0	0	1	0	0	1	4	5	6	3	6	6	6	6	4	5	5	3	5	5	3	3	8	0	1	1	0	1	0
3	3	3	3		2	0	0	1	0	0	1	0	0	1	0	0	1	0	0	1	0	0	1	0	0	1	4	3	4	4	4	3	2	1	4	2	2	1	1	3	3	1	2
1	2	2	3	1	2	0	0	1	0	0	1	0	0	1	0	0	1	0	0	1	0	0	1	0	0	1	4	3	4	3	4	3	3	3	3	3	3	3	3	3	3	3	1
2	2	2	4	1	2	0	0	1	0	0	1	0	0	1	0	0	1	0	0	1	0	0	1	0	0	1	4	3	4	4	3	3	3	3	3	2	3	3	2	2	2	2	1
3	3	3	2	5	2	0	0	1	0	0	1	0	0	1	0	0	1	0	0	1	0	0	1	0	0	1	4	4	3	3	2	4	4	4	4	4	4	3	4	4	4	3	1
2	2	2	3	1	2	0	0	1	0	0	1	0	0	1	0	0	1	0	0	1	0	0	1	0	0	1	4	3	3	2	3	3	4	2	4	4	4	3	4	4	4	3	1
2	2	2	1	1	2	0	0	1	0	0	1	0	0	1	0	0	1	0	0	1	0	0	1	0	0	1	4	2	2	2	3	2	2	2	3	2	1	1	2	1	1	1	1
2	2	2	1	1	2	0	0	1	0	0	1	0	0	1	0	0	1	0	0	1	0	0	1	0	0	1	4	4	4	2	4	6	4	3	4	3	1	1	2	1	1	1	1
2	2	2	1	5	2	0	0	1	0	0	1	0	0	1	0	0	1	0	0	1	0	0	1	0	0	1	4	4	4	4	4	4	4	4	4	3	3	3	3	3	3	3	1
2	2	2	1	1	2	0	0	1	0	0	1	0	0	1	0	0	1	0	0	1	0	0	1	0	0	1	4	3	3	6	4	6	5	4	5	3	4	1	3	3	1	1	8	0	0	0	0	0	1
1	2	2	1	7	2	0	0	1	0	0	1	0	0	1	0	0	1	0	0	1	0	0	1	0	0	1	4	5	5	1	6	6	4	1	2	4	3	1	1	4	1	1	1
2	2	2	2	1	2	0	0	1	0	0	1	0	0	1	0	0	1	0	0	1	0	0	1	0	0	1	4	2	4	2	3	4	2	3	3	4	4	1	2	2	1	1	1
2	2	2	3	7	1	0	0	1	0	0	1	0	0	1	0	0	1	0	0	1	0	0	1	0	0	1	4	1	2	1	1	1	1	1	1	4	4	2	4	3	1	2	2
2	3	3	2	1	2	0	0	1	0	0	1	0	0	1	0	0	1	0	0	1	0	0	1	0	0	1	4	4	3	2	4	6	3	6	6	2	5	1	1	2	1	1	8	0	1	1	0	0	1
2	3	1	1	3	2	0	0	1	0	0	1	0	0	1	0	0	1	0	0	1	0	0	1	0	0	1	4	4	5	3	3	3	3	3	6	4	4	2	4	4	1	1	1
2	2	2	2	1	2	0	0	1	0	0	1	0	0	1	0	0	1	0	0	1	0	0	1	0	0	1	4	1	1	1	6	6	1	1	1	5	1	1	5	1	1	1	3
2	2	2	2	1	2	0	0	1	0	0	1	0	0	1	0	0	1	0	0	1	0	0	1	0	0	1	4	4	3	3	3	2	4	3	2	2	3	3	3	3	3	4	6
3	3	3	3		2	0	0	1	0	0	1	0	0	1	0	0	1	0	0	1	0	0	1	0	0	1	4	2	3	3	4	4	3	3	3	5	4	2	4	3	3	2	2
2	2	1	1	1	2	0	0	1	0	0	1	0	0	1	0	0	1	0	0	1	0	0	1	0	0	1	4	3	3	3	3	3	3	3	3	3	3	3	3	3	3	3	1
2	2	2	3	7	2	0	0	1	0	0	1	0	0	1	0	0	1	0	0	1	0	0	1	0	0	1	4	2	5	3	4	4	3	3	3	2	2	1	1	2	2	1	1
2	2	2	2	1	2	0	0	1	0	0	1	0	0	1	0	0	1	0	0	1	0	0	1	0	0	1	4	1	2	1	3	3	2	3	2	2	2	1	3	2	2	1	1
2	2	2	2	1	2	0	0	1	0	0	1	0	0	1	0	0	1	0	0	1	0	0	1	0	0	1	4	3	3	3	4	4	3	3	3	4	4	2	4	4	2	2	1
2	2	2	3	3	2	0	0	1	0	0	1	0	0	1	0	0	1	0	0	1	0	0	1	0	0	1	4	4	4	4	4	4	4	4	4	4	4	2	3	4	1	1	1
1	2	2	1	1	2	0	0	1	0	0	1	0	0	1	0	0	1	0	0	1	0	0	1	0	0	1	4	5	5	5	5	5	4	3	4	4	4	2	4	2	1	1	7	0	1	0	1	1	1
3	3	3	2		2	0	0	1	0	0	1	0	0	1	0	0	1	0	0	1	0	0	1	0	0	1	4	5	5	5	6	6	3	4	6	5	2	2	4	3	3	2	1
2	2	2	3	1	2	0	0	1	0	0	1	0	0	1	0	0	1	0	0	1	0	0	1	0	0	1	4	4	4	4	6	4	4	4	4	5	4	4	4	4	3	4	1
2	2	2	3	6	2	0	0	1	0	0	1	0	0	1	0	0	1	0	0	1	0	0	1	0	0	1	4	4	3	3	4	3	3	6	6	3	3	1	1	1	1	1	1
2	2	2	4	1	2	0	0	1	0	0	1	0	0	1	0	0	1	0	0	1	0	0	1	0	0	1	4	3	5	3	5	5	3	4	4	4	4	1	3	2	1	1	2
3	3	3	2	1	2	0	0	1	0	0	1	0	0	1	0	0	1	0	0	1	0	0	1	0	0	1	4	2	4	3	4	4	4	3	3	2	3	2	1	2	1	1	1
3	3	3	3		2	0	0	1	0	0	1	0	0	1	0	0	1	0	0	1	0	0	1	0	0	1	2	2	2	2	4	3	2	3	2	5	4	2	4	4	3	3	1
3	3	3	2	2	2	0	0	1	0	0	1	0	0	1	0	0	1	0	0	1	0	0	1	0	0	1	3	4	4	4	5	4	5	5	5	4	4	2	2	2	2	2	1
2	2	2	2	1	2	0	0	1	0	0	1	0	0	1	0	0	1	0	0	1	0	0	1	0	0	1	4	3	2	3	4	4	3	4	3	5	4	1	2	4	1	1	1
2	2	3	2	1	2	0	0	1	0	0	1	0	0	1	0	0	1	0	0	1	0	0	1	0	0	1	4	4	4	4	5	3	4	3	3	4	3	3	4	2	2	3	1
2	1	2	3	1	2	0	0	1	0	0	1	0	0	1	0	0	1	0	0	1	0	0	1	0	0	1	4	4	3	3	4	3	3	4	4	3	3	2	3	2	1	1	1
3	3	3	2		2	0	0	1	0	0	1	0	0	1	0	0	1	0	0	1	0	0	1	0	0	1	4	3	4	3	4	3	4	4	2	3	3	2	2	3	2	2	1
2	2	2	2	1	2	0	0	1	0	0	1	0	0	1	0	0	1	0	0	1	0	0	1	0	0	1	4	2	4	1	2	1	2	4	4	3	4	1	2	1	1	1	8	0	1	1	1	1	1
2	2	2	1	1	1	0	0	1	0	0	1	0	0	1	0	0	1	0	0	1	0	0	1	0	0	1	4	3	4	4	4	4	4	3	4	5	4	2	5	4	2	4	2
2	2	2	2	5	2	0	0	1	0	0	1	0	0	1	0	0	1	0	0	1	0	0	1	0	0	1	4	2	3	3	2	2	2	2	3	4	4	4	4	4	4	4	1
2	2	2	1	1	2	0	0	1	0	0	1	0	0	1	0	0	1	0	0	1	0	0	1	0	0	1	3	5	5	5	5	5	5	2	5	4	4	1	3	3	3	2	1
1	2	2	2	1	2	0	0	1	0	0	1	0	0	1	0	0	1	0	0	1	0	0	1	0	0	1	4	4	3	4	4	4	3	3	2	3	4	4	3	3	4	3	1
2	2	2	3		2	0	0	1	0	0	1	0	0	1	0	0	1	0	0	1	0	0	1	0	0	1	4	3	4	3	6	4	3	1	1	1	1	1	1	2	1	1	8	0	1	0	0	0	0
1	2	2	1	1	1	0	0	1	0	0	1	0	0	1	0	0	1	0	0	1	0	0	1	0	0	1	3	4	4	1	3	5	3	4	3	5	5	1	5	5	3	3	8	0	1	1	0	1	0
2	2	2	2	1	2	0	0	1	0	0	1	0	0	1	0	0	1	0	0	1	0	0	1	0	0	1	3	3	3	2	2	2	3	4	4	4	4	4	3	3	4	4	1
3	3	3	3		2	0	0	1	0	0	1	0	0	1	0	0	1	0	0	1	0	0	1	0	0	1	4	4	3	3	3	3	3	1	1	4	3	1	3	2	1	1	2
2	2	2	1	1	2	0	0	1	0	0	1	0	0	1	0	0	1	0	0	1	0	0	1	0	0	1	4	4	5	5	6	6	6	5	6	4	2	1	4	2	1	1	1
2	2	2	2	1	2	0	0	1	0	0	1	0	0	1	0	0	1	0	0	1	0	0	1	0	0	1	4	4	5	3	6	4	3	2	2	5	5	3	5	4	2	2	1
1	2	2	2	1	2	0	0	1	0	0	1	0	0	1	0	0	1	0	0	1	0	0	1	0	0	1	4	2	5	3	5	5	3	2	3	4	4	1	5	4	1	1	7	0	1	0	1	1	1
2	2	2	2	1	2	0	0	1	0	0	1	0	0	1	0	0	1	0	0	1	0	0	1	0	0	1	4	3	3	3	3	3	3	3	3	4	4	2	3	3	2	2	1
2	2	2	3	1	2	0	0	1	0	0	1	0	0	1	0	0	1	0	0	1	0	0	1	0	0	1	4	1	4	1	1	2	1	1	5	1	5	1	1	1	1	1	1
2	2	2	2	1	2	0	0	1	0	0	1	0	0	1	0	0	1	0	0	1	0	0	1	0	0	1	4	2	4	4	2	3	3	2	2	3	3	3	3	3	3	3	1
2	2	2	4	4	2	0	0	1	0	0	1	0	0	1	0	0	1	0	0	1	0	0	1	0	0	1	4	3	4	2	3	5	3	1	1	4	5	4	3	3	3	2	1
2	2	2	3	1	2	0	0	1	0	0	1	0	0	1	0	0	1	0	0	1	0	0	1	0	0	1	4	3	3	3	3	3	3	3	3	4	4	2	2	2	2	2	2
2	2	2	2	1	2	0	0	1	0	0	1	0	0	1	0	0	1	0	0	1	0	0	1	0	0	1	4	4	4	4	4	4	3	4	4	3	4	1	2	3	2	1	1
1	1	2	2	1	2	0	0	1	0	0	1	0	0	1	0	0	1	0	0	1	0	0	1	0	0	1	4	6	6	6	3	6	3	1	1	3	3	1	3	1	1	1	7	0	1	0	0	1	1
1	2	2	2	1	2	0	0	1	0	0	1	0	0	1	0	0	1	0	0	1	0	0	1	0	0	1	4	6	5	6	5	6	6	6	6	3	3	1	3	1	3	3	1
2	2	2	2	1	2	0	0	1	0	0	1	0	0	1	0	0	1	0	0	1	0	0	1	0	0	1	4	2	2	2	2	2	2	2	3	4	3	3	4	3	4	4	1
1	2	1	3		2	0	0	1	0	0	1	0	0	1	0	0	1	0	0	1	0	0	1	0	0	1	4	2	4	2	4	3	4	1	2	4	4	2	4	4	1	2	1
2	2	2	1	5	2	0	0	1	0	0	1	0	0	1	0	0	1	0	0	1	0	0	1	0	0	1	4	4	5	5	4	4	3	5	4	3	4	1	1	1	1	1	1
2	2	2	2	1	2	0	0	1	0	0	1	0	0	1	0	0	1	0	0	1	0	0	1	0	0	1	4	3	3	3	1	2	4	2	3	2	3	4	3	1	3	3	1
1	2	2	2	2	2	0	0	1	0	0	1	0	0	1	0	0	1	0	0	1	0	0	1	0	0	1	4	4	4	4	4	4	4	3	4	4	4	3	4	4	2	2	1
2	2	2	2	6	1	0	0	1	0	0	1	0	0	1	0	0	1	0	0	1	0	0	1	0	0	1	4	3	4	3	3	5	3	3	3	3	3	4	3	3	4	2	8	0	0	0	0	0	0
2	2	2	2	1	2	0	0	1	0	0	1	0	0	1	0	0	1	0	0	1	0	0	1	0	0	1	2	4	4	3	4	3	2	2	3	4	4	3	5	4	2	2	1
1	1	2	1	1	2	0	0	1	0	0	1	0	0	1	0	0	1	0	0	1	0	0	1	0	0	1	4	3	4	3	4	6	4	3	3	2	3	1	1	4	1	1	6
2	2	2	1	1	2	0	0	1	0	0	1	0	0	1	0	0	1	0	0	1	0	0	1	0	0	1	4	4	4	3	4	4	4	4	4	3	3	3	3	3	3	3	1
2	2	2	2	1	2	0	0	1	0	0	1	0	0	1	0	0	1	0	0	1	0	0	1	0	0	1	4	2	4	2	4	2	2	2	2	4	4	2	4	4	2	2	2
3	3	3	3		2	0	0	1	0	0	1	0	0	1	0	0	1	0	0	1	0	0	1	0	0	1	4	1	1	1	3	3	3	3	3	4	3	1	4	1	1	1	8	0	1	0	1	0	1
2	2	2	2	1	2	0	0	1	0	0	1	0	0	1	0	0	1	0	0	1	0	0	1	0	0	1	4	4	4	3	3	3	3	2	2	4	3	2	3	3	2	2	1
2	2	2	3	1	2	0	0	1	0	0	1	0	0	1	0	0	1	0	0	1	0	0	1	0	0	1	3	3	3	4	3	3	4	3	3	3	3	3	3	2	2	3	1
3	3	3	2		2	0	0	1	0	0	1	0	0	1	0	0	1	0	0	1	0	0	1	0	0	1	4	4	5	3	4	3	4	3	3	5	5	2	4	5	2	2	1
2	2	2	2	1	2	0	0	1	0	0	1	0	0	1	0	0	1	0	0	1	0	0	1	0	0	1	4	4	4	3	4	4	4	4	4	4	2	1	2	2	1	1	1
2	2	2	2	1	2	0	0	1	0	0	1	0	0	1	0	0	1	0	0	1	0	0	1	0	0	1	4	1	1	1	6	1	1	1	1	3	3	3	3	3	3	3	1
2	2	2	2	1	2	0	0	1	0	0	1	0	0	1	0	0	1	0	0	1	0	0	1	0	0	1	4	3	3	2	6	4	4	1	2	5	4	2	4	2	2	1	1
2	2	2	1	4	2	0	0	1	0	0	1	0	0	1	0	0	1	0	0	1	0	0	1	0	0	1	4	1	1	1	1	1	1	1	1	4	4	1	1	2	1	1	2
2	2	2	1	1	2	0	0	1	0	0	1	0	0	1	0	0	1	0	0	1	0	0	1	0	0	1	4	3	5	5	3	5	5	3	3	4	3	3	3	3	3	2	1
3	3	3	3		2	0	0	1	0	0	1	0	0	1	0	0	1	0	0	1	0	0	1	0	0	1	4	4	3	3	4	4	3	3	4	4	3	2	3	2	2	2	7	0	1	0	0	0	0
1	1	1	4		2	0	0	1	0	0	1	0	0	1	0	0	1	0	0	1	0	0	1	0	0	1	4	4	5	3	6	5	5	2	3	3	3	1	2	2	1	1	1
3	3	3	3		2	0	0	1	0	0	1	0	0	1	0	0	1	0	0	1	0	0	1	0	0	1	4	3	3	4	5	4	4	2	3	5	4	2	5	4	2	2	5
3	3	3	1		2	0	0	1	0	0	1	0	0	1	0	0	1	0	0	1	0	0	1	0	0	1	4	3	4	3	4	3	3	2	3	4	3	2	4	4	1	1	2
2	2	2	4	1	2	0	0	1	0	0	1	0	0	1	0	0	1	0	0	1	0	0	1	0	0	1	4	4	5	3	6	6	5	3	4	4	3	2	2	2	1	1	1
1	1	1	2	1	2	0	0	1	0	0	1	0	0	1	0	0	1	0	0	1	0	0	1	0	0	1	4	3	4	4	4	3	3	2	2	2	3	3	3	3	3	3	4
1	1	2	2		2	0	0	1	0	0	1	0	0	1	0	0	1	0	0	1	0	0	1	0	0	1	4	3	4	3	4	6	5	2	5	5	4	2	4	4	2	2	1
3	3	3	3		1	0	0	1	0	0	1	0	0	1	0	0	1	0	0	1	0	0	1	0	0	1	4	4	3	3	4	4	3	3	3	3	3	2	3	2	2	2	2
2	2	2	1	4	2	0	0	1	0	0	1	0	0	1	0	0	1	0	0	1	0	0	1	0	0	1	4	2	2	2	4	3	4	2	2	4	4	1	4	1	1	1	7	0	0	0	0	0	0
3	3	3	2		2	0	0	1	0	0	1	0	0	1	0	0	1	0	0	1	0	0	1	0	0	1	4	4	4	4	4	4	4	4	4	4	4	4	4	4	3	3	2
1	1	2	3	4	2	0	0	1	0	0	1	0	0	1	0	0	1	0	0	1	0	0	1	0	0	1	4	1	4	2	6	3	3	1	4	4	4	2	2	4	2	2	1
2	2	2	2	7	2	0	0	1	0	0	1	0	0	1	0	0	1	0	0	1	0	0	1	0	0	1	4	1	1	1	1	3	1	1	2	4	2	1	4	2	1	1	6
2	2	2	2	1	2	0	0	1	0	0	1	0	0	1	0	0	1	0	0	1	0	0	1	0	0	1	4	3	4	4	5	6	4	3	3	2	3	1	1	1	1	1	8	1	0	0	0	0	0
3	3	3	2		2	0	0	1	0	0	1	0	0	1	0	0	1	0	0	1	0	0	1	0	1	0	4	2	5	1	6	6	3	4	3	5	4	1	4	2	1	1	1
1	2	2	2	1	2	0	0	1	0	0	1	0	0	1	0	0	1	0	0	1	0	0	1	0	0	1	4	3	3	3	3	3	3	3	2	5	4	4	4	3	3	3	1
1	2	2	1	1	2	0	0	1	0	0	1	0	0	1	0	0	1	0	0	1	0	0	1	0	0	1	4	3	4	4	4	2	1	2	5	1	5	1	1	1	1	1	8	0	0	1	0	0	0
2	2	2	3	1	2	0	0	1	0	0	1	0	0	1	0	0	1	0	0	1	0	0	1	0	0	1	4	3	4	3	3	5	3	3	3	4	3	3	3	3	3	3	1
2	2	2	2	1	2	0	0	1	0	0	1	0	0	1	0	0	1	0	0	1	0	0	1	0	0	1	4	4	4	4	4	4	3	2	3	3	3	3	3	3	3	3	1
2	2	2	3	1	2	0	0	1	0	0	1	0	0	1	0	0	1	0	0	1	0	0	1	0	0	1	4	4	5	4	5	6	5	5	5	4	4	2	4	4	3	3	1
1	2	2	3	1	2	0	0	1	0	0	1	0	0	1	0	0	1	0	0	1	0	0	1	0	0	1	4	2	2	2	2	3	2	2	2	1	1	1	1	1	1	1	8	0	0	1	0	0	0
2	2	2	3	7	2	0	0	1	0	0	1	0	0	1	0	0	1	0	0	1	0	0	1	0	0	1	4	3	3	3	3	2	3	3	3	3	4	2	2	2	2	2	1
3	3	3	3		2	0	0	1	0	0	1	0	0	1	0	0	1	1	0	0	0	0	1	0	0	1	2	2	5	5	5	5	6	4	5	4	4	1	2	2	1	1	1
2	2	2	1	5	2	0	0	1	0	0	1	0	0	1	0	0	1	0	0	1	0	0	1	0	0	1	4	3	4	2	4	1	1	2	3	4	4	3	4	4	2	2	2
2	2	2	1	1	2	0	0	1	0	0	1	0	0	1	0	0	1	0	0	1	0	0	1	0	0	1	4	1	1	1	3	4	3	2	3	4	2	1	4	1	1	1	1
3	3	3	1	1	2	1	0	0	0	0	1	1	0	0	0	0	1	1	0	0	0	0	1	0	0	1	4	4	4	4	4	5	4	2	2	4	4	2	4	4	2	2	1
3	3	3	1		2	0	0	1	0	0	1	0	0	1	0	0	1	0	0	1	0	0	1	0	0	1	4	5	5	4	4	6	3	5	5	5	5	3	5	2	1	2	7	0	1	1	0	1	1
2	2	2	3	7	2	0	0	1	0	0	1	0	0	1	0	0	1	0	0	1	0	0	1	0	0	1	4	4	4	4	3	3	3	3	4	3	3	3	3	3	3	3	8	0	0	0	0	0	0
1	2	2	2	1	1	0	0	1	0	0	1	0	0	1	0	0	1	0	0	1	0	0	1	0	0	1	4	3	4	3	4	5	4	3	3	2	2	2	2	2	2	2	1
1	1	2	1	1	2	0	0	1	0	0	1	0	0	1	0	0	1	0	0	1	0	0	1	0	0	1	4	3	4	4	6	4	3	4	3	5	5	1	3	3	1	1	1
1	2	2	1	7	2	0	0	1	0	0	1	0	0	1	0	0	1	0	0	1	0	0	1	0	0	1	4	1	1	1	1	1	3	1	1	3	4	1	4	1	1	1	1
1	2	2	1	3	2	0	0	1	0	0	1	0	0	1	0	0	1	0	0	1	0	0	1	0	0	1	4	5	6	4	6	6	6	4	4	3	4	3	3	3	3	3	1
2	2	2	3	7	2	0	0	1	0	0	1	0	0	1	0	0	1	0	0	1	0	0	1	0	0	1	4	1	1	1	1	1	1	1	1	1	1	1	1	1	1	1	1
1	2	2	1	1	2	0	0	1	0	0	1	0	0	1	0	0	1	0	0	1	0	0	1	0	0	1	4	1	4	1	5	6	2	4	5	4	1	1	4	1	1	1	1
1	2	2	2	1	2	0	0	1	0	0	1	0	0	1	0	0	1	0	0	1	0	0	1	0	0	1	4	5	5	4	5	5	3	3	4	4	3	3	4	4	3	3	1
2	2	2	3	1	2	0	0	1	0	0	1	0	0	1	0	0	1	0	0	1	0	0	1	0	0	1	4	3	3	3	3	3	3	3	3	5	4	2	4	3	2	1	1
1	2	2	3	1	2	0	0	1	0	0	1	0	0	1	0	0	1	0	0	1	0	0	1	0	0	1	4	2	4	2	5	4	3	3	4	4	4	1	3	2	1	1	1
2	2	2	2	3	2	0	0	1	0	0	1	0	0	1	0	0	1	0	0	1	0	0	1	0	0	1	4	1	1	1	1	1	1	1	2	4	4	2	2	2	2	2	1
2	2	2	2	1	2	0	0	1	0	0	1	0	0	1	0	0	1	0	0	1	0	0	1	0	0	1	4	4	4	4	4	4	3	3	4	4	4	3	4	3	2	2	1
1	2	2	1	2	2	0	0	1	0	0	1	0	0	1	0	0	1	0	0	1	0	0	1	0	0	1	4	1	1	4	6	4	3	3	3	3	3	3	3	3	3	3	1
2	2	2	1	1	2	0	0	1	0	0	1	0	0	1	0	0	1	0	0	1	0	0	1	0	0	1	4	3	3	2	3	2	3	2	2	5	3	1	4	3	1	1	2
2	2	2	1	1	2	0	0	1	0	0	1	0	0	1	0	0	1	0	0	1	0	0	1	0	0	1	3	1	1	1	1	1	1	1	1	1	1	1	1	1	2	1	1
3	3	3	2		2	0	0	1	0	0	1	0	0	1	0	0	1	0	0	1	0	0	1	0	0	1	4	4	4	2	6	4	2	2	2	4	4	2	3	3	1	2	1
1	2	2	1	1	2	0	0	1	0	0	1	0	0	1	0	0	1	0	0	1	0	0	1	0	0	1	4	4	4	3	5	6	3	3	3	4	4	2	4	3	3	3	1
2	2	2	1	1	2	0	0	1	0	0	1	0	0	1	0	0	1	0	0	1	0	0	1	0	0	1	4	2	2	2	2	2	2	1	1	3	3	2	2	2	3	2	1
3	3	3	3		2	0	0	1	0	0	1	0	0	1	0	0	1	0	0	1	0	0	1	0	0	1	4	3	3	3	4	3	3	3	3	5	4	2	3	4	2	2	1
2	2	2	1	1	2	0	0	1	0	0	1	0	0	1	0	0	1	0	0	1	0	0	1	0	0	1	4	3	3	3	3	4	2	1	1	4	3	2	2	1	1	1	2
2	3	3	2	1	2	0	0	1	0	0	1	0	0	1	0	0	1	0	0	1	0	0	1	0	0	1	4	3	4	3	3	3	3	3	3	4	3	3	3	3	3	3	1
1	2	2	2	1	2	0	0	1	0	0	1	0	0	1	0	0	1	0	0	1	0	0	1	0	0	1	4	3	3	3	3	3	3	3	3	5	5	5	5	5	5	5	1
1	2	2	2	1	2	0	0	1	0	0	1	0	0	1	0	0	1	0	0	1	0	0	1	0	0	1	4	1	4	4	4	4	3	3	3	4	2	1	2	2	1	1	1
3	3	3	3		2	0	0	1	0	0	1	0	0	1	0	0	1	0	0	1	0	0	1	0	0	1	4	1	3	2	6	2	3	1	1	5	3	2	4	3	2	2	2
3	3	3	1		2	0	0	1	0	0	1	0	0	1	0	0	1	0	0	1	0	0	1	0	0	1	4	3	2	2	2	4	4	3	3	2	3	2	2	2	2	2	8	0	0	0	0	0	1
1	1	2	2	1	1	0	0	1	0	0	1	0	0	1	0	0	1	0	0	1	0	0	1	0	0	1	4	5	4	4	5	4	3	4	4	4	4	2	4	4	1	2	7	0	0	0	0	1	0
2	2	2	2	4	2	0	0	1	0	0	1	0	0	1	0	0	1	0	0	1	0	0	1	0	0	1	4	3	3	1	3	4	4	1	1	3	3	1	2	2	1	1	1
1	2	2	1	4	2	0	1	0	0	1	0	0	1	0	1	0	0	1	0	0	0	1	0	0	1	0	2	2	3	1	3	4	2	2	4	3	2	2	3	2	2	2	1
3	3	3	2		2	0	0	1	0	0	1	0	0	1	0	0	1	0	0	1	0	0	1	0	0	1	4	2	4	3	4	4	4	3	4	4	3	1	2	1	1	1	1
2	2	2	3	5	2	0	0	1	0	0	1	0	0	1	0	0	1	0	0	1	0	0	1	0	0	1	4	3	3	1	1	6	4	4	4	5	5	1	4	1	1	1	1
2	2	2	2	1	2	0	0	1	0	0	1	0	0	1	0	0	1	0	0	1	0	0	1	0	0	1	4	3	4	2	6	6	6	3	3	4	4	1	4	3	1	1	1
2	2	2	3	1	2	0	0	1	0	0	1	0	0	1	0	0	1	0	0	1	0	0	1	0	0	1	4	4	4	4	4	4	4	4	4	3	3	3	3	3	3	3	2
3	1	2	1	1	2	0	0	1	0	0	1	0	0	1	0	0	1	0	0	1	0	0	1	0	0	1	3	4	5	2	6	5	4	3	1	5	5	1	2	4	1	1	1
3	3	3	2		2	0	0	1	0	0	1	0	0	1	0	0	1	0	0	1	0	0	1	0	0	1	4	3	4	3	3	3	3	3	3	3	4	3	3	3	3	3	1
2	1	2	1	1	2	0	0	1	0	0	1	0	0	1	0	0	1	0	0	1	0	0	1	0	0	1	4	4	4	3	4	5	4	4	4	4	4	2	2	4	2	2	6
2	2	2	1	1	2	0	0	1	0	0	1	0	0	1	0	0	1	0	0	1	0	0	1	0	0	1	4	3	5	4	4	5	4	4	4	5	3	2	3	2	3	3	1
2	2	2	2	1	2	0	0	1	0	0	1	0	0	1	0	0	1	0	0	1	0	0	1	0	0	1	4	3	3	4	4	4	3	3	3	3	3	1	1	3	1	1	2
2	2	2	2	1	2	0	0	1	0	0	1	0	0	1	0	0	1	0	0	1	0	0	1	0	0	1	4	3	3	3	3	3	3	3	3	4	3	3	3	3	3	3	1
2	2	2	3	1	2	0	0	1	0	0	1	0	0	1	0	0	1	0	0	1	0	0	1	0	0	1	3	4	3	4	4	4	4	4	4	3	3	3	3	3	3	3	8	1	0	0	0	0	0
2	2	2	2	4	2	0	0	1	0	0	1	0	0	1	0	0	1	0	0	1	0	0	1	0	0	1	4	3	3	3	4	4	4	3	3	3	3	2	3	2	1	1	1
2	2	2	3	1	1	0	0	1	0	0	1	0	0	1	0	0	1	0	0	1	0	0	1	0	0	1	4	4	3	4	4	4	4	3	4	4	4	3	4	4	3	3	1
1	2	2	1	1	2	0	0	1	0	0	1	0	0	1	0	0	1	0	0	1	0	0	1	0	0	1	4	2	5	1	5	4	3	1	4	1	5	1	1	1	1	1	8	0	1	1	1	1	1
2	2	2	4	1	2	0	0	1	0	0	1	0	0	1	0	0	1	0	0	1	0	0	1	0	0	1	4	3	4	1	6	6	3	2	3	4	5	2	2	4	1	1	1
3	3	3	1	2	2	0	0	1	0	0	1	0	0	1	0	0	1	0	0	1	0	0	1	0	0	1	4	3	4	3	5	3	4	3	3	4	4	1	2	3	1	1	1
1	2	2	2	1	2	0	0	1	0	0	1	0	0	1	0	0	1	0	0	1	0	0	1	0	0	1	4	1	2	3	3	2	1	1	3	3	3	3	3	3	3	3	2
2	2	2	3	2	2	0	0	1	0	0	1	0	0	1	0	0	1	0	0	1	0	0	1	0	0	1	4	4	2	3	3	3	3	5	4	3	3	4	3	3	3	3	1
2	2	2	3	3	2	0	0	1	0	0	1	0	0	1	0	0	1	0	0	1	0	0	1	0	0	1	4	3	3	3	3	5	3	4	4	3	3	2	3	3	3	3	2
2	2	2	1	1	2	0	0	1	0	0	1	0	0	1	0	0	1	0	0	1	0	0	1	0	0	1	4	3	4	3	4	6	3	6	6	5	5	1	5	5	3	3	1
2	1	2	3	1	2	0	0	1	0	0	1	0	0	1	0	0	1	0	0	1	0	0	1	0	0	1	4	4	4	3	4	4	3	4	4	4	3	1	4	3	1	1	1
1	2	2	2	1	1	0	0	1	0	0	1	0	0	1	0	0	1	0	0	1	0	0	1	0	0	1	4	4	3	3	4	5	4	3	4	4	4	2	4	2	2	2	1
1	1	1	1	1	2	0	0	1	0	0	1	0	0	1	0	0	1	0	0	1	0	0	1	0	0	1	3	1	1	1	6	5	6	1	1	5	5	1	1	4	1	1	6
2	2	2	2	5	2	0	0	1	0	0	1	0	0	1	0	0	1	0	0	1	0	0	1	0	0	1	4	2	4	3	3	5	5	2	4	3	3	3	3	3	2	2	1
2	2	2	2	1	2	0	0	1	0	0	1	0	0	1	0	0	1	0	0	1	0	0	1	0	0	1	4	2	2	2	4	4	3	2	4	3	3	3	3	3	3	3	1
1	2	2	3	1	2	0	0	1	0	0	1	0	0	1	0	0	1	0	0	1	0	0	1	0	0	1	4	4	4	3	4	3	4	4	4	3	4	1	4	2	1	1	1
2	2	2	3	3	2	0	0	1	0	0	1	0	0	1	0	0	1	0	0	1	0	0	1	0	0	1	4	4	4	3	2	4	2	2	3	4	4	3	4	3	2	2	1
1	1	1	1	1	2	0	0	1	0	0	1	0	0	1	0	0	1	0	0	1	0	0	1	0	0	1	4	3	3	1	5	4	4	1	3	4	3	1	2	2	2	2	1
2	2	2	3	1	2	0	0	1	0	0	1	0	0	1	0	0	1	0	0	1	0	0	1	0	0	1	4	4	4	4	4	4	4	4	4	3	3	3	3	3	3	3	1
2	2	2	1	4	2	0	0	1	0	0	1	0	0	1	0	0	1	0	0	1	0	0	1	0	0	1	4	4	5	4	6	1	3	2	4	4	4	1	4	1	2	1	1
2	2	2	3	5	2	0	0	1	0	0	1	0	0	1	0	0	1	0	0	1	0	0	1	0	0	1	4	4	4	3	4	4	3	3	3	4	3	1	3	3	1	1	1
2	2	2	1	1	2	0	0	1	0	0	1	0	0	1	0	0	1	0	0	1	0	0	1	0	0	1	4	2	2	2	2	4	2	2	2	3	3	2	1	1	1	1	1
2	2	2	4	1	1	0	0	1	0	0	1	0	0	1	0	0	1	0	0	1	0	0	1	0	0	1	4	3	3	3	4	4	3	3	3	5	5	1	3	5	1	1	1
2	2	2	2	7	2	0	0	1	0	0	1	0	0	1	0	0	1	0	0	1	0	0	1	0	0	1	4	3	3	3	3	3	2	3	3	3	3	3	3	3	3	3	1
2	2	2	3	1	2	0	0	1	0	0	1	0	0	1	0	0	1	0	0	1	0	0	1	0	0	1	4	1	4	1	2	4	4	1	1	4	3	1	4	1	1	1	1
2	2	1	3	1	2	0	0	1	0	0	1	0	0	1	0	0	1	0	0	1	0	0	1	0	0	1	4	3	4	4	5	5	4	2	2	2	2	1	1	1	1	1	7	0	1	1	1	1	1
2	2	2	1	1	2	0	0	1	0	0	1	0	0	1	0	0	1	0	0	1	0	0	1	0	0	1	4	4	4	4	5	4	3	3	2	2	3	1	2	2	1	1	1
3	2	2	3	4	2	0	0	1	0	0	1	0	0	1	0	0	1	0	0	1	0	0	1	0	0	1	4	3	3	5	5	3	3	4	3	4	4	1	3	3	2	1	2
1	1	2	2	1	2	1	0	0	0	0	1	1	0	0	0	0	1	1	0	0	0	0	1	0	0	1	2	3	2	3	4	4	3	3	3	4	2	2	4	4	2	2	4
1	1	3	1	1	2	0	0	1	0	0	1	0	0	1	0	0	1	0	0	1	0	0	1	0	0	1	3	6	3	3	6	6	6	6	6	5	3	1	5	4	1	1	1
1	2	2	1	1	2	0	0	1	0	0	1	0	0	1	0	0	1	0	0	1	0	0	1	0	0	1	4	1	5	2	3	6	1	4	1	1	1	1	1	1	1	1	8	0	0	1	0	0	0
2	2	2	2	1	2	0	0	1	0	0	1	0	0	1	0	0	1	0	0	1	0	0	1	0	0	1	4	3	3	3	3	3	3	3	3	4	2	2	2	2	2	2	1
1	2	2	1	1	2	0	0	1	0	0	1	0	0	1	0	0	1	0	0	1	0	0	1	0	0	1	4	4	3	3	4	4	4	4	4	3	4	1	4	1	1	1	2
3	3	3	1		2	0	0	1	0	0	1	0	0	1	0	0	1	0	0	1	0	0	1	0	0	1	4	4	5	4	5	5	4	5	6	3	1	1	2	2	1	1	1
2	2	2	2	1	2	0	0	1	0	0	1	0	0	1	0	0	1	0	0	1	0	0	1	0	0	1	4	3	4	3	3	3	3	4	3	3	3	3	3	3	3	3	1
2	2	2	1	1	2	0	0	1	0	0	1	0	0	1	0	0	1	0	0	1	0	0	1	0	0	1	4	4	4	2	4	4	3	3	3	5	5	2	5	3	3	2	1
2	2	2	2	1	2	0	0	1	0	0	1	0	0	1	0	0	1	0	0	1	0	0	1	0	0	1	4	2	4	2	3	5	3	3	3	3	3	1	2	2	2	2	1
2	3	3	3		2	0	0	1	0	0	1	0	0	1	0	0	1	0	0	1	0	0	1	0	0	1	4	3	5	4	6	6	4	4	4	4	5	1	3	1	1	1	6
1	2	2	3		2	0	0	1	0	0	1	0	0	1	0	0	1	0	0	1	0	0	1	0	0	1	4	3	3	3	5	4	3	3	3	4	4	3	4	2	2	2	1
2	2	2	4	5	2	0	0	1	0	0	1	0	0	1	0	0	1	0	0	1	0	0	1	0	0	1	4	3	5	3	5	4	6	3	5	5	3	5	4	4	4	5	8	0	0	0	0	0	0
2	2	2	3	1	2	0	0	1	0	0	1	0	0	1	0	0	1	0	0	1	0	0	1	0	0	1	4	3	4	2	4	4	4	4	4	4	4	2	2	2	2	2	1
1	1	2	1	4	2	0	0	1	0	0	1	0	0	1	0	0	1	0	0	1	0	0	1	0	0	1	4	3	5	1	6	6	3	1	1	1	1	1	1	1	1	1	8	0	1	0	0	1	1
1	1	3	3	1	2	0	0	1	0	0	1	0	0	1	0	0	1	1	0	0	0	0	1	0	0	1	4	3	4	3	3	3	3	1	3	3	3	1	3	3	1	1	1
2	2	2	4	1	2	0	0	1	0	0	1	0	0	1	0	0	1	0	0	1	0	0	1	0	0	1	4	2	3	3	6	6	6	2	3	5	5	2	4	4	3	3	1
2	2	2	3	1	2	0	0	1	0	0	1	0	0	1	0	0	1	0	0	1	0	0	1	0	0	1	4	3	3	3	4	4	3	3	3	3	3	3	3	3	3	2	2
2	2	1	3	1	2	0	0	1	0	0	1	0	0	1	0	0	1	0	0	1	0	0	1	0	0	1	4	3	2	2	4	2	3	2	2	4	4	1	3	4	2	1	1
1	1	2	1	1	2	0	0	1	0	0	1	0	0	1	0	0	1	0	0	1	0	0	1	0	0	1	4	4	4	4	4	5	4	3	3	4	4	3	4	3	3	3	1
1	1	1	3	5	1	0	0	1	0	0	1	0	0	1	0	0	1	0	0	1	0	0	1	0	0	1	2	5	5	2	5	2	2	5	5	4	2	1	4	2	1	1	1
2	2	2	1	6	2	0	0	1	0	0	1	0	0	1	0	0	1	0	0	1	0	0	1	0	0	1	4	3	4	4	4	2	2	2	6	4	5	2	4	4	2	2	1
2	2	2	1	5	2	0	0	1	0	0	1	0	0	1	0	0	1	0	0	1	0	0	1	0	0	1	4	3	4	3	6	1	3	2	2	2	2	1	1	1	1	1	2
2	2	2	2	6	2	0	0	1	0	0	1	0	0	1	0	0	1	0	0	1	0	0	1	0	0	1	4	3	4	4	4	4	2	3	3	4	4	2	4	4	2	2	1
2	2	2	2	1	2	0	0	1	0	0	1	0	0	1	0	0	1	0	0	1	0	0	1	0	0	1	4	2	4	3	3	4	4	2	4	4	3	1	4	3	2	2	1
2	2	2	2	1	2	0	0	1	0	0	1	0	0	1	0	0	1	0	0	1	0	0	1	0	0	1	4	3	2	4	1	4	2	3	2	5	1	1	1	1	1	1	1
2	2	2	1	3	2	0	0	1	0	0	1	0	0	1	0	0	1	0	0	1	0	0	1	0	0	1	4	5	5	4	6	6	5	2	2	4	5	1	1	1	1	1	1
2	2	2	1	1	2	0	0	1	0	0	1	0	0	1	0	0	1	0	0	1	0	0	1	0	0	1	4	3	5	1	3	2	1	4	6	3	5	1	2	1	1	1	1
2	2	2	1	7	2	0	0	1	0	0	1	0	0	1	0	0	1	0	0	1	0	0	1	0	0	1	4	4	4	4	4	4	4	4	4	5	5	5	5	5	2	2	1
2	2	2	1	1	2	0	0	1	0	0	1	0	0	1	0	0	1	0	0	1	0	0	1	0	0	1	4	3	4	4	5	5	5	4	5	4	4	2	3	3	2	2	1
1	2	3	3	1	1	0	0	1	0	0	1	0	0	1	0	0	1	0	0	1	0	0	1	0	0	1	4	4	4	3	4	5	6	1	4	5	5	1	5	5	1	1	1
1	2	2	3	1	2	0	0	1	0	0	1	0	0	1	0	0	1	0	0	1	0	0	1	0	0	1	2	2	2	1	4	4	1	1	1	5	4	1	5	5	2	2	1
2	2	2	2	1	2	0	0	1	0	0	1	0	0	1	0	0	1	0	0	1	0	0	1	0	0	1	4	4	4	3	4	4	4	3	3	5	2	2	5	2	1	2	1
2	2	2	1	3	2	0	0	1	0	0	1	0	0	1	0	0	1	0	0	1	0	0	1	0	0	1	4	3	3	3	2	3	3	3	2	3	3	3	3	3	3	3	1
2	2	2	1	5	2	0	0	1	0	0	1	0	0	1	0	0	1	0	0	1	0	0	1	0	0	1	4	1	3	3	4	3	3	4	5	4	4	2	2	1	1	1	1
1	1	3	2	1	2	0	0	1	0	0	1	0	0	1	0	0	1	0	0	1	0	0	1	0	0	1	4	5	5	4	3	5	4	2	2	5	4	2	4	3	2	2	2
2	2	1	2	1	2	0	0	1	0	0	1	0	0	1	0	0	1	0	0	1	0	0	1	0	0	1	4	3	4	4	4	6	3	3	4	4	4	2	4	4	2	2	1
1	2	2	1	1	2	0	0	1	0	0	1	0	0	1	0	0	1	0	0	1	0	0	1	0	0	1	4	4	4	3	3	6	3	3	3	3	2	1	2	2	1	1	2
1	2	2	3	7	2	0	0	1	0	0	1	0	0	1	0	0	1	0	0	1	0	0	1	0	0	1	4	1	1	1	4	1	1	1	2	3	3	2	3	3	2	2	1
2	2	2	2	6	2	0	0	1	0	0	1	0	0	1	0	0	1	0	0	1	0	0	1	0	0	1	4	1	1	1	1	1	1	1	1	2	2	2	2	2	2	2	1
2	2	2	3	1	2	0	0	1	0	0	1	0	0	1	0	0	1	0	0	1	0	0	1	0	0	1	4	5	5	4	5	6	5	5	5	1	1	1	1	1	1	1	7	0	1	1	0	1	0
1	2	2	2	1	2	0	0	1	0	0	1	0	0	1	0	0	1	0	0	1	0	0	1	0	0	1	4	2	2	1	3	3	3	1	2	4	4	1	4	2	1	1	2
3	3	3	3		2	0	0	1	0	0	1	0	0	1	0	0	1	0	0	1	0	0	1	0	0	1	4	2	2	2	6	6	3	1	1	5	5	2	5	5	2	1	1
2	1	2	3	3	2	0	0	1	0	0	1	0	0	1	0	0	1	0	0	1	0	0	1	0	0	1	4	1	1	1	6	2	1	2	4	5	3	1	4	2	2	2	1
2	2	2	3	1	2	0	0	1	0	0	1	0	0	1	0	0	1	0	0	1	0	0	1	0	0	1	4	3	4	3	4	6	6	3	5	4	1	1	1	1	1	1	1
1	2	2	3	7	2	0	0	1	0	0	1	0	0	1	0	0	1	0	0	1	0	0	1	0	0	1	4	3	4	3	1	4	1	3	3	3	3	2	2	3	1	1	2
1	2	2	1	1	2	0	0	1	0	0	1	0	0	1	0	0	1	0	0	1	0	0	1	0	0	1	4	6	5	5	2	5	5	5	4	4	4	4	4	3	2	3	1
1	2	2	1	2	2	0	0	1	0	0	1	0	0	1	0	0	1	0	0	1	0	0	1	0	0	1	4	4	4	3	3	5	3	6	3	3	3	2	2	2	1	1	2
1	2	2	1	7	2	1	0	0	0	0	1	1	0	0	0	0	1	0	0	1	0	0	1	0	0	1	4	3	3	3	4	4	4	3	3	4	3	3	3	2	2	2	1
2	2	2	2	1	2	0	0	1	0	0	1	0	0	1	0	0	1	0	0	1	0	0	1	0	0	1	4	1	1	1	5	1	1	1	1	4	4	1	4	3	1	1	1
1	2	2	2	4	1	0	0	1	0	0	1	0	0	1	0	0	1	0	0	1	0	0	1	0	0	1	4	2	3	1	6	6	6	2	4	5	5	2	5	5	4	4	1
2	2	2	2	1	2	0	0	1	0	0	1	0	0	1	0	0	1	0	0	1	0	0	1	0	0	1	4	4	4	4	4	4	4	4	4	3	3	3	3	3	3	3	2
3	3	3	2	1	2	0	0	1	0	0	1	0	0	1	0	0	1	0	0	1	0	0	1	0	0	1	4	4	4	2	5	2	2	2	2	4	4	2	2	2	2	2	1
1	1	2	3	1	2	0	0	1	0	0	1	0	0	1	0	0	1	0	0	1	0	0	1	0	0	1	4	3	3	3	3	3	3	4	3	4	4	3	4	4	4	4	1
2	2	2	3	1	2	0	0	1	0	0	1	0	0	1	0	0	1	0	0	1	0	0	1	0	0	1	4	3	2	5	3	4	3	3	4	2	3	2	3	3	1	3	1
1	1	1	1	1	2	0	0	1	0	0	1	0	0	1	0	0	1	0	0	1	0	0	1	0	0	1	4	4	6	4	4	2	2	2	4	4	4	2	2	3	1	1	1
1	2	2	2	1	2	0	0	1	0	0	1	0	0	1	0	0	1	0	0	1	0	0	1	0	0	1	4	2	4	4	5	4	3	4	3	5	5	3	4	4	3	3	1
3	3	3	2		2	0	0	1	0	0	1	0	0	1	0	0	1	0	0	1	0	0	1	0	0	1	4	4	4	4	4	5	5	4	2	5	3	4	4	3	3	3	1
3	3	3	3		2	0	0	1	0	0	1	0	0	1	0	0	1	0	0	1	0	0	1	0	0	1	4	4	4	4	5	6	3	1	3	4	4	2	4	3	3	3	2
2	2	2	3	1	2	0	0	1	0	0	1	0	0	1	0	0	1	0	0	1	0	0	1	0	0	1	4	5	4	5	5	4	4	3	4	4	4	1	4	1	1	1	2
2	2	2	1	1	2	0	0	1	0	0	1	0	0	1	0	0	1	0	0	1	0	0	1	0	0	1	4	4	4	4	5	5	4	1	1	4	4	1	4	1	1	1	1
2	2	2	1		2	0	0	1	0	0	1	0	0	1	0	0	1	0	0	1	0	0	1	0	0	1	4	3	3	3	4	1	4	1	1	4	4	2	3	4	2	2	1
2	2	2	2	1	2	0	0	1	0	0	1	0	0	1	0	0	1	0	0	1	0	0	1	0	0	1	4	3	4	3	3	5	5	2	2	4	2	1	4	1	1	1	1
2	2	2	3	5	1	0	0	1	0	0	1	0	0	1	0	0	1	0	0	1	0	0	1	0	0	1	4	2	2	2	5	2	3	3	2	3	3	2	2	3	1	1	1
1	2	2	2	1	2	0	0	1	0	0	1	0	0	1	0	0	1	0	0	1	0	0	1	0	0	1	4	4	4	4	4	4	4	4	4	4	3	3	3	3	2	2	6
1	2	2	2	1	2	0	0	1	0	0	1	0	0	1	0	0	1	0	0	1	0	0	1	0	0	1	4	4	5	4	4	6	5	4	4	4	4	1	4	4	1	1	1
2	2	2	2	1	2	0	0	1	0	0	1	0	0	1	0	0	1	0	0	1	0	0	1	0	0	1	4	1	3	1	6	4	5	1	2	1	4	1	1	1	1	1	8	0	0	0	0	0	0
3	3	3	1		2	0	0	1	0	0	1	0	0	1	0	0	1	0	0	1	0	0	1	0	0	1	4	4	3	4	5	2	3	1	3	4	5	3	3	3	1	1	2
2	2	2	3	1	2	0	0	1	0	0	1	0	0	1	0	0	1	0	0	1	0	0	1	0	0	1	4	4	4	3	4	4	3	3	3	3	3	2	3	3	2	3	1
1	2	2	1	2	2	0	0	1	0	0	1	0	0	1	0	0	1	0	0	1	0	0	1	0	0	1	3	4	4	4	4	4	4	2	2	4	4	2	3	3	1	1	1
1	1	2	2	1	2	0	0	1	0	0	1	0	0	1	0	0	1	0	0	1	0	0	1	0	0	1	4	6	5	2	4	4	3	3	3	5	4	2	5	4	3	3	4
2	2	2	3	1	2	0	0	1	0	0	1	0	1	0	0	0	1	0	0	1	0	0	1	0	0	1	4	3	3	3	3	3	3	3	3	3	3	3	3	3	3	3	2
2	2	2	1	1	2	0	0	1	0	0	1	0	0	1	0	0	1	0	0	1	0	0	1	0	0	1	4	2	3	1	6	5	5	1	3	5	4	2	5	4	2	1	1
2	2	2	1	1	2	0	0	1	0	0	1	0	0	1	0	0	1	0	0	1	0	0	1	0	0	1	4	1	2	2	6	4	6	1	1	4	4	1	3	3	1	1	1
2	2	2	2	1	2	0	0	1	0	0	1	0	0	1	0	0	1	0	0	1	0	0	1	0	0	1	4	4	3	3	4	4	3	3	3	3	3	3	2	2	2	2	1
2	2	1	2	3	2	0	0	1	0	0	1	0	0	1	0	0	1	0	0	1	0	0	1	0	0	1	4	5	3	5	4	4	4	4	4	3	3	4	4	4	3	4	1
3	3	3	4		2	0	0	1	0	0	1	0	0	1	0	0	1	0	0	1	0	0	1	0	0	1	4	1	1	1	6	1	1	1	2	3	3	2	3	2	1	1	7	0	1	1	1	0	1
2	2	2	4	1	2	0	0	1	0	0	1	0	0	1	0	0	1	0	0	1	0	0	1	0	0	1	4	3	4	4	3	3	3	3	3	3	3	3	3	3	3	3	1
2	2	2	4	7	2	0	0	1	0	0	1	0	0	1	0	0	1	0	0	1	0	0	1	0	0	1	4	3	3	3	3	3	3	3	3	3	3	3	3	3	3	3	1
3	3	3	3		2	0	0	1	0	0	1	0	0	1	0	0	1	0	0	1	0	0	1	0	0	1	4	2	3	3	2	4	2	5	2	3	1	3	5	2	4	3	2
2	2	2	2	1	2	0	0	1	0	0	1	0	0	1	0	0	1	0	0	1	0	0	1	0	0	1	4	4	3	3	2	3	3	4	2	3	3	2	2	2	3	3	4
1	1	3	1	4	2	0	0	1	0	0	1	0	0	1	0	0	1	0	0	1	0	0	1	0	0	1	4	1	1	1	1	1	1	1	1	1	4	1	1	1	1	1	1
2	2	2	2	1	2	0	0	1	0	0	1	0	0	1	0	0	1	0	0	1	0	0	1	0	0	1	4	3	4	4	3	3	3	3	4	3	3	3	3	3	3	3	1
1	1	2	2	3	2	0	0	1	0	0	1	0	0	1	0	0	1	0	0	1	0	0	1	0	0	1	4	3	4	2	4	5	3	3	4	3	4	1	4	1	1	1	1
3	3	3	2	1	2	0	0	1	0	0	1	0	0	1	0	0	1	0	0	1	0	0	1	0	0	1	4	4	4	3	5	5	4	2	2	3	3	3	3	3	3	3	1
2	2	2	2		2	0	0	1	0	0	1	0	0	1	0	0	1	0	0	1	0	0	1	0	0	1	4	3	3	3	4	4	3	3	3	4	4	1	4	4	1	2	7	1	0	0	0	0	1
1	2	1	2		2	0	0	1	0	0	1	0	0	1	0	0	1	0	0	1	0	0	1	0	0	1	4	3	4	1	4	3	3	1	1	4	4	1	4	3	1	1	1
2	2	2	3	1	2	0	0	1	0	0	1	0	0	1	0	0	1	0	0	1	0	0	1	0	0	1	4	4	4	2	6	3	4	3	2	4	4	2	3	3	3	3	1
1	1	2	1	7	2	0	0	1	0	0	1	0	0	1	0	0	1	0	0	1	0	0	1	0	0	1	4	2	3	3	2	3	3	3	3	1	1	1	1	1	1	1	8	0	1	1	0	0	0
1	1	2	2	1	2	0	0	1	0	0	1	0	0	1	0	0	1	0	0	1	0	0	1	0	0	1	4	4	4	3	6	4	4	3	3	4	4	3	2	2	2	2	1
2	2	2	2	1	2	0	0	1	0	0	1	0	0	1	0	0	1	0	0	1	0	0	1	0	0	1	4	3	3	3	3	3	3	3	3	4	4	1	1	2	1	1	1
2	2	2	1	1	2	0	0	1	0	0	1	0	0	1	0	0	1	0	0	1	0	0	1	0	0	1	4	2	4	3	4	4	3	3	3	4	4	1	4	3	1	1	1
2	2	2	3	1	2	0	0	1	0	0	1	0	0	1	0	0	1	0	0	1	0	0	1	0	0	1	4	2	2	2	2	2	1	1	1	4	2	1	3	1	1	1	1
3	3	1	2		2	0	0	1	0	0	1	0	0	1	0	0	1	0	0	1	0	0	1	0	0	1	4	3	3	3	4	6	3	1	4	4	4	1	3	1	1	1	2
3	3	3	2		2	0	0	1	0	0	1	0	0	1	0	0	1	0	0	1	0	0	1	0	0	1	4	3	5	1	5	4	1	2	4	4	5	1	2	3	1	1	1
2	2	2	1	1	2	0	0	1	0	0	1	0	0	1	0	0	1	0	0	1	0	0	1	0	0	1	4	6	3	4	3	3	2	3	3	3	3	3	3	3	4	3	8	0	0	0	0	0	0
3	3	3	3		2	0	0	1	0	0	1	0	0	1	0	0	1	0	0	1	0	0	1	0	0	1	4	3	3	3	3	2	2	1	1	4	4	1	2	3	1	1	6
1	2	2	2	1	2	0	0	1	0	0	1	0	0	1	0	0	1	0	0	1	0	0	1	0	0	1	4	3	2	4	5	2	2	3	3	4	4	3	4	4	4	3	1
3	3	3	2	1	2	0	0	1	0	0	1	0	0	1	0	0	1	0	0	1	0	0	1	0	0	1	4	3	2	2	4	5	4	2	2	2	4	1	2	2	1	1	7	0	1	1	0	1	1
2	2	2	2	6	2	0	0	1	0	0	1	0	0	1	0	0	1	0	0	1	0	0	1	0	0	1	4	2	2	2	4	1	1	1	2	4	3	1	3	3	1	1	1
2	2	2	4	1	2	0	0	1	0	0	1	0	0	1	0	0	1	0	0	1	0	0	1	0	0	1	4	1	1	1	1	1	1	1	1	2	1	1	1	1	1	1	1
2	2	2	3	1	2	0	0	1	0	0	1	0	0	1	0	0	1	0	0	1	0	0	1	0	0	1	4	3	4	3	4	4	4	3	3	3	3	2	3	2	1	1	1
1	3	3	3	3	2	0	0	1	0	0	1	0	0	1	0	0	1	0	0	1	0	0	1	0	0	1	4	4	5	3	4	4	4	4	2	4	4	2	4	3	3	3	1
1	2	2	3	5	2	0	0	1	0	0	1	0	0	1	0	0	1	0	0	1	0	0	1	0	0	1	4	3	2	5	2	3	3	4	3	5	5	1	4	4	1	2	5
2	2	2	1	5	2	0	0	1	0	0	1	0	0	1	0	0	1	0	0	1	0	0	1	0	0	1	4	3	4	3	4	3	2	4	3	4	3	3	3	3	3	3	2
2	2	2	2	1	2	0	0	1	0	0	1	0	0	1	0	0	1	0	0	1	0	0	1	0	0	1	4	3	3	3	4	4	3	3	2	4	4	1	3	3	1	1	1
2	2	2	1	5	2	0	0	1	0	0	1	0	0	1	0	0	1	0	0	1	0	0	1	0	0	1	4	2	3	3	3	3	3	3	3	2	2	1	1	1	1	1	1
2	2	2	2	1	2	0	0	1	0	0	1	0	0	1	0	0	1	0	0	1	0	0	1	0	0	1	4	3	2	3	2	2	3	3	3	5	4	2	4	2	1	1	1
2	2	2	3	1	2	0	0	1	0	0	1	0	0	1	0	0	1	0	0	1	0	0	1	0	0	1	4	4	4	4	4	5	5	3	4	4	4	3	4	4	4	3	1
3	3	3	1	1	2	0	0	1	0	0	1	0	0	1	0	0	1	0	0	1	0	0	1	0	0	1	4	4	5	4	5	5	4	4	3	5	4	2	5	4	2	2	1
1	2	2	3	1	2	0	0	1	0	0	1	0	0	1	0	0	1	0	0	1	0	0	1	0	0	1	4	3	3	3	5	4	3	2	3	1	5	1	1	1	1	1	8	0	0	1	1	1	1
1	2	2	2	2	2	0	0	1	0	0	1	0	0	1	0	0	1	0	0	1	0	0	1	0	0	1	4	3	5	2	5	4	3	3	3	4	3	1	2	2	1	1	1
1	2	1	2		2	0	0	1	0	0	1	0	0	1	0	0	1	0	0	1	0	0	1	0	0	1	4	1	3	3	4	4	3	1	2	4	4	1	4	3	1	1	1
1	2	2	2	1	2	0	0	1	0	0	1	0	0	1	0	0	1	0	0	1	0	0	1	0	0	1	4	4	4	3	6	5	4	3	3	4	4	1	4	3	2	1	2
1	2	2	4	1	2	0	0	1	0	0	1	0	0	1	0	0	1	0	0	1	0	0	1	0	0	1	4	5	4	3	3	2	5	4	3	4	3	3	3	3	3	3	7	0	0	0	0	0	0
3	3	3	1		2	0	0	1	0	0	1	0	0	1	0	0	1	0	0	1	0	0	1	0	0	1	4	3	3	2	4	3	4	3	3	4	4	1	2	2	2	1	1
3	3	3	2		2	0	0	1	0	0	1	0	0	1	0	0	1	1	0	0	1	0	0	1	0	0	4	3	3	2	4	4	4	2	3	4	4	1	4	4	2	2	2
2	2	2	1	5	2	0	0	1	0	0	1	0	0	1	0	0	1	0	0	1	0	0	1	0	0	1	3	1	3	1	6	6	6	1	1	4	4	2	3	3	2	2	1
1	2	2	3	1	2	0	0	1	0	0	1	0	0	1	0	0	1	0	0	1	0	0	1	0	0	1	4	4	5	4	4	5	4	4	4	4	4	3	4	3	3	3	1
3	3	3	4		2	0	0	1	0	0	1	0	0	1	0	0	1	0	0	1	0	0	1	0	0	1	4	5	5	5	4	5	3	4	4	4	1	3	3	4	1	3	1
2	2	2	2	1	2	0	0	1	0	0	1	0	0	1	0	0	1	0	0	1	0	0	1	0	0	1	4	1	5	1	5	4	3	1	1	3	2	1	1	1	1	1	2
2	2	2	2	1	2	0	0	1	0	0	1	0	0	1	0	0	1	0	0	1	0	0	1	0	0	1	4	3	4	3	2	2	3	3	3	4	4	3	4	3	3	3	1
3	3	3	1		2	0	0	1	0	0	1	0	0	1	0	0	1	0	0	1	0	0	1	0	0	1	4	3	6	3	3	4	2	2	2	4	5	1	4	2	1	1	1
1	2	2	1	1	2	0	0	1	0	0	1	0	0	1	0	0	1	0	0	1	0	0	1	0	0	1	4	2	4	1	5	5	4	2	2	4	4	1	2	2	1	1	2
2	2	2	1	2	2	0	0	1	0	0	1	0	0	1	0	0	1	0	0	1	0	0	1	0	0	1	4	4	5	1	5	6	6	6	5	3	4	1	2	2	1	1	1
3	3	3	1		2	0	0	1	0	0	1	0	0	1	0	0	1	0	0	1	0	0	1	0	0	1	4	2	1	1	5	2	2	1	1	4	4	1	4	1	1	1	1
2	2	2	2	1	2	0	0	1	0	0	1	0	0	1	0	0	1	0	0	1	0	0	1	0	0	1	4	3	4	2	4	4	2	1	3	4	2	1	2	1	1	1	2
2	2	2	2	1	2	0	0	1	0	0	1	0	0	1	0	0	1	0	0	1	0	0	1	0	0	1	4	2	4	3	5	4	4	3	4	4	4	2	3	3	3	3	1
2	2	2	3	6	2	0	0	1	0	0	1	0	0	1	0	0	1	0	0	1	0	0	1	0	0	1	3	4	5	4	3	3	4	2	1	3	3	3	3	3	2	2	1
2	2	2	3	1	2	0	0	1	0	0	1	0	0	1	0	0	1	0	0	1	0	0	1	0	0	1	4	3	3	3	3	3	3	3	3	4	4	3	4	3	2	2	1
2	2	2	2	1	2	0	0	1	0	0	1	0	0	1	0	0	1	0	0	1	0	0	1	0	0	1	4	3	3	3	4	4	4	3	3	4	3	3	3	2	2	3	1
2	2	2	2	6	2	0	0	1	0	0	1	0	0	1	0	0	1	0	0	1	0	0	1	0	0	1	4	3	3	3	3	4	3	3	3	4	2	2	4	2	3	2	1
1	2	2	2	1	2	0	0	1	0	0	1	0	0	1	0	0	1	0	0	1	0	0	1	0	0	1	4	4	4	4	4	4	4	3	3	4	4	4	4	4	3	3	1
2	1	2	2	4	2	0	0	1	0	0	1	0	0	1	0	0	1	0	0	1	0	0	1	0	0	1	2	3	5	6	5	6	5	6	6	3	4	4	3	4	3	4	8	1	0	0	0	0	0
2	2	2	2	3	2	0	0	1	0	0	1	0	0	1	0	0	1	0	0	1	0	0	1	0	0	1	4	3	3	3	3	3	3	3	3	4	4	3	3	3	3	3	2
2	2	1	1	1	2	0	0	1	0	0	1	0	0	1	0	0	1	0	0	1	0	0	1	0	0	1	4	1	2	2	4	5	3	3	3	4	2	1	2	1	1	1	1
2	3	2	3	4	2	0	0	1	0	0	1	0	0	1	0	0	1	0	0	1	0	0	1	0	0	1	4	3	1	1	5	2	2	2	3	4	4	2	4	4	3	3	1
2	2	2	2	1	2	0	0	1	0	0	1	0	0	1	0	0	1	0	0	1	0	0	1	0	0	1	4	1	1	1	6	4	3	5	4	5	5	3	3	4	3	2	1
1	2	2	3	1	2	0	0	1	0	0	1	0	0	1	0	0	1	0	0	1	0	0	1	0	0	1	4	3	3	3	3	4	5	3	3	4	3	2	2	2	2	2	6
2	2	2	2	1	2	0	0	1	0	0	1	0	0	1	0	0	1	0	0	1	0	0	1	0	0	1	4	4	3	3	4	3	2	2	2	4	4	2	4	4	2	4	7	0	1	0	0	0	0
2	2	2	3	1	2	0	0	1	0	0	1	0	0	1	0	0	1	0	0	1	0	0	1	0	0	1	4	4	4	3	3	4	3	3	3	4	4	2	4	3	2	2	2
1	2	2	2	1	2	1	0	0	1	0	0	0	0	1	1	0	0	0	0	1	0	0	1	0	0	1	4	4	4	4	2	2	2	2	4	4	4	4	3	3	3	3	2
2	2	2	1	1	2	0	0	1	0	0	1	0	0	1	0	0	1	0	0	1	0	0	1	0	0	1	4	3	4	3	2	3	3	2	3	3	3	3	3	3	3	3	1
2	2	2	1	1	2	0	0	1	0	0	1	0	0	1	0	0	1	0	0	1	0	0	1	0	0	1	4	4	4	1	5	6	4	1	1	4	4	2	4	2	1	1	2
1	3	3	1	1	2	0	0	1	0	0	1	0	0	1	0	0	1	0	0	1	0	0	1	0	0	1	4	1	1	1	1	1	1	1	1	5	4	5	4	4	5	4	1
1	1	3	1	1	2	0	0	1	0	0	1	0	0	1	0	0	1	0	0	1	0	0	1	0	0	1	4	3	3	3	6	4	3	3	3	5	5	3	5	5	1	1	5
2	2	2	4	1	2	0	0	1	0	0	1	0	0	1	0	0	1	0	0	1	0	0	1	0	0	1	3	3	4	2	4	4	5	4	3	5	5	3	4	4	4	2	1
3	3	3	2	6	2	0	0	1	0	0	1	0	0	1	0	0	1	0	0	1	0	0	1	0	0	1	3	4	4	2	4	4	4	3	3	4	3	1	3	2	2	2	1
1	2	2	1	7	2	0	0	1	0	0	1	0	0	1	0	0	1	0	0	1	0	0	1	0	0	1	4	2	2	2	2	2	2	2	2	5	3	2	4	2	4	2	1
2	2	2	1	1	2	0	0	1	0	0	1	0	0	1	0	0	1	0	0	1	0	0	1	0	0	1	4	1	3	1	1	4	2	2	2	4	5	1	4	4	1	1	1
1	3	1	2		2	0	0	1	0	0	1	0	0	1	0	0	1	0	0	1	0	0	1	0	0	1	4	3	4	4	5	6	5	5	4	3	3	1	1	1	1	1	2
2	2	2	2	1	2	0	0	1	0	0	1	0	0	1	0	0	1	0	0	1	0	0	1	0	0	1	4	4	4	3	4	5	4	2	3	4	4	2	3	3	1	3	2
3	3	3	2	6	2	0	0	1	0	0	1	0	0	1	0	0	1	0	0	1	0	0	1	0	0	1	4	4	2	3	4	3	3	3	4	3	4	3	3	3	4	3	1
1	2	2	3	7	2	0	0	1	0	0	1	0	0	1	0	0	1	0	0	1	0	0	1	0	0	1	4	5	5	5	5	4	4	4	4	4	4	3	3	3	2	3	1
2	2	2	2	1	2	0	0	1	0	0	1	0	0	1	0	0	1	0	0	1	0	0	1	0	0	1	4	4	4	4	4	3	4	4	4	4	4	2	3	2	2	2	2
2	2	2	1	1	2	0	0	1	0	0	1	0	0	1	0	0	1	0	0	1	0	0	1	0	0	1	4	3	3	3	3	3	3	3	3	1	1	1	1	1	1	1	1
2	2	2	3	1	2	0	0	1	0	0	1	0	0	1	0	0	1	0	0	1	0	0	1	0	0	1	4	3	3	3	3	3	3	3	3	3	3	3	3	3	3	3	1
2	2	2	1	6	2	0	0	1	0	0	1	0	0	1	0	0	1	0	0	1	0	0	1	0	0	1	4	1	1	1	3	4	1	1	1	3	1	1	1	1	1	1	1
2	2	2	2	1	2	0	0	1	0	0	1	0	0	1	0	0	1	0	0	1	0	0	1	0	0	1	4	3	3	4	4	3	3	4	3	3	4	1	4	1	1	1	1
1	2	1	3	1	2	0	0	1	0	0	1	0	0	1	0	0	1	0	0	1	0	0	1	0	0	1	4	4	4	4	4	3	3	3	3	4	4	2	4	2	2	2	7	0	1	0	0	0	0
3	3	3	2		2	0	0	1	0	0	1	0	0	1	0	0	1	0	0	1	0	0	1	0	0	1	4	2	4	2	3	3	3	2	3	4	4	2	3	3	2	2	1
1	1	2	1	1	2	0	0	1	0	0	1	0	0	1	0	0	1	0	0	1	0	0	1	0	0	1	4	4	2	4	3	3	3	3	3	4	4	1	3	2	3	1	6
1	2	2	2	7	2	0	0	1	0	0	1	0	0	1	0	0	1	0	0	1	0	0	1	0	0	1	4	2	3	3	3	4	4	4	3	4	3	2	4	3	2	2	1
2	2	2	1	1	2	0	0	1	0	0	1	0	0	1	0	0	1	0	0	1	0	0	1	0	0	1	4	1	1	1	1	2	1	1	2	2	1	1	1	1	1	1	1
2	2	2	2	5	2	0	0	1	0	0	1	0	0	1	0	0	1	0	0	1	0	0	1	0	0	1	4	3	3	3	2	3	1	3	6	4	4	4	4	4	4	4	1
3	3	3	3		2	0	0	1	0	0	1	0	0	1	0	0	1	0	0	1	0	0	1	0	0	1	4	2	2	2	2	2	2	2	2	5	5	3	5	4	3	4	1
2	2	2	4	3	1	0	0	1	0	0	1	0	0	1	0	0	1	0	0	1	0	0	1	0	0	1	4	3	3	3	3	4	3	4	3	3	3	2	3	3	3	3	1
2	3	1	3		2	0	0	1	0	0	1	0	0	1	0	0	1	0	0	1	0	0	1	0	0	1	4	5	4	3	6	3	5	1	4	5	4	1	4	1	1	1	1
2	2	2	2	5	2	0	0	1	0	0	1	0	0	1	0	0	1	0	0	1	0	0	1	0	0	1	4	3	3	3	4	4	4	3	2	4	4	1	2	4	2	1	1
2	2	2	2	3	2	0	0	1	0	0	1	0	0	1	0	0	1	0	0	1	0	0	1	0	0	1	4	3	4	1	2	3	3	3	3	2	2	2	2	2	2	2	1
2	2	2	2	1	2	0	0	1	0	0	1	0	0	1	0	0	1	0	0	1	0	0	1	0	0	1	4	2	6	2	4	5	6	6	6	5	5	1	4	2	1	1	1
2	2	2	1	7	2	0	0	1	0	0	1	0	0	1	0	0	1	0	0	1	0	0	1	0	0	1	4	3	4	2	3	4	4	4	4	3	3	1	1	3	1	1	1
2	2	2	4	1	1	0	0	1	0	0	1	0	0	1	0	0	1	0	0	1	0	0	1	0	0	1	2	2	3	3	2	5	3	3	3	1	1	1	1	2	1	1	8	0	0	0	0	0	0
2	2	2	4	1	2	0	0	1	0	0	1	0	0	1	0	0	1	0	0	1	0	0	1	0	0	1	4	4	4	3	3	3	3	3	2	1	1	1	2	1	1	1	7	0	0	0	0	0	0
2	2	2	2	1	2	0	0	1	0	0	1	0	0	1	0	0	1	0	0	1	0	0	1	0	0	1	4	3	3	5	4	5	4	4	4	3	3	3	2	3	3	2	1
2	1	1	2	1	2	1	0	0	0	0	1	0	0	1	0	0	1	0	0	1	0	0	1	0	0	1	4	4	6	4	4	1	3	3	2	1	1	1	1	1	1	1	1
1	2	2	3	1	2	0	0	1	0	0	1	0	0	1	0	0	1	0	0	1	0	0	1	0	0	1	4	1	1	1	1	1	1	1	1	5	5	3	2	4	3	3	7	1	0	0	0	0	0
2	2	2	2	7	2	0	0	1	0	0	1	0	0	1	0	0	1	0	0	1	0	0	1	0	0	1	4	1	1	1	1	3	1	3	3	2	1	1	1	1	1	1	1
2	2	2	1		2	0	0	1	0	0	1	0	0	1	0	0	1	0	0	1	0	0	1	0	0	1	4	3	3	3	3	4	3	3	3	4	3	1	4	2	1	1	1
2	2	2	2	1	2	0	0	1	0	0	1	0	0	1	0	0	1	0	0	1	0	0	1	0	0	1	4	6	5	4	4	4	4	4	4	3	3	2	2	2	2	2	1
3	2	2	3	1	2	0	0	1	0	0	1	0	0	1	0	0	1	0	0	1	0	0	1	0	0	1	4	1	4	1	3	3	3	3	1	4	4	1	4	2	2	2	1
2	2	2	2	1	2	0	0	1	0	0	1	0	0	1	0	0	1	0	0	1	0	0	1	0	0	1	4	1	1	1	6	2	2	1	2	4	5	1	2	2	1	1	8	0	1	0	0	0	0
2	2	2	2		2	0	0	1	0	0	1	0	0	1	0	0	1	0	0	1	0	0	1	0	0	1	4	1	2	1	4	4	4	1	3	5	4	1	4	4	2	1	7	0	1	1	0	1	1
2	2	2	1	1	2	0	0	1	0	0	1	0	0	1	0	0	1	0	0	1	0	0	1	0	0	1	4	4	4	3	4	2	3	4	4	4	4	2	3	3	2	3	1
2	3	2	4	1	2	0	0	1	0	0	1	0	0	1	0	0	1	0	0	1	0	0	1	0	0	1	4	3	6	5	4	4	5	4	3	3	4	3	3	4	4	3	1
2	2	2	2	1	2	0	0	1	0	0	1	0	0	1	0	0	1	0	0	1	0	0	1	0	0	1	4	3	2	3	3	4	4	3	3	4	3	1	1	1	1	1	1
3	3	3	1	3	2	0	0	1	0	0	1	0	0	1	0	0	1	0	0	1	0	0	1	0	0	1	4	3	3	3	4	3	4	3	3	4	2	1	1	1	1	1	1
3	3	3	3	1	2	0	0	1	0	0	1	0	0	1	0	0	1	0	0	1	0	0	1	0	0	1	4	3	3	3	3	3	3	3	3	4	1	1	1	1	1	1	1
3	3	3	2		1	0	0	1	0	0	1	0	0	1	0	0	1	0	0	1	0	0	1	0	0	1	4	2	4	1	5	3	2	1	1	4	3	1	3	2	1	2	1
2	2	2	3	1	2	0	0	1	0	0	1	0	0	1	0	0	1	0	0	1	0	0	1	0	0	1	4	4	3	3	4	5	4	2	3	3	3	2	2	2	1	1	1
2	2	2	2	1	2	0	0	1	0	0	1	0	0	1	0	0	1	0	0	1	0	0	1	0	0	1	4	3	3	3	3	3	3	3	4	4	4	3	4	3	3	3	1
3	3	3	2		2	0	0	1	0	0	1	0	0	1	0	0	1	0	0	1	0	0	1	0	0	1	4	4	4	4	5	4	4	4	3	4	3	2	3	2	3	3	1
2	2	2	1	1	2	0	0	1	0	0	1	0	0	1	0	0	1	0	0	1	0	0	1	0	0	1	4	3	5	6	3	4	4	3	4	4	4	3	4	4	2	1	6
2	3	1	3	3	2	0	0	1	0	0	1	0	0	1	0	0	1	0	0	1	0	0	1	0	0	1	3	5	4	4	4	4	6	4	6	3	4	4	2	2	2	4	1
3	3	3	1		2	0	0	1	0	0	1	0	0	1	0	0	1	0	0	1	0	0	1	0	0	1	4	1	2	1	2	4	1	1	1	5	4	1	5	4	1	1	1
2	2	2	1	3	2	0	0	1	0	0	1	0	0	1	0	0	1	0	0	1	0	0	1	0	0	1	4	4	4	4	6	5	5	3	4	5	4	1	4	2	1	1	1
1	2	2	3	1	2	0	0	1	0	0	1	0	0	1	0	0	1	0	0	1	0	0	1	0	0	1	4	3	4	1	5	4	3	3	3	3	3	2	2	2	2	2	1
2	2	2	3	1	1	0	0	1	0	0	1	0	0	1	0	0	1	0	0	1	0	0	1	0	0	1	4	6	6	6	6	6	6	6	6	5	5	5	5	5	5	5	1
3	3	3	3		2	0	0	1	0	0	1	0	0	1	0	0	1	0	0	1	0	0	1	0	0	1	4	5	4	4	4	1	1	1	2	3	3	1	4	1	1	1	2
2	2	2	1	6	2	0	0	1	0	0	1	0	0	1	0	0	1	0	0	1	0	0	1	0	0	1	4	1	1	2	4	4	2	6	6	4	2	1	4	2	1	1	1
2	2	2	2	1	2	0	0	1	0	0	1	0	0	1	0	0	1	0	0	1	0	0	1	0	0	1	3	3	3	3	6	1	2	1	1	5	5	5	5	5	5	4	1
1	2	2	3	1	2	0	0	1	0	0	1	0	0	1	0	0	1	0	0	1	0	0	1	0	0	1	4	3	4	3	6	6	5	3	5	4	2	1	4	4	1	1	1
2	2	2	3	1	2	0	0	1	0	0	1	0	0	1	0	0	1	0	0	1	0	0	1	0	0	1	4	4	4	3	6	4	4	2	4	4	4	1	2	3	1	1	6
2	2	2	2	3	2	0	0	1	0	0	1	0	0	1	0	0	1	0	0	1	0	0	1	0	0	1	4	4	5	3	3	4	3	6	3	3	3	1	2	2	1	1	1
2	2	2	2	1	2	0	0	1	0	0	1	0	0	1	0	0	1	0	0	1	0	1	0	0	0	1	4	5	3	5	5	3	4	4	4	4	4	1	3	4	3	3	1
3	3	3	2		2	0	0	1	0	0	1	0	0	1	0	0	1	0	0	1	0	0	1	0	0	1	4	3	3	3	4	4	3	3	3	3	3	1	2	3	3	2	8	0	1	1	0	0	1
3	3	3	2		2	0	0	1	0	0	1	0	0	1	0	0	1	0	0	1	0	0	1	0	0	1	4	5	5	5	5	5	2	2	5	4	4	1	4	2	1	1	2
3	3	3	2		2	0	0	1	0	0	1	0	0	1	0	0	1	0	0	1	0	0	1	0	0	1	4	2	3	2	6	4	2	1	1	4	4	1	3	2	2	2	2
3	3	3	3		2	0	0	1	0	0	1	0	0	1	0	0	1	0	0	1	0	0	1	0	0	1	4	3	3	3	3	2	2	3	2	5	5	3	5	3	1	1	7	0	1	0	1	0	0
2	2	2	3	1	2	0	0	1	0	0	1	0	0	1	0	0	1	0	0	1	0	0	1	0	0	1	4	3	3	3	4	4	3	4	4	3	3	2	3	4	3	3	1
2	2	2	4	1	2	1	0	0	0	0	1	0	0	1	0	0	1	1	0	0	0	0	1	0	0	1	4	2	2	2	4	6	4	1	1	2	2	1	2	2	1	1	1
1	1	2	3	4	2	0	0	1	0	0	1	0	0	1	0	0	1	0	0	1	0	0	1	0	0	1	4	4	4	2	4	5	4	4	4	3	2	3	3	3	3	4	1
2	2	2	1	1	2	0	0	1	0	0	1	0	0	1	0	0	1	0	0	1	0	0	1	0	0	1	4	4	3	4	3	3	3	4	3	4	4	5	4	4	4	4	1
1	2	2	3	1	2	0	0	1	0	0	1	0	0	1	0	0	1	0	0	1	0	0	1	0	0	1	4	4	5	3	4	4	4	3	4	4	4	1	4	4	1	1	2
2	2	2	3	1	2	0	0	1	0	0	1	0	0	1	0	0	1	0	0	1	0	0	1	0	0	1	4	1	4	2	3	2	2	2	2	5	5	2	5	5	3	3	1
1	1	3	3		2	0	0	1	0	0	1	0	0	1	0	0	1	0	0	1	0	0	1	0	0	1	4	4	3	3	4	3	3	2	3	2	2	1	4	2	1	1	8	0	0	0	0	0	1
2	2	2	3	1	2	0	0	1	0	0	1	0	0	1	0	0	1	0	0	1	0	0	1	0	0	1	4	2	2	3	4	4	3	2	3	4	4	1	3	4	3	2	1
2	2	2	2	1	2	0	0	1	0	0	1	0	0	1	0	0	1	0	0	1	0	0	1	0	0	1	4	1	2	1	1	1	1	6	4	3	3	1	2	1	1	1	1
2	2	2	1	1	2	0	0	1	0	0	1	0	0	1	0	0	1	0	0	1	0	0	1	0	0	1	4	2	2	2	5	4	2	2	2	5	4	1	3	2	1	1	1
2	2	2	3	3	2	0	0	1	0	0	1	0	0	1	0	0	1	0	0	1	0	0	1	0	0	1	4	3	3	3	3	3	3	3	3	2	3	2	2	2	2	2	8	0	1	0	0	0	1
1	2	2	4	7	1	0	0	1	0	0	1	0	0	1	0	0	1	0	0	1	0	0	1	0	0	1	4	3	4	1	6	4	4	1	4	4	4	1	5	3	2	1	1
1	2	2	3	1	2	0	0	1	0	0	1	0	0	1	0	0	1	0	0	1	0	0	1	0	0	1	4	4	4	4	4	4	2	4	5	4	4	1	4	2	1	2	1
2	2	2	2	1	2	0	0	1	0	0	1	0	0	1	0	0	1	0	0	1	0	0	1	0	0	1	4	3	1	1	4	4	1	1	1	4	4	1	1	4	1	1	1
2	2	2	2	1	2	0	0	1	0	0	1	0	0	1	0	0	1	0	0	1	0	0	1	0	0	1	4	3	4	3	3	3	3	3	3	4	4	2	3	4	2	2	1
2	2	2	3	1	1	0	0	1	0	0	1	0	0	1	0	0	1	0	0	1	0	0	1	0	0	1	4	3	3	1	4	4	4	3	4	5	5	4	4	4	2	3	2
2	2	2	3	1	2	0	0	1	0	0	1	0	0	1	0	0	1	0	0	1	0	0	1	0	0	1	4	4	2	3	2	4	4	5	4	5	4	3	4	4	3	2	1
2	2	2	3	2	1	0	0	1	0	0	1	0	0	1	0	0	1	0	0	1	0	0	1	0	0	1	4	3	3	2	3	4	3	2	2	5	4	2	3	2	2	2	1
2	2	2	3	1	2	0	0	1	0	0	1	0	0	1	0	0	1	0	0	1	0	0	1	0	0	1	4	3	3	2	1	3	4	3	3	3	3	2	2	3	3	4	4
1	2	2	2	1	2	0	0	1	0	0	1	0	0	1	0	0	1	0	0	1	0	0	1	0	0	1	4	4	4	4	5	5	5	1	4	4	4	2	3	4	2	2	1
2	2	2	3	1	2	0	0	1	0	0	1	0	0	1	0	0	1	0	0	1	0	0	1	0	0	1	4	3	3	3	3	2	3	3	3	2	2	1	2	2	1	1	1
2	2	2	2	1	2	0	0	1	0	0	1	0	0	1	0	0	1	0	0	1	0	0	1	0	0	1	4	3	4	3	5	4	4	2	2	4	4	1	2	3	1	1	1
2	2	2	2	1	2	0	0	1	0	0	1	0	0	1	0	0	1	0	0	1	0	0	1	0	0	1	4	4	4	2	4	4	2	2	3	4	4	2	4	3	1	1	1
2	2	2	1	1	2	0	0	1	0	0	1	0	0	1	0	0	1	0	0	1	0	0	1	0	0	1	4	1	4	1	4	4	2	1	1	3	3	3	3	3	3	3	1
2	2	2	1	1	2	0	0	1	0	0	1	0	0	1	0	0	1	0	0	1	0	0	1	0	0	1	4	2	2	2	4	4	2	2	2	4	4	1	1	4	1	1	1
2	2	2	2	3	2	0	0	1	0	0	1	0	0	1	0	0	1	0	0	1	0	0	1	0	0	1	4	3	6	2	4	5	5	2	2	4	4	1	2	2	1	1	1
1	2	2	4	5	2	0	0	1	0	0	1	0	0	1	0	0	1	0	0	1	0	0	1	0	0	1	4	3	4	3	5	5	3	1	3	4	5	1	4	4	1	1	1
3	3	1	1		2	0	0	1	0	0	1	0	0	1	0	0	1	0	0	1	0	0	1	0	0	1	4	3	3	4	4	6	4	3	3	4	3	2	2	2	2	2	2
1	2	2	2	1	2	0	0	1	0	0	1	0	0	1	0	0	1	0	0	1	0	0	1	0	0	1	4	4	4	2	6	6	2	4	6	2	2	1	1	1	1	1	1
2	2	2	1	5	2	0	0	1	0	0	1	0	0	1	0	0	1	0	0	1	0	0	1	0	0	1	4	2	4	3	6	6	6	2	4	4	4	2	2	3	1	1	6
2	2	2	2	1	1	0	0	1	0	0	1	0	0	1	0	0	1	0	0	1	0	0	1	0	0	1	4	3	3	3	3	4	2	3	3	5	4	1	4	4	2	1	1
2	2	2	3	1	2	0	0	1	0	0	1	0	0	1	0	0	1	0	0	1	0	0	1	0	0	1	4	4	4	4	4	5	5	4	3	2	2	3	3	3	3	5	1
2	2	2	2	1	2	0	0	1	0	0	1	0	0	1	0	0	1	0	0	1	0	0	1	0	0	1	4	3	3	4	3	3	3	3	3	4	4	3	3	3	3	3	1
2	2	2	2	5	2	0	0	1	0	0	1	0	0	1	0	0	1	0	0	1	0	0	1	0	0	1	4	3	4	3	4	2	2	2	3	4	3	2	3	3	1	1	1
2	2	2	2	1	2	0	0	1	0	0	1	0	0	1	0	0	1	0	0	1	0	0	1	0	0	1	4	3	4	3	4	5	4	2	3	3	3	1	3	3	1	1	1
2	2	2	3	1	2	0	0	1	0	0	1	0	0	1	0	0	1	0	0	1	0	0	1	0	0	1	4	4	4	4	4	5	4	3	3	4	4	2	3	3	2	2	6
2	2	2	4	1	2	1	0	0	0	0	1	1	0	0	0	0	1	0	0	1	0	0	1	0	0	1	3	4	5	5	5	6	5	2	2	4	2	1	1	1	1	1	2
2	2	2	2	1	2	0	0	1	0	0	1	0	0	1	0	0	1	0	0	1	0	0	1	0	0	1	4	4	5	2	4	6	4	2	2	2	4	1	1	3	1	1	1
2	2	2	3	1	2	0	0	1	0	0	1	0	0	1	0	0	1	0	0	1	0	0	1	0	0	1	4	3	2	2	4	5	5	3	4	2	2	2	3	3	2	1	7	0	1	0	0	0	1
1	2	2	3	1	2	0	0	1	0	0	1	0	0	1	0	0	1	0	0	1	0	0	1	0	0	1	1	1	3	1	5	2	2	1	1	1	5	1	1	3	1	1	1
1	2	2	2	1	2	0	0	1	0	0	1	0	0	1	0	0	1	0	0	1	0	0	1	0	0	1	4	3	5	3	5	5	3	4	4	2	1	1	1	1	1	1	1
2	2	2	3	1	2	0	0	1	0	0	1	0	0	1	0	0	1	0	0	1	0	0	1	0	0	1	4	5	3	4	3	3	4	3	5	4	3	2	3	4	3	4	1
3	3	3	2		2	0	0	1	0	0	1	0	0	1	0	0	1	0	0	1	0	0	1	0	0	1	4	3	4	2	4	3	4	3	4	4	2	1	1	3	1	1	2
3	3	3	1	1	1	0	0	1	0	0	1	0	0	1	0	0	1	0	0	1	0	0	1	0	0	1	4	3	4	3	4	4	4	3	3	4	1	1	1	2	1	1	1
1	2	2	2	1	2	0	0	1	0	0	1	0	0	1	0	0	1	0	0	1	0	0	1	0	0	1	4	4	4	4	4	3	3	4	3	3	3	2	4	3	3	2	1
2	2	2	2	1	2	0	0	1	0	0	1	0	0	1	0	0	1	0	0	1	0	0	1	0	0	1	4	4	6	6	6	6	6	2	6	5	1	1	5	2	1	1	1
2	2	2	2	1	2	0	0	1	0	0	1	0	0	1	0	0	1	0	0	1	0	0	1	0	0	1	4	4	4	4	6	4	4	4	5	4	4	2	3	3	2	2	7	0	1	1	1	0	1
1	2	2	1	1	2	0	0	1	0	0	1	0	0	1	0	0	1	0	0	1	0	0	1	0	0	1	4	4	4	3	5	5	4	4	3	3	3	3	3	3	3	3	8	0	0	0	0	1	1
3	3	3	3		2	0	0	1	0	0	1	0	0	1	0	0	1	0	0	1	0	0	1	0	0	1	4	1	1	1	4	3	4	1	1	3	3	1	2	2	1	1	1
1	2	2	3	2	2	0	0	1	0	0	1	0	0	1	0	0	1	0	0	1	0	0	1	0	0	1	4	4	5	4	4	4	4	3	4	4	4	2	4	4	2	2	7	0	1	0	0	0	0
2	2	2	2	1	2	0	0	1	0	0	1	0	0	1	0	0	1	0	0	1	0	0	1	0	0	1	4	4	4	3	3	4	4	4	4	3	3	2	3	2	2	2	2
1	2	1	3	1	2	0	0	1	0	0	1	0	0	1	0	0	1	0	0	1	0	0	1	0	0	1	4	3	3	3	3	4	3	3	3	4	4	3	2	4	2	2	1
2	2	2	2	1	2	0	0	1	0	0	1	0	0	1	0	0	1	0	0	1	0	0	1	0	0	1	4	3	3	3	5	4	3	3	3	1	1	1	1	1	1	1	1
1	2	2	1	1	2	0	0	1	0	0	1	0	0	1	0	0	1	0	0	1	0	0	1	0	0	1	4	5	4	3	6	6	4	6	6	5	4	1	2	3	1	1	1
2	2	2	3	5	2	0	0	1	0	0	1	0	0	1	0	0	1	0	0	1	0	0	1	0	0	1	4	3	5	3	1	3	2	3	1	5	1	4	3	4	3	3	1
3	3	3	3		2	0	0	1	0	0	1	0	0	1	0	0	1	0	0	1	0	0	1	0	0	1	4	3	2	1	6	5	4	1	3	5	1	3	5	4	1	2	2
2	2	2	1	1	2	0	0	1	0	0	1	0	0	1	0	0	1	0	0	1	0	0	1	0	0	1	4	2	4	2	5	4	4	4	5	2	4	1	1	2	1	1	1
3	3	3	1		2	0	0	1	0	0	1	0	0	1	0	0	1	0	0	1	0	0	1	0	0	1	4	4	4	4	4	3	3	3	3	4	3	1	3	2	2	1	7	0	1	0	0	0	0
1	2	2	1	1	2	0	0	1	0	0	1	0	0	1	0	0	1	0	0	1	0	0	1	0	0	1	4	2	2	1	4	5	3	3	2	3	2	1	3	1	1	1	1
2	2	2	3	6	2	0	0	1	0	0	1	0	0	1	0	0	1	0	0	1	0	0	1	0	0	1	4	3	4	3	3	3	3	4	4	4	4	3	2	2	2	2	1
2	2	2	2	1	2	0	0	1	0	0	1	0	0	1	0	0	1	0	0	1	0	0	1	0	0	1	4	4	4	1	3	2	2	1	1	1	3	1	1	1	1	1	1
2	2	2	1	1	2	0	0	1	0	0	1	0	0	1	0	0	1	0	0	1	0	0	1	0	0	1	3	4	3	3	5	4	2	4	4	4	4	1	4	4	4	1	1
3	3	3	1		2	0	0	1	0	0	1	0	0	1	0	0	1	0	0	1	0	0	1	0	0	1	4	1	4	3	5	4	4	1	1	4	4	1	4	3	1	1	1
2	2	2	3	2	2	0	0	1	0	0	1	0	0	1	0	0	1	0	0	1	0	0	1	0	0	1	4	3	3	3	3	3	3	4	3	3	3	3	3	3	3	3	1
2	2	2	1	1	2	0	0	1	0	0	1	0	0	1	0	0	1	0	0	1	0	0	1	0	0	1	4	4	4	4	5	6	4	5	3	5	4	3	5	4	2	4	1
2	2	2	2	1	2	0	0	1	0	0	1	0	0	1	0	0	1	0	0	1	0	0	1	0	0	1	4	4	4	4	4	4	3	3	4	3	5	3	4	4	2	2	1
1	1	2	1	1	2	0	0	1	0	0	1	0	0	1	0	0	1	0	0	1	0	0	1	0	0	1	4	4	4	4	4	4	3	3	4	4	4	2	5	4	2	2	6
2	2	2	3	7	2	0	0	1	0	0	1	0	0	1	0	0	1	0	0	1	0	0	1	0	0	1	4	4	5	2	2	4	3	2	2	2	2	2	2	2	2	2	6
1	1	1	3	1	2	0	0	1	0	0	1	0	0	1	0	0	1	0	0	1	0	0	1	0	0	1	4	4	4	3	4	3	3	3	3	4	4	2	4	4	2	2	1
2	2	2	4	1	2	0	0	1	0	0	1	0	0	1	0	0	1	0	0	1	0	0	1	0	0	1	4	4	4	4	4	2	4	3	4	4	4	3	4	3	5	3	1
2	2	2	2	1	2	0	0	1	0	0	1	0	0	1	0	0	1	0	0	1	0	0	1	0	0	1	4	4	5	2	2	5	3	2	2	5	5	1	5	4	1	1	1
2	2	2	1	1	2	0	0	1	0	0	1	0	0	1	0	0	1	0	0	1	0	0	1	0	0	1	4	2	3	2	4	4	4	4	5	4	3	1	4	1	1	1	6
2	2	2	3	1	2	0	0	1	0	0	1	0	0	1	0	0	1	0	0	1	0	0	1	0	0	1	4	4	5	4	2	5	4	3	3	4	3	3	4	3	2	2	2
1	1	3	2	1	2	0	0	1	0	0	1	0	0	1	0	0	1	0	0	1	0	0	1	0	0	1	4	4	4	4	4	4	3	4	3	1	5	3	1	2	2	2	8	0	0	0	0	0	0
2	2	2	2	1	2	0	0	1	0	0	1	0	0	1	0	0	1	0	0	1	0	0	1	0	0	1	4	4	4	3	3	4	3	4	4	3	3	3	3	3	3	3	1
3	3	3	3		2	0	0	1	0	0	1	0	0	1	0	0	1	0	0	1	0	0	1	0	0	1	4	4	3	3	5	5	4	2	3	4	4	2	4	4	2	2	7	0	1	1	1	1	1
1	1	1	1	5	1	0	0	1	0	0	1	0	0	1	0	0	1	1	0	0	1	0	0	1	0	0	2	3	3	3	5	3	4	2	4	4	4	5	5	4	5	4	2
1	2	2	1	1	2	0	0	1	0	0	1	0	0	1	0	0	1	0	0	1	0	0	1	0	0	1	4	4	4	3	5	4	3	3	4	4	4	2	3	1	1	1	1
2	2	2	3	5	2	0	0	1	0	0	1	0	0	1	0	0	1	0	0	1	0	0	1	0	0	1	4	3	3	3	3	3	3	3	3	4	4	4	4	4	4	4	1
2	2	2	3	1	2	0	0	1	0	0	1	0	0	1	0	0	1	0	0	1	0	0	1	0	0	1	4	2	4	3	4	4	4	2	2	5	5	4	4	4	4	4	6
3	3	1	3	1	2	0	0	1	0	0	1	0	0	1	0	0	1	0	0	1	0	0	1	0	0	1	3	4	4	4	5	4	4	2	4	4	4	1	4	3	3	3	1
2	2	2	3	6	2	0	0	1	0	0	1	0	0	1	0	0	1	0	0	1	0	0	1	0	0	1	4	3	3	4	4	5	5	5	4	3	3	3	3	3	4	3	1
1	2	2	2	1	2	0	0	1	0	0	1	0	0	1	0	0	1	0	0	1	0	0	1	0	0	1	4	6	4	3	2	2	4	2	2	5	5	5	5	5	5	5	2
2	2	2	2	1	1	0	0	1	0	0	1	0	0	1	0	0	1	0	0	1	0	0	1	0	0	1	4	4	4	4	5	3	3	3	2	4	4	2	3	4	2	2	7	0	0	0	0	0	0
2	2	2	1	1	2	0	0	1	0	0	1	0	0	1	0	0	1	0	0	1	0	0	1	0	0	1	4	5	5	4	5	6	6	4	3	4	4	1	4	2	1	1	1
3	3	3	2		2	0	0	1	0	0	1	0	0	1	0	0	1	0	0	1	0	0	1	0	0	1	4	4	5	3	4	6	4	3	3	5	5	1	4	4	2	1	1
1	3	3	2		2	0	0	1	0	0	1	0	0	1	0	0	1	0	0	1	0	0	1	0	0	1	4	3	4	2	5	4	3	1	1	5	5	1	5	1	1	1	1
2	2	2	3	6	2	0	0	1	0	0	1	0	0	1	0	0	1	0	0	1	0	0	1	0	0	1	4	3	3	1	2	2	2	2	2	3	3	2	2	2	2	2	1
1	2	1	1	6	1	0	0	1	0	0	1	0	0	1	0	0	1	0	0	1	0	0	1	0	0	1	4	2	2	2	5	2	2	1	1	1	1	1	1	1	1	1	1
3	3	3	2	1	2	0	0	1	0	0	1	0	0	1	0	0	1	0	0	1	0	0	1	0	0	1	4	3	3	3	3	3	3	3	3	4	3	3	3	3	3	3	1
2	2	2	1	2	2	0	0	1	0	0	1	0	0	1	0	0	1	0	0	1	0	0	1	0	0	1	4	5	6	5	6	6	5	1	6	5	5	3	1	3	1	1	1
1	2	2	4	1	2	0	0	1	0	0	1	0	0	1	0	0	1	0	0	1	0	0	1	0	0	1	4	3	3	3	3	4	3	3	3	4	3	3	4	3	1	1	1
2	2	2	1	5	2	0	0	1	0	0	1	0	0	1	0	0	1	0	0	1	0	0	1	0	0	1	4	1	1	1	3	6	6	3	3	1	1	1	1	1	1	1	1
2	2	2	2	1	1	0	0	1	0	0	1	0	0	1	0	0	1	0	0	1	0	0	1	0	0	1	4	3	3	3	5	4	5	3	5	4	4	2	4	4	2	2	1
2	2	2	1	1	2	0	0	1	0	0	1	0	0	1	0	0	1	0	0	1	0	0	1	0	0	1	4	2	4	3	6	4	3	2	3	4	3	1	2	1	1	1	1
2	2	2	3		2	0	0	1	0	0	1	0	0	1	0	0	1	0	0	1	0	0	1	0	0	1	4	3	3	3	4	4	3	2	4	3	3	1	4	2	1	1	1
1	2	2	2	1	2	0	0	1	0	0	1	0	0	1	0	0	1	0	0	1	0	0	1	0	0	1	4	4	4	4	4	4	4	4	4	4	3	3	3	3	3	3	1
2	2	2	3	1	1	0	0	1	0	0	1	0	0	1	0	0	1	0	0	1	0	0	1	0	0	1	4	3	3	4	4	3	3	4	4	3	3	2	2	2	2	1	1
3	3	3	1		2	0	0	1	0	0	1	0	0	1	0	0	1	0	0	1	0	0	1	0	0	1	4	3	3	3	3	3	3	3	3	4	4	2	3	3	2	2	1
3	3	3	2		2	0	0	1	0	0	1	0	0	1	0	0	1	0	0	1	0	0	1	0	0	1	4	4	4	4	4	5	4	3	3	4	3	3	3	3	3	3	6
2	2	2	2	4	2	0	0	1	0	0	1	0	0	1	0	0	1	0	0	1	0	0	1	0	0	1	4	5	5	4	4	6	4	5	4	3	2	3	3	2	2	4	1
2	2	1	3	3	2	0	0	1	0	0	1	0	0	1	0	0	1	0	0	1	0	0	1	0	0	1	4	4	4	2	4	4	3	3	3	4	4	1	4	1	3	1	1
2	2	2	3	1	2	0	0	1	0	0	1	0	0	1	0	0	1	0	0	1	0	0	1	0	0	1	4	3	5	4	4	2	4	4	5	2	2	2	2	2	2	2	1
2	2	2	3	7	2	0	0	1	0	0	1	0	0	1	0	0	1	0	0	1	0	0	1	0	0	1	4	1	4	4	4	3	1	1	1	3	3	1	3	3	1	1	1
2	2	2	1	5	2	0	0	1	0	0	1	0	0	1	0	0	1	0	0	1	0	0	1	0	0	1	4	1	4	1	3	5	4	1	1	2	2	1	2	2	1	1	1
1	1	2	3	1	1	0	0	1	0	0	1	0	0	1	0	0	1	0	0	1	0	0	1	0	0	1	4	3	3	2	5	2	2	3	4	4	1	1	3	4	1	1	1
1	3	3	2	7	2	0	0	1	0	0	1	0	0	1	0	0	1	0	0	1	0	0	1	0	0	1	4	3	5	2	2	5	5	2	4	5	2	2	5	3	3	2	1
1	2	2	1		2	0	0	1	0	0	1	0	0	1	0	0	1	0	0	1	0	0	1	0	0	1	4	4	4	2	5	4	3	1	3	5	4	2	4	4	2	2	2
2	2	2	3	1	2	0	0	1	0	0	1	0	0	1	0	0	1	0	0	1	0	0	1	0	0	1	4	1	6	1	3	6	3	3	2	2	1	1	1	1	1	1	1
2	2	2	2	1	2	0	0	1	0	0	1	0	0	1	0	0	1	0	0	1	0	0	1	0	0	1	4	3	3	4	5	5	3	4	4	5	5	1	4	4	1	1	1
3	3	1	1	1	1	0	0	1	0	0	1	0	0	1	0	0	1	0	0	1	0	0	1	0	0	1	4	2	3	2	5	2	2	2	3	4	4	2	2	3	2	1	1
2	2	2	4	1	2	0	0	1	0	0	1	0	0	1	0	0	1	0	0	1	0	0	1	0	0	1	3	4	4	4	5	5	5	2	5	3	2	1	3	3	3	3	5
1	2	2	2	1	2	0	0	1	0	0	1	0	0	1	0	0	1	0	0	1	0	0	1	0	0	1	4	3	3	3	3	4	3	3	3	4	4	1	3	3	1	1	2
2	1	2	2	1	2	0	0	1	0	0	1	0	0	1	0	0	1	0	0	1	0	0	1	0	0	1	4	4	4	4	5	4	3	2	2	2	2	5	3	3	5	5	1
2	2	2	2	1	1	0	0	1	0	0	1	0	0	1	0	0	1	0	0	1	0	0	1	0	0	1	4	6	6	6	6	6	6	6	6	5	5	2	3	4	1	1	1
2	2	2	2	4	2	0	0	1	0	0	1	0	0	1	0	0	1	0	0	1	0	0	1	0	0	1	4	2	2	2	3	4	3	2	4	2	2	3	2	2	1	1	2
3	3	3	4		2	0	0	1	0	0	1	0	0	1	0	0	1	0	0	1	0	0	1	0	0	1	4	2	2	3	6	3	1	1	1	4	3	1	1	2	1	1	1
3	3	3	2		2	0	0	1	0	0	1	0	0	1	0	0	1	0	0	1	0	0	1	0	0	1	4	5	4	3	5	6	4	3	4	5	5	1	4	4	1	1	1
2	2	2	1	6	2	0	0	1	0	0	1	0	0	1	0	0	1	0	0	1	0	0	1	0	0	1	4	1	1	1	5	1	5	1	2	3	4	1	2	1	1	1	2
2	2	2	4	1	2	0	0	1	0	0	1	0	0	1	0	0	1	0	0	1	0	0	1	0	0	1	4	4	2	1	3	1	2	2	2	3	4	4	3	2	2	1	8	0	0	0	0	0	0
3	1	2	2	1	2	0	0	1	0	0	1	0	0	1	0	0	1	0	0	1	0	0	1	0	0	1	4	3	3	3	4	3	3	3	3	4	4	2	4	4	3	3	3
2	2	2	1	4	2	0	0	1	0	0	1	0	0	1	0	0	1	0	0	1	0	0	1	0	0	1	4	1	1	1	3	4	1	1	6	4	4	1	2	2	2	1	1
2	2	2	2	1	2	0	0	1	0	0	1	0	0	1	0	0	1	0	0	1	0	0	1	0	0	1	4	3	4	3	5	3	4	2	3	3	2	2	2	2	2	2	1
3	3	3	1	1	2	0	0	1	0	0	1	0	0	1	0	0	1	0	0	1	0	0	1	0	0	1	4	1	3	6	5	3	3	3	2	4	4	4	4	4	3	2	1
3	3	3	2		2	0	0	1	0	0	1	0	0	1	0	0	1	0	0	1	0	0	1	0	0	1	4	3	4	2	6	3	3	3	4	4	4	2	2	4	3	3	2
2	2	2	2	1	2	0	0	1	0	0	1	0	0	1	0	0	1	0	0	1	0	0	1	0	0	1	3	3	3	3	3	4	3	3	3	5	5	5	5	5	4	4	1
1	2	1	3	1	2	0	0	1	0	0	1	0	0	1	0	0	1	0	0	1	0	0	1	0	0	1	2	3	4	4	4	4	4	4	5	2	4	2	1	3	2	2	8	0	0	1	0	0	0
1	2	2	2	1	2	0	0	1	0	0	1	0	0	1	0	0	1	0	0	1	0	0	1	0	0	1	3	3	4	3	5	3	4	3	4	4	4	2	5	4	3	2	8	0	1	0	0	1	1
2	2	2	1		2	0	0	1	0	0	1	0	0	1	0	0	1	0	0	1	0	0	1	0	0	1	3	3	3	3	3	3	3	3	3	4	4	1	1	3	1	1	7	0	0	0	0	0	1
2	2	2	2	7	2	0	0	1	0	0	1	0	0	1	0	0	1	0	0	1	0	0	1	0	0	1	3	4	3	3	5	3	3	4	3	3	3	2	3	2	4	3	8	0	0	0	0	0	0
2	2	2	2	1	2	0	0	1	0	0	1	0	0	1	0	0	1	0	0	1	0	0	1	0	0	1	4	4	5	4	5	5	4	4	5	4	4	1	3	2	1	1	2
1	2	2	1	1	2	0	0	1	0	0	1	0	0	1	0	0	1	0	0	1	0	0	1	0	0	1	4	3	3	3	4	4	3	3	3	4	4	2	3	2	2	2	2
2	2	2	4	1	2	0	0	1	0	0	1	0	0	1	0	0	1	0	0	1	0	0	1	0	0	1	4	4	5	4	4	3	4	4	5	4	3	3	3	3	3	3	7	0	0	0	0	0	0
2	2	2	2	6	2	0	0	1	0	0	1	0	0	1	0	0	1	0	0	1	0	0	1	0	0	1	4	1	1	1	3	4	3	2	2	3	3	1	5	1	1	1	1
2	2	2	3	1	2	0	0	1	0	0	1	0	0	1	0	0	1	0	0	1	0	0	1	0	0	1	4	3	3	3	6	6	3	1	3	2	4	1	1	1	1	1	6
2	2	2	3	1	2	0	0	1	0	0	1	0	0	1	0	0	1	0	0	1	0	0	1	0	0	1	4	2	2	2	4	3	4	2	2	3	4	2	3	2	2	2	1
2	2	2	3	1	2	0	0	1	0	0	1	0	0	1	0	0	1	0	1	0	0	0	1	0	0	1	4	6	5	5	6	6	6	6	6	1	1	1	1	1	1	1	2
1	2	2	3	1	2	0	0	1	0	0	1	0	0	1	0	0	1	0	0	1	0	0	1	0	0	1	4	3	3	2	4	4	3	3	4	4	5	1	2	2	2	1	1
1	1	3	2	1	2	0	0	1	0	0	1	0	0	1	0	0	1	0	0	1	0	0	1	0	0	1	4	6	6	1	6	6	3	3	1	1	5	1	1	1	1	1	1
2	2	2	3	7	2	0	0	1	0	0	1	0	0	1	0	0	1	0	0	1	0	0	1	0	0	1	4	3	3	3	3	3	3	3	3	3	3	3	3	3	3	3	1
2	2	2	3	1	2	0	0	1	0	0	1	0	0	1	0	0	1	0	0	1	0	0	1	0	0	1	4	4	4	4	6	2	2	2	2	4	3	1	2	4	1	1	1
2	2	1	3	4	2	0	0	1	0	0	1	0	0	1	0	0	1	0	0	1	0	0	1	0	0	1	4	4	3	2	3	1	4	3	2	3	4	2	2	1	2	2	1
2	2	2	2	1	1	0	0	1	0	0	1	0	0	1	0	0	1	0	0	1	0	0	1	0	0	1	4	3	2	4	3	3	4	4	3	3	4	2	2	3	2	2	1
2	2	2	1	1	2	0	0	1	0	0	1	0	0	1	0	0	1	0	0	1	0	0	1	0	0	1	4	3	4	3	5	3	4	3	5	4	2	1	3	3	1	1	1
2	2	2	2	1	2	0	0	1	0	0	1	0	0	1	0	0	1	0	0	1	0	0	1	0	0	1	4	2	4	3	4	4	4	3	4	4	4	4	4	4	4	4	1
2	2	2	2	1	2	0	0	1	0	0	1	0	0	1	0	0	1	0	0	1	0	0	1	0	0	1	3	2	3	3	5	2	2	4	4	3	4	1	3	4	2	2	8	0	0	0	1	0	0
2	2	2	2	2	2	0	0	1	0	0	1	0	0	1	0	0	1	0	0	1	0	0	1	0	0	1	4	5	4	4	5	5	4	4	4	4	3	3	4	4	4	4	1
2	2	2	2	1	2	0	0	1	0	0	1	0	0	1	0	0	1	0	0	1	0	0	1	0	0	1	4	4	4	3	4	4	4	4	4	4	4	1	1	1	1	1	1
3	3	3	1	1	2	0	0	1	0	0	1	0	0	1	0	0	1	0	0	1	0	0	1	0	0	1	4	5	4	4	4	2	2	2	2	2	2	2	2	2	2	2	1
1	3	3	1	5	2	0	0	1	0	0	1	0	0	1	0	0	1	0	0	1	0	0	1	0	0	1	4	3	3	3	3	3	1	1	2	4	4	1	1	3	1	1	2
1	1	2	3	2	2	0	0	1	0	0	1	0	0	1	0	0	1	0	0	1	0	0	1	0	0	1	4	4	6	4	4	4	5	5	5	4	4	3	4	4	2	1	2
1	2	2	2	1	2	0	0	1	0	0	1	0	0	1	0	0	1	0	0	1	0	0	1	0	0	1	4	4	4	4	4	3	5	6	6	5	5	5	5	5	5	5	1
2	2	2	3	1	2	0	0	1	0	0	1	0	0	1	0	0	1	0	0	1	0	0	1	0	0	1	4	6	2	4	4	5	5	5	4	3	2	1	4	4	4	5	7	0	0	0	0	0	1
2	2	2	2	1	2	0	0	1	0	0	1	0	0	1	0	0	1	0	0	1	0	0	1	0	0	1	4	4	4	4	3	4	1	1	1	4	2	2	3	3	1	1	8	0	0	0	0	0	1
2	2	1	2	6	2	0	0	1	0	0	1	0	0	1	0	0	1	0	0	1	0	0	1	0	0	1	4	1	1	1	1	1	1	1	1	2	1	2	1	1	1	1	1
2	2	2	3	1	2	0	0	1	0	0	1	0	0	1	0	0	1	0	0	1	0	0	1	0	0	1	4	2	2	2	2	2	3	4	4	3	3	3	3	3	2	2	1
2	2	2	3	5	2	0	0	1	0	0	1	0	0	1	0	0	1	0	0	1	0	0	1	0	0	1	4	4	4	3	5	5	5	2	3	3	3	2	2	4	1	1	7	0	1	0	1	1	1
2	2	2	2	1	2	0	0	1	0	0	1	0	0	1	0	0	1	0	0	1	0	0	1	0	0	1	4	1	1	1	1	1	1	1	1	3	3	3	3	3	3	3	1
3	3	3	1	1	2	0	0	1	0	0	1	0	0	1	0	0	1	0	0	1	0	0	1	0	0	1	4	1	4	1	3	3	1	1	1	4	4	1	2	3	1	1	6
2	2	2	1	1	2	0	0	1	0	0	1	0	0	1	0	0	1	0	0	1	0	0	1	0	0	1	4	4	4	3	5	5	4	3	3	4	4	1	2	3	1	1	7	0	1	0	0	0	0
2	2	2	3	6	2	0	0	1	0	0	1	0	0	1	0	0	1	0	0	1	0	0	1	0	0	1	4	3	3	3	3	3	3	3	3	3	3	3	3	3	3	3	1
2	2	2	2	1	2	0	0	1	0	0	1	0	0	1	0	0	1	0	0	1	0	0	1	0	0	1	4	3	4	1	6	5	4	3	2	4	4	1	2	1	1	1	2
1	2	3	3	1	2	0	0	1	0	0	1	0	0	1	0	0	1	0	0	1	0	0	1	0	0	1	4	5	5	5	5	3	4	4	4	5	4	3	4	5	4	4	1
1	3	3	1	1	2	0	0	1	0	0	1	0	0	1	0	0	1	0	0	1	0	0	1	0	0	1	2	6	3	2	4	4	2	3	4	4	4	1	4	4	1	1	2
1	1	2	1	1	2	1	0	0	0	0	1	0	0	1	0	0	1	0	0	1	0	0	1	0	0	1	4	3	4	4	5	4	4	1	4	3	5	1	4	3	1	2	8	0	0	0	0	0	0
2	2	2	2	1	2	0	0	1	0	0	1	0	0	1	0	0	1	0	0	1	0	0	1	0	0	1	4	4	4	3	3	5	2	4	4	3	3	1	2	2	1	1	1
1	3	3	2	3	2	0	0	1	0	0	1	0	0	1	0	0	1	0	0	1	0	0	1	0	0	1	4	1	1	1	1	5	1	5	6	2	2	1	1	2	1	1	1
2	2	2	2	1	2	0	0	1	0	0	1	0	0	1	0	0	1	0	0	1	0	0	1	0	0	1	4	3	3	3	3	4	3	3	3	4	2	1	1	1	1	1	1
2	2	2	3	1	2	0	0	1	0	0	1	0	0	1	0	0	1	0	0	1	0	0	1	0	0	1	4	3	4	3	4	5	3	4	3	3	3	2	3	3	2	2	1
2	2	2	3	7	1	0	0	1	0	0	1	0	0	1	0	0	1	0	0	1	0	0	1	0	0	1	4	2	4	3	3	6	2	4	4	1	1	1	1	1	1	1	1
2	2	2	2	1	2	0	0	1	0	0	1	0	0	1	0	0	1	0	0	1	0	0	1	0	0	1	4	4	5	3	5	4	4	4	6	4	4	2	4	4	2	2	1
2	2	2	3	1	2	0	0	1	0	0	1	0	0	1	0	0	1	0	0	1	0	0	1	0	0	1	4	5	4	4	6	6	6	4	3	5	3	2	4	2	3	2	1
1	1	2	1	1	2	0	0	1	0	0	1	0	0	1	0	0	1	0	0	1	0	0	1	0	0	1	4	3	4	1	1	2	2	2	5	2	4	1	1	4	1	1	1
1	2	2	2	2	2	0	0	1	0	0	1	0	0	1	0	0	1	0	0	1	0	0	1	0	0	1	1	6	6	6	6	6	6	6	6	5	5	5	5	5	5	5	1
2	2	2	1	1	2	0	0	1	0	0	1	0	0	1	0	0	1	0	0	1	0	0	1	0	0	1	4	2	4	1	6	3	3	3	3	2	4	2	2	2	2	2	5
1	2	2	2	1	2	0	0	1	0	0	1	0	0	1	0	0	1	0	0	1	0	0	1	0	0	1	4	4	3	3	3	4	4	3	3	4	4	2	4	4	2	2	1
1	2	2	1	1	2	0	0	1	0	0	1	0	0	1	0	0	1	0	0	1	0	0	1	0	0	1	4	2	2	1	2	2	2	1	1	3	3	1	3	2	1	1	1
3	3	3	2		2	0	0	1	0	0	1	0	0	1	0	0	1	1	0	0	0	0	1	0	0	1	4	3	3	1	6	6	4	5	6	5	5	1	5	5	1	3	6
3	3	3	3		2	0	0	1	0	0	1	0	0	1	0	0	1	0	0	1	0	0	1	0	0	1	4	3	4	3	5	4	3	2	3	4	4	1	3	3	1	1	1
2	2	2	2	1	2	0	0	1	0	0	1	0	0	1	0	0	1	0	0	1	0	0	1	0	0	1	4	5	5	5	5	5	5	3	3	3	3	3	3	3	3	3	2
3	3	3	3		2	0	0	1	0	0	1	0	0	1	0	0	1	0	0	1	0	0	1	0	0	1	4	2	3	2	5	3	2	1	1	4	3	1	4	2	1	1	2
2	2	2	2	1	2	0	0	1	0	0	1	0	0	1	0	0	1	0	0	1	0	0	1	0	0	1	4	3	5	3	3	5	4	3	4	1	1	1	1	1	1	1	7	1	1	1	0	0	1
2	2	2	2	1	2	0	0	1	0	0	1	0	0	1	0	0	1	0	0	1	0	0	1	0	0	1	4	3	3	3	4	4	5	2	2	4	4	2	5	2	1	1	2
2	2	2	1	7	2	0	0	1	0	0	1	0	0	1	0	0	1	0	0	1	0	0	1	0	0	1	4	1	2	1	4	2	2	2	3	4	2	1	3	1	1	1	1
2	2	2	3	1	2	0	0	1	0	0	1	0	0	1	0	0	1	0	0	1	0	0	1	0	0	1	4	1	1	1	1	1	1	1	1	4	4	1	4	3	1	1	2
2	2	2	2	1	2	0	0	1	0	0	1	0	0	1	0	0	1	0	0	1	0	0	1	0	0	1	4	3	4	3	4	4	3	4	4	4	3	3	4	2	3	3	2
2	2	2	3	1	2	0	0	1	0	0	1	0	0	1	0	0	1	0	0	1	0	0	1	0	0	1	4	4	4	4	4	3	3	3	4	4	4	4	4	3	3	3	2
2	2	2	1	1	2	0	0	1	0	0	1	0	0	1	0	0	1	0	0	1	0	0	1	0	0	1	4	3	4	3	6	3	3	3	4	3	3	1	2	2	1	1	1
1	2	2	2	1	2	0	0	1	0	0	1	0	0	1	0	0	1	0	0	1	0	0	1	0	0	1	4	3	4	3	3	4	3	3	3	3	3	3	3	3	3	3	1
2	1	2	2	1	2	0	0	1	0	0	1	0	0	1	0	0	1	0	0	1	0	0	1	0	0	1	4	1	3	1	2	3	5	3	4	4	4	2	2	3	2	2	1
2	2	2	1	1	2	0	0	1	0	0	1	0	0	1	0	0	1	0	0	1	0	0	1	0	0	1	4	2	2	2	6	6	2	1	6	4	2	2	2	2	2	2	1
3	3	3	1		2	0	0	1	0	0	1	0	0	1	0	0	1	0	0	1	0	0	1	0	0	1	4	1	1	1	4	4	4	1	1	4	5	1	4	4	1	1	8	0	1	1	0	1	1
2	2	1	2	3	2	0	1	0	0	1	0	0	0	1	0	1	0	1	0	0	0	0	1	0	1	0	1	4	2	3	4	3	3	5	2	1	3	3	3	2	4	1	3
2	2	2	1	6	2	1	0	0	0	0	1	0	0	1	0	0	1	1	0	0	0	0	1	0	0	1	4	3	3	1	4	4	4	4	4	3	5	1	3	1	1	1	1
2	2	2	3	1	2	0	0	1	0	0	1	0	0	1	0	0	1	0	0	1	0	0	1	0	0	1	4	4	4	4	4	4	4	4	4	4	4	4	4	4	4	4	1
1	2	2	2	1	1	0	0	1	0	0	1	0	0	1	0	0	1	0	0	1	0	0	1	0	0	1	2	3	3	3	3	3	2	3	3	5	5	2	5	4	4	4	2
1	2	2	2	1	2	0	0	1	0	0	1	0	0	1	0	0	1	0	0	1	0	0	1	0	0	1	4	2	2	2	6	3	3	2	4	4	3	2	3	2	1	1	1
2	2	2	1	7	2	0	0	1	0	0	1	0	0	1	0	0	1	0	0	1	0	0	1	0	0	1	4	4	4	3	4	4	3	3	4	3	2	2	2	2	2	2	1
3	3	3	2	1	2	0	0	1	0	0	1	0	0	1	0	0	1	0	0	1	0	0	1	0	0	1	4	3	3	2	3	3	2	3	3	3	3	3	3	3	2	3	2
2	2	2	3	1	2	0	0	1	0	0	1	0	0	1	0	0	1	0	0	1	0	0	1	0	0	1	4	3	4	3	2	3	3	3	3	5	5	1	5	3	2	2	1
1	2	2	3	1	2	0	0	1	0	0	1	0	0	1	0	0	1	0	0	1	0	0	1	0	0	1	4	1	4	1	3	6	1	1	4	3	4	1	2	3	1	1	1
2	2	2	2	1	2	0	0	1	0	0	1	0	0	1	0	0	1	0	0	1	0	0	1	0	0	1	4	2	3	3	3	4	3	2	2	5	4	3	4	4	4	2	1
2	2	2	2	1	2	0	0	1	0	0	1	0	0	1	0	0	1	0	0	1	0	0	1	0	0	1	4	3	3	3	3	3	3	3	3	4	4	2	3	3	3	3	1
1	2	2	1	2	2	0	0	1	0	0	1	0	0	1	0	0	1	0	0	1	0	0	1	0	0	1	4	6	6	6	6	6	6	6	6	5	5	1	4	4	4	1	1
2	2	2	2	7	2	0	0	1	0	0	1	0	0	1	0	0	1	0	0	1	0	0	1	0	0	1	4	3	3	3	3	3	3	3	3	4	4	1	4	2	4	1	7	1	1	0	0	0	0
2	2	2	2	1	2	0	0	1	0	0	1	0	0	1	0	0	1	0	0	1	0	0	1	0	0	1	4	4	3	3	4	1	5	1	4	5	5	1	5	4	1	1	8	0	1	0	1	1	1
2	2	2	2		2	0	0	1	0	0	1	0	0	1	0	0	1	0	0	1	0	0	1	0	0	1	4	2	2	2	2	2	2	2	2	5	3	2	4	3	2	2	6
2	2	2	2	7	2	0	0	1	0	0	1	0	0	1	0	0	1	0	0	1	0	0	1	0	0	1	4	6	4	4	4	5	5	5	5	4	3	1	2	3	3	3	1
2	2	2	1	1	2	0	0	1	0	0	1	0	0	1	0	0	1	0	0	1	0	0	1	0	0	1	4	4	4	2	6	6	4	4	4	4	4	1	3	4	1	1	1
1	2	2	1	5	2	0	0	1	0	0	1	0	0	1	0	0	1	0	0	1	0	0	1	0	0	1	4	4	4	5	6	5	3	3	3	4	4	1	3	4	1	1	7	0	1	1	0	1	0
2	2	2	3	1	2	0	0	1	0	0	1	0	0	1	0	0	1	0	0	1	0	0	1	0	0	1	4	4	4	4	2	4	2	4	2	2	3	3	2	3	2	3	1
2	2	2	3	7	2	0	0	1	0	0	1	0	0	1	0	0	1	0	0	1	0	0	1	0	0	1	4	4	4	3	4	4	3	3	4	5	5	2	5	5	5	5	5
2	2	2	2	1	2	0	0	1	0	0	1	0	0	1	0	0	1	0	0	1	0	0	1	0	0	1	4	4	4	6	4	3	4	4	3	3	4	2	3	3	3	3	1
2	2	2	1	1	2	0	0	1	0	0	1	0	0	1	0	0	1	0	0	1	0	0	1	0	0	1	4	3	3	3	3	3	3	3	3	4	4	3	4	3	2	2	1
2	2	2	2		2	0	0	1	0	0	1	0	0	1	0	0	1	0	0	1	0	0	1	0	0	1	4	3	3	1	3	3	1	1	1	3	3	1	3	2	2	2	1
2	2	2	3	1	1	0	0	1	0	0	1	0	0	1	0	0	1	0	0	1	0	0	1	0	0	1	4	4	5	3	4	2	3	3	3	5	4	4	4	3	1	1	1
2	2	2	2		2	0	0	1	0	0	1	0	0	1	0	0	1	0	0	1	0	0	1	0	0	1	4	4	4	4	5	6	5	3	4	4	4	1	1	1	1	1	7	0	0	0	0	0	0
3	3	3	3		2	0	0	1	0	0	1	0	0	1	0	0	1	0	0	1	0	0	1	0	0	1	4	3	3	3	3	3	3	3	3	4	5	1	2	1	1	1	1
2	2	2	2	4	2	0	0	1	0	0	1	0	0	1	0	0	1	0	0	1	0	0	1	0	0	1	4	3	3	3	5	6	3	1	2	4	5	1	2	3	1	1	2
2	2	2	2	4	2	0	0	1	0	0	1	0	0	1	0	0	1	0	0	1	0	0	1	0	0	1	4	5	5	1	5	5	2	5	5	3	4	1	1	1	1	1	1
2	2	2	1	1	2	0	0	1	0	0	1	0	0	1	0	0	1	0	0	1	0	0	1	0	0	1	4	1	1	1	4	2	2	2	2	4	4	1	3	2	1	1	1
2	2	2	2	5	2	0	0	1	0	0	1	0	0	1	0	0	1	0	0	1	0	0	1	0	0	1	4	5	4	3	3	4	3	3	3	5	3	3	4	3	3	3	6
2	2	2	2	1	2	0	0	1	0	0	1	0	0	1	0	0	1	0	0	1	0	0	1	0	0	1	4	3	5	3	3	4	5	1	4	4	4	1	3	1	1	1	1
1	1	1	1		2	0	0	1	0	0	1	0	0	1	0	0	1	0	0	1	0	0	1	0	0	1	4	2	3	2	5	6	4	3	3	4	5	3	4	5	3	3	1
1	2	2	1	3	1	0	0	1	0	0	1	0	0	1	0	0	1	0	0	1	0	0	1	0	0	1	4	2	4	3	4	4	3	2	4	3	4	1	3	2	1	1	2
3	3	3	2		2	0	0	1	0	0	1	0	0	1	0	0	1	0	0	1	0	0	1	0	0	1	4	4	4	4	4	4	3	3	3	4	4	2	4	3	2	3	2
2	2	2	3	5	2	0	0	1	0	0	1	0	0	1	0	0	1	0	0	1	0	0	1	0	0	1	4	4	4	4	4	4	4	4	4	4	4	4	4	4	3	3	1
3	3	3	1		2	0	0	1	0	0	1	0	0	1	0	0	1	0	0	1	0	0	1	0	0	1	4	4	3	3	3	4	3	3	3	5	5	2	4	4	2	3	1
3	3	3	2	1	1	0	0	1	0	0	1	0	0	1	0	0	1	0	0	1	0	0	1	0	0	1	4	3	4	2	5	6	4	3	6	5	5	2	4	2	3	3	2
2	2	2	4	1	2	0	0	1	0	0	1	0	0	1	0	0	1	0	0	1	0	0	1	0	0	1	4	2	2	2	2	2	2	2	2	4	4	2	2	4	2	2	1
2	2	2	2	5	2	0	0	1	0	0	1	0	0	1	0	0	1	0	0	1	0	0	1	0	0	1	4	2	3	2	5	3	3	3	2	4	4	2	2	2	1	1	1
2	3	2	4	1	2	0	0	1	0	0	1	0	0	1	0	0	1	0	0	1	0	0	1	0	0	1	4	1	1	1	1	1	1	1	1	4	4	1	1	1	1	1	1
2	2	2	2	1	2	0	0	1	0	0	1	0	0	1	0	0	1	0	0	1	0	0	1	0	0	1	4	2	2	2	3	3	3	1	1	5	3	3	5	4	3	3	1
3	3	3	2		2	0	0	1	0	0	1	0	0	1	0	0	1	0	0	1	0	0	1	0	0	1	4	4	4	3	3	3	3	2	2	4	4	1	4	4	1	1	6
1	3	3	3	7	1	0	0	1	0	0	1	0	0	1	0	0	1	0	0	1	0	0	1	0	0	1	4	4	2	3	4	3	4	3	4	2	3	2	4	3	2	3	1
2	2	2	2		2	0	0	1	0	0	1	0	0	1	0	0	1	0	0	1	0	0	1	0	0	1	4	3	3	3	4	3	3	3	3	4	4	2	3	3	1	1	1
3	3	3	1	1	2	0	0	1	0	0	1	0	0	1	0	0	1	0	0	1	0	0	1	0	0	1	4	2	3	1	4	2	4	1	3	5	4	2	4	2	1	1	2
1	3	1	2	3	2	0	0	1	0	0	1	0	0	1	0	0	1	0	0	1	0	0	1	0	0	1	4	3	3	4	4	6	4	4	2	4	4	2	3	2	2	2	1
2	2	2	1	1	2	0	0	1	0	0	1	0	0	1	0	0	1	0	0	1	0	0	1	0	0	1	4	2	3	3	5	4	3	3	3	3	4	1	1	1	1	1	1
3	3	3	3		2	0	0	1	0	0	1	0	0	1	0	0	1	0	0	1	0	0	1	0	0	1	4	3	3	3	3	4	3	3	3	5	5	2	3	3	2	2	1
1	3	3	3	1	2	0	0	1	0	0	1	0	0	1	0	0	1	0	0	1	0	0	1	0	0	1	4	4	3	3	3	4	3	3	3	3	3	1	1	1	1	1	1
2	2	2	3	1	2	0	0	1	0	0	1	0	0	1	0	0	1	0	0	1	0	0	1	0	0	1	4	2	3	3	3	2	3	3	3	4	3	3	4	4	4	3	1
2	2	2	1	1	2	0	0	1	0	0	1	0	0	1	0	0	1	0	0	1	0	0	1	0	0	1	4	3	5	3	6	6	4	2	4	4	4	1	4	2	1	1	1
2	2	2	1	1	2	0	0	1	0	0	1	0	0	1	0	0	1	0	0	1	0	0	1	0	0	1	4	1	2	3	5	4	3	3	1	4	4	2	3	3	2	2	1
2	2	2	2	1	2	0	0	1	0	0	1	0	0	1	0	0	1	0	0	1	0	0	1	0	0	1	4	4	4	4	4	4	4	2	3	4	3	3	3	3	3	3	1
2	2	1	2	1	1	0	0	1	0	0	1	0	0	1	0	0	1	0	0	1	0	0	1	0	0	1	4	4	5	4	6	4	4	3	4	4	2	1	4	1	1	1	6
2	3	3	3	5	2	0	0	1	0	0	1	0	0	1	0	0	1	0	0	1	0	0	1	0	0	1	4	3	3	5	3	2	3	2	1	2	3	2	3	2	3	3	1
2	2	2	3	1	2	0	0	1	0	0	1	0	0	1	0	0	1	0	0	1	0	0	1	0	0	1	4	3	3	3	3	3	3	3	3	3	3	3	3	3	3	3	7	0	0	0	0	0	0
1	2	2	2	1	2	0	0	1	0	0	1	0	0	1	0	0	1	0	0	1	0	0	1	0	0	1	4	4	4	4	6	6	3	3	3	4	5	3	3	4	2	2	1
3	3	3	3		2	0	0	1	0	0	1	0	0	1	0	0	1	0	0	1	0	0	1	0	0	1	4	3	5	4	4	3	4	2	3	5	5	2	4	4	3	4	1
2	2	2	3	2	2	0	0	1	0	0	1	0	0	1	0	0	1	0	0	1	0	0	1	0	0	1	4	4	4	4	4	5	4	3	3	3	3	2	2	2	2	2	1
3	3	3	3		2	0	0	1	0	0	1	0	0	1	0	0	1	0	0	1	0	0	1	0	0	1	4	3	4	3	4	3	3	2	2	2	1	1	1	2	1	1	1
1	3	3	2	1	2	0	0	1	0	0	1	0	0	1	0	0	1	0	0	1	0	0	1	0	0	1	4	3	4	3	4	5	3	3	5	4	4	2	4	2	3	2	1
3	3	3	2		1	0	0	1	0	0	1	0	0	1	0	0	1	0	0	1	0	0	1	0	0	1	4	1	1	1	1	5	4	2	3	4	4	1	2	2	1	1	6
2	2	2	2	3	2	0	0	1	0	0	1	0	0	1	0	0	1	0	0	1	0	0	1	0	0	1	4	3	3	2	2	3	3	2	2	4	4	2	4	2	1	1	1
2	2	2	3	1	2	0	0	1	0	0	1	0	0	1	0	0	1	0	0	1	0	0	1	0	0	1	4	3	4	3	4	4	3	3	3	4	4	3	3	3	3	3	1
3	3	1	3		2	0	0	1	0	0	1	0	0	1	0	0	1	0	0	1	0	0	1	0	0	1	4	2	2	3	2	3	2	2	3	4	3	3	4	4	4	4	1
2	2	2	2	1	2	0	0	1	0	0	1	0	0	1	0	0	1	0	0	1	0	0	1	0	0	1	4	4	4	4	5	4	5	3	4	4	3	3	4	2	2	2	1
1	2	2	4	7	2	0	0	1	0	0	1	0	0	1	0	0	1	0	0	1	0	0	1	0	0	1	4	4	4	4	4	2	3	3	3	2	2	1	1	1	1	1	1
3	3	3	1		2	0	0	1	0	0	1	0	0	1	0	0	1	0	0	1	0	0	1	0	0	1	3	3	4	4	4	5	3	4	3	4	4	2	2	2	1	1	7	1	0	0	0	0	0
2	2	2	1	1	1	0	0	1	0	0	1	0	0	1	0	0	1	0	0	1	0	0	1	0	0	1	4	3	3	3	3	6	4	1	1	4	2	1	4	2	1	1	6
3	3	3	2		2	0	0	1	0	0	1	0	0	1	0	0	1	0	0	1	0	0	1	0	0	1	4	4	5	5	6	3	6	4	5	5	5	1	4	5	1	1	1
2	2	2	2	1	2	0	0	1	0	0	1	0	0	1	0	0	1	0	0	1	0	0	1	0	0	1	4	3	4	3	4	4	3	4	3	2	4	1	1	3	1	1	1
1	2	2	2	1	2	0	0	1	0	0	1	0	0	1	0	0	1	0	0	1	0	0	1	0	0	1	4	1	6	1	6	6	1	1	4	5	5	3	5	5	3	3	1
2	2	2	2	1	2	0	0	1	0	0	1	0	0	1	0	0	1	0	0	1	0	0	1	0	0	1	4	4	4	4	4	3	4	3	3	4	4	4	5	4	4	4	1
2	2	2	2	7	2	0	0	1	0	0	1	0	0	1	0	0	1	0	0	1	0	0	1	0	0	1	4	2	3	2	3	4	3	2	3	2	3	2	4	4	2	2	1
2	2	2	2	1	2	0	0	1	0	0	1	0	0	1	0	0	1	0	0	1	0	0	1	0	0	1	4	4	4	3	4	5	3	3	3	3	3	1	3	3	3	3	8	0	1	0	0	0	0
2	2	2	1	1	2	0	0	1	0	0	1	0	0	1	0	0	1	0	0	1	0	0	1	0	0	1	4	3	6	1	4	5	5	1	2	3	2	1	2	2	1	1	7	0	0	0	1	0	0
1	1	2	1	1	2	0	0	1	0	0	1	0	0	1	0	0	1	0	0	1	0	0	1	0	0	1	4	2	3	2	4	5	3	5	4	5	4	3	4	4	3	1	1
3	3	3	2	3	2	0	0	1	0	0	1	0	0	1	0	0	1	0	0	1	0	0	1	0	0	1	4	2	2	2	2	4	4	2	4	3	3	1	4	3	1	1	1
3	3	3	1	1	2	0	0	1	0	0	1	0	0	1	0	0	1	0	0	1	0	0	1	0	0	1	4	4	4	4	4	4	4	4	4	5	5	1	5	5	1	1	1
3	3	2	4	1	2	0	0	1	0	0	1	0	0	1	0	0	1	0	0	1	0	0	1	0	0	1	4	3	3	3	3	3	4	2	4	3	3	3	3	3	3	3	1
3	3	3	2	1	2	0	0	1	0	0	1	0	0	1	0	0	1	0	0	1	0	0	1	0	0	1	4	2	3	2	3	4	4	3	3	3	3	2	3	2	2	2	1
2	3	3	4	1	2	0	0	1	0	0	1	0	0	1	0	0	1	0	0	1	0	0	1	0	0	1	4	4	4	4	4	4	4	4	5	5	5	3	4	5	3	3	2
2	2	1	1	4	2	0	0	1	0	0	1	0	0	1	0	0	1	0	0	1	0	0	1	0	0	1	4	3	3	3	5	5	3	3	3	3	3	3	3	3	3	3	1
2	2	2	3	1	2	0	0	1	0	0	1	0	0	1	0	0	1	0	0	1	0	0	1	0	0	1	3	2	4	2	4	4	6	3	5	3	3	3	3	3	3	3	7	0	1	0	0	0	1
2	2	2	2	1	2	0	0	1	0	0	1	0	0	1	0	0	1	0	0	1	0	0	1	0	0	1	4	4	4	6	5	5	6	6	6	3	3	3	3	3	3	3	1
2	2	2	1	1	2	0	0	1	0	0	1	0	0	1	0	0	1	0	0	1	0	0	1	0	0	1	4	3	5	3	3	2	2	3	3	4	4	2	4	4	2	2	1
3	3	3	1	6	2	0	0	1	0	0	1	0	0	1	0	0	1	0	0	1	0	0	1	0	0	1	4	4	4	3	4	4	4	3	3	5	4	1	3	3	1	1	1
2	1	2	3	1	2	0	0	1	0	0	1	0	0	1	0	0	1	0	0	1	0	0	1	0	0	1	3	3	3	3	2	2	3	3	3	2	2	1	2	2	1	1	1
3	3	3	1		2	0	0	1	0	0	1	0	0	1	0	0	1	0	0	1	0	0	1	0	0	1	4	2	2	1	3	5	2	1	1	3	3	1	3	1	1	1	1
1	1	2	3	5	1	1	0	0	0	0	1	1	0	0	1	0	0	1	0	0	0	0	1	1	0	0	1	4	4	4	4	4	4	4	4	4	5	4	4	4	4	4	1
2	2	2	1	4	2	0	0	1	0	0	1	0	0	1	0	0	1	0	0	1	0	0	1	0	0	1	2	4	3	1	5	5	5	3	3	2	1	1	2	1	1	2	7	1	1	0	0	0	0
1	1	2	2	1	2	0	0	1	0	0	1	0	0	1	0	0	1	0	0	1	0	0	1	0	0	1	4	3	3	3	3	3	3	3	3	3	3	3	3	3	3	3	1
1	3	3	2	1	2	0	0	1	0	0	1	0	0	1	0	0	1	0	0	1	0	0	1	0	0	1	2	1	1	1	6	6	1	1	6	1	1	1	1	1	1	1	1
1	2	2	2	3	2	0	0	1	0	0	1	0	0	1	0	0	1	0	0	1	0	0	1	0	0	1	4	3	4	3	4	4	4	3	3	4	4	3	4	3	3	3	1
2	2	2	3	5	2	0	0	1	0	0	1	0	0	1	0	0	1	0	0	1	0	0	1	0	0	1	4	4	4	4	5	4	4	4	4	3	3	3	3	3	3	3	1
1	2	2	1	1	2	0	0	1	0	0	1	0	0	1	0	0	1	0	0	1	0	0	1	0	0	1	4	4	5	4	5	6	3	4	2	4	4	1	1	2	1	1	8	0	0	0	0	0	0
2	2	2	1	1	2	0	0	1	0	0	1	0	0	1	0	0	1	0	0	1	0	0	1	0	0	1	4	1	3	2	5	6	2	6	3	2	3	1	1	1	1	1	1
3	2	2	2	4	1	0	0	1	0	0	1	0	0	1	0	0	1	0	0	1	0	0	1	0	0	1	4	6	4	4	4	4	3	4	4	4	2	4	3	4	4	4	8	0	0	0	0	0	0
1	2	2	3	1	2	0	0	1	0	0	1	0	0	1	0	0	1	0	0	1	0	0	1	0	0	1	4	2	4	4	1	3	3	4	1	2	4	1	2	1	1	1	2
2	2	2	3	1	2	0	0	1	0	0	1	0	0	1	0	0	1	0	0	1	0	0	1	0	0	1	4	4	3	4	3	4	4	4	5	5	5	2	5	5	2	2	1
2	2	2	1	1	2	0	0	1	0	0	1	0	0	1	0	0	1	0	0	1	0	0	1	0	0	1	4	2	3	1	6	1	1	1	1	3	4	1	4	2	1	1	1
2	2	2	2	1	2	0	0	1	0	0	1	0	0	1	0	0	1	0	0	1	0	0	1	0	0	1	4	3	3	3	4	2	3	3	4	4	2	2	4	2	2	2	1
2	2	2	3	1	2	0	0	1	0	0	1	0	0	1	0	0	1	0	0	1	0	0	1	0	0	1	4	3	4	3	4	3	3	2	2	4	4	1	3	4	1	1	1
2	2	2	2	5	2	0	0	1	0	0	1	0	1	0	0	0	1	0	0	1	0	0	1	0	0	1	4	3	3	3	3	4	3	3	3	4	3	3	4	3	3	3	2
2	2	2	1	1	2	0	0	1	0	0	1	0	0	1	0	0	1	0	0	1	0	0	1	0	0	1	4	5	5	5	5	6	6	5	5	5	5	2	2	2	2	2	6
2	2	1	2	2	2	0	0	1	0	0	1	0	0	1	0	0	1	0	0	1	0	0	1	0	0	1	4	1	1	1	1	1	1	1	1	3	1	1	1	1	1	1	1
2	2	2	1	7	2	0	0	1	0	0	1	0	0	1	0	0	1	0	0	1	0	0	1	0	0	1	4	4	4	3	4	4	4	3	4	2	3	1	2	2	1	2	7	0	0	0	0	0	0
2	2	2	2	1	2	0	0	1	0	0	1	0	0	1	0	0	1	0	0	1	0	0	1	0	0	1	4	1	1	1	6	2	3	1	1	3	3	3	3	3	3	3	1
2	2	2	1	1	2	0	0	1	0	0	1	0	0	1	0	0	1	0	0	1	0	0	1	0	0	1	4	2	4	2	2	5	3	3	3	4	3	1	4	2	1	1	1
1	1	1	2	5	2	0	0	1	0	0	1	0	0	1	0	0	1	0	0	1	0	0	1	0	0	1	4	2	2	2	6	5	3	3	3	3	3	3	3	3	3	3	1
1	1	1	1	1	2	0	0	1	0	0	1	0	0	1	0	0	1	0	0	1	0	0	1	0	0	1	1	6	6	5	6	6	2	1	4	5	5	1	5	4	1	1	7	0	1	0	1	1	1
2	2	2	1	1	2	0	0	1	0	0	1	0	0	1	0	0	1	0	0	1	0	0	1	0	0	1	4	1	1	1	1	1	1	1	1	1	1	1	1	1	1	1	2
2	2	2	1	1	2	0	0	1	0	0	1	0	0	1	0	0	1	0	0	1	0	0	1	0	0	1	4	3	3	2	4	3	4	2	2	4	4	2	4	4	2	2	1
1	1	2	4	1	2	0	0	1	0	0	1	0	0	1	0	0	1	0	0	1	0	0	1	0	0	1	2	2	2	2	2	2	2	1	1	1	5	1	1	3	1	1	6
1	3	3	1	1	2	0	0	1	0	0	1	0	0	1	0	0	1	0	0	1	0	0	1	0	0	1	4	1	1	1	6	1	1	1	1	3	4	1	2	1	1	1	1
2	2	2	2	1	2	0	0	1	0	0	1	0	0	1	0	0	1	0	0	1	0	0	1	0	0	1	4	4	5	4	6	5	2	1	2	2	3	1	4	3	1	1	1
3	3	3	3	5	2	1	0	0	0	0	1	0	0	1	0	0	1	1	0	0	0	0	1	0	0	1	4	4	4	4	4	3	4	3	3	5	5	3	5	4	3	3	7	0	0	0	0	1	0
3	3	3	2		2	0	0	1	0	0	1	0	0	1	0	0	1	0	0	1	0	0	1	0	0	1	4	4	5	4	6	4	3	2	4	5	5	3	4	4	2	3	7	0	0	0	0	0	1
2	2	2	2	1	2	1	0	0	0	0	1	1	0	0	0	0	1	1	0	0	0	0	1	1	0	0	4	3	4	2	4	4	3	3	2	3	2	1	1	1	1	1	1
2	2	2	3	1	2	0	0	1	0	0	1	0	0	1	0	0	1	0	0	1	0	0	1	0	0	1	4	3	4	2	1	4	3	3	1	5	3	1	4	3	1	1	2
1	2	2	2	6	2	0	0	1	0	0	1	0	0	1	0	0	1	0	0	1	0	0	1	0	0	1	4	5	5	2	4	6	6	1	4	5	4	1	4	1	1	1	1
1	2	2	3		2	0	0	1	0	0	1	0	0	1	0	0	1	0	0	1	0	0	1	0	0	1	4	4	5	4	4	4	4	3	3	4	4	2	4	4	2	2	1
2	2	2	1	1	2	0	0	1	0	0	1	0	0	1	0	0	1	0	0	1	0	0	1	0	0	1	4	4	4	4	4	4	3	4	4	3	2	1	3	2	1	3	1
2	2	2	2	1	2	0	0	1	0	0	1	0	0	1	0	0	1	0	0	1	0	0	1	0	0	1	4	4	4	3	4	5	4	2	2	5	4	1	4	2	1	1	1
2	2	2	1	6	2	0	0	1	0	0	1	0	0	1	0	0	1	0	0	1	0	0	1	0	0	1	4	3	4	3	5	4	3	4	4	4	3	1	4	2	1	1	6
3	3	3	1		2	0	0	1	0	0	1	0	0	1	0	0	1	0	0	1	0	0	1	0	0	1	4	1	1	1	2	2	3	1	2	3	2	1	3	2	3	2	1
2	2	2	2	2	1	1	0	0	0	1	0	0	1	0	0	1	0	1	0	0	1	0	0	1	0	0	1	3	2	4	2	2	2	4	2	3	1	2	2	1	2	1	2
3	1	3	3	6	1	0	0	1	0	0	1	0	0	1	0	0	1	0	0	1	0	0	1	0	0	1	4	1	3	2	2	3	1	1	3	4	3	1	4	1	1	1	8	0	1	0	0	0	1
3	3	3	2		2	0	0	1	0	0	1	0	0	1	0	0	1	0	0	1	0	0	1	0	0	1	4	2	4	3	4	3	5	2	2	4	3	3	4	3	2	2	1
1	2	2	3	3	2	0	0	1	0	0	1	0	0	1	0	0	1	0	0	1	0	0	1	0	0	1	4	5	4	4	4	5	3	3	3	4	2	3	4	3	2	2	1
2	2	2	2	1	2	0	0	1	0	0	1	0	0	1	0	0	1	0	0	1	0	0	1	0	0	1	4	4	4	4	4	4	4	4	4	4	4	2	3	3	2	2	1
2	2	2	2	1	2	0	0	1	0	0	1	0	0	1	0	0	1	0	0	1	0	0	1	0	0	1	4	2	4	3	3	3	3	3	3	4	4	2	4	4	2	2	1
3	3	2	1	5	2	0	0	1	0	0	1	0	0	1	0	0	1	0	0	1	0	0	1	0	0	1	4	5	5	5	5	5	5	4	4	5	4	3	4	4	1	1	7	0	1	1	1	1	0
2	2	2	2	5	2	0	0	1	0	0	1	0	0	1	0	0	1	0	0	1	0	0	1	0	0	1	4	3	3	3	3	3	3	3	3	3	3	3	3	3	3	2	1
1	3	3	1	4	2	0	0	1	0	0	1	0	0	1	0	0	1	0	0	1	0	0	1	0	0	1	4	2	2	2	5	5	2	2	2	5	5	1	4	2	1	1	1
2	2	3	3	4	2	0	1	0	0	1	0	0	0	1	0	0	1	0	0	1	0	0	1	0	0	1	4	2	4	4	5	5	4	6	3	3	2	4	2	2	2	4	3
2	2	2	1	5	2	0	0	1	0	0	1	0	0	1	0	0	1	0	0	1	0	0	1	0	0	1	3	3	4	4	4	4	3	1	1	4	4	2	4	4	4	2	1
1	2	2	1	1	2	0	0	1	0	0	1	0	0	1	0	0	1	0	0	1	0	0	1	0	0	1	4	2	2	2	4	4	2	4	4	4	4	1	4	1	1	1	1
2	2	2	2	3	2	0	0	1	0	0	1	0	0	1	0	0	1	0	0	1	0	0	1	0	0	1	4	2	2	2	4	4	4	2	2	3	2	2	2	2	2	2	1
2	2	2	2	1	2	0	0	1	0	0	1	0	0	1	0	0	1	0	0	1	0	0	1	0	0	1	4	3	3	3	3	3	3	3	3	3	3	1	2	3	3	2	1
2	2	2	3	1	2	0	0	1	0	0	1	0	0	1	0	0	1	0	0	1	0	0	1	0	0	1	4	3	4	3	4	2	3	3	3	4	4	2	2	4	2	3	2
2	2	2	2	1	2	0	0	1	0	0	1	0	0	1	0	0	1	0	0	1	0	0	1	0	0	1	4	3	4	3	4	4	3	2	2	4	4	1	3	2	1	1	1
2	2	2	2	5	2	0	0	1	0	0	1	0	0	1	0	0	1	0	0	1	0	0	1	0	0	1	4	3	3	1	3	4	3	1	1	2	4	1	1	2	1	1	1
2	2	2	1	3	2	0	0	1	0	0	1	0	0	1	0	0	1	0	0	1	0	0	1	0	0	1	3	4	4	4	6	5	4	6	5	4	2	1	2	2	1	1	1
2	2	2	2	7	2	0	0	1	0	0	1	0	0	1	0	0	1	0	0	1	0	0	1	0	0	1	4	3	3	3	4	3	3	3	3	4	4	2	4	4	2	2	1
2	2	2	3	5	2	0	1	0	0	0	1	0	0	1	0	0	1	0	0	1	0	0	1	0	0	1	4	2	2	1	2	3	2	2	2	4	4	4	4	3	4	4	7	1	1	0	1	0	0
2	2	2	2	1	2	0	0	1	0	0	1	0	0	1	0	0	1	0	0	1	0	0	1	0	0	1	4	4	4	3	4	4	3	3	4	4	4	2	2	2	1	1	1
2	2	2	1	1	2	0	0	1	0	0	1	0	0	1	0	0	1	0	0	1	0	0	1	0	0	1	4	4	3	3	4	5	3	1	2	4	3	2	2	2	1	1	1
2	2	2	1	1	2	0	0	1	0	0	1	0	0	1	0	0	1	0	0	1	0	0	1	0	0	1	4	1	1	1	1	1	1	1	1	2	2	2	2	2	1	1	1
1	2	2	3	5	2	0	0	1	0	0	1	0	0	1	0	0	1	0	0	1	0	0	1	0	0	1	4	6	5	5	6	5	4	4	3	2	3	2	5	4	4	4	8	0	0	0	0	0	0
2	2	2	2	3	2	0	0	1	0	0	1	0	0	1	0	0	1	0	0	1	0	0	1	0	0	1	4	5	5	4	5	4	4	5	5	2	4	1	1	1	1	1	1
2	2	2	3	1	2	0	0	1	0	0	1	0	0	1	0	0	1	0	0	1	0	0	1	0	0	1	4	3	4	3	3	4	4	2	4	4	4	3	4	4	3	3	1
3	3	3	1		2	0	0	1	0	0	1	0	0	1	0	0	1	0	0	1	0	0	1	0	0	1	4	3	3	3	3	5	1	1	2	2	5	2	1	1	1	1	8	0	1	1	1	1	1
2	2	2	4	1	2	0	0	1	0	0	1	0	0	1	0	0	1	0	0	1	0	0	1	0	0	1	4	1	1	1	4	1	1	4	5	3	3	3	3	3	3	3	8	0	0	0	0	0	0
2	1	2	1	4	2	0	0	1	0	0	1	0	0	1	0	0	1	0	0	1	0	0	1	0	0	1	4	4	4	3	4	4	4	4	4	4	2	2	5	4	1	1	2
2	2	2	2	1	2	0	0	1	0	0	1	0	0	1	0	0	1	0	0	1	0	0	1	0	0	1	4	4	3	3	4	4	3	3	3	3	3	3	3	3	3	3	1
3	3	3	2		2	0	0	1	0	0	1	0	0	1	0	0	1	0	0	1	0	0	1	0	0	1	4	3	2	3	5	3	1	4	4	5	3	2	5	2	1	1	1
3	2	1	1		2	0	0	1	0	0	1	0	0	1	0	0	1	0	0	1	0	0	1	0	0	1	4	3	3	2	3	2	2	1	2	5	4	1	4	3	1	1	1
1	2	2	2	1	1	0	0	1	0	0	1	0	0	1	0	0	1	0	0	1	0	0	1	0	0	1	4	4	4	2	3	3	3	2	2	4	4	2	2	4	1	1	2
2	2	2	3	6	2	0	0	1	0	0	1	0	0	1	0	0	1	0	0	1	0	0	1	0	0	1	4	1	1	1	6	1	1	3	6	5	4	1	4	3	1	1	1
2	2	2	3	1	2	0	0	1	0	0	1	0	0	1	0	0	1	0	0	1	0	0	1	0	0	1	4	3	3	3	4	3	3	3	3	3	3	3	3	3	3	3	7	0	1	0	0	0	0
1	2	2	1	1	2	0	0	1	0	0	1	0	0	1	0	0	1	1	0	0	0	0	1	0	0	1	4	4	4	4	4	4	4	4	4	5	5	1	5	5	1	1	2
2	2	2	2	1	1	0	0	1	0	0	1	0	0	1	0	0	1	0	0	1	0	0	1	0	0	1	4	2	2	2	5	5	4	1	5	4	4	3	3	3	3	3	1
1	2	1	4	1	2	0	0	1	0	0	1	0	0	1	0	0	1	0	0	1	0	0	1	0	0	1	4	5	6	6	6	6	6	6	6	5	3	3	3	2	1	1	1
2	2	2	1	4	2	0	0	1	0	0	1	0	0	1	0	0	1	0	0	1	0	0	1	0	0	1	4	3	3	2	4	2	3	2	3	4	4	1	2	3	1	1	2
1	2	2	1	5	2	0	0	1	0	0	1	0	0	1	0	0	1	0	0	1	0	0	1	0	0	1	4	3	3	3	3	4	2	3	4	3	3	3	3	3	3	3	1
2	2	2	2	1	2	0	0	1	0	0	1	0	0	1	0	0	1	0	0	1	0	0	1	0	0	1	4	4	4	4	5	4	3	2	4	5	4	2	5	5	2	2	1
2	2	2	3	1	2	0	0	1	0	0	1	0	0	1	0	0	1	0	0	1	0	0	1	0	0	1	4	3	3	3	4	4	4	3	2	4	3	1	3	1	1	1	1
1	1	2	3	1	2	0	0	1	0	0	1	0	0	1	0	0	1	0	0	1	0	0	1	0	0	1	4	4	3	3	3	3	3	3	3	5	5	5	5	5	5	5	1
2	2	2	2	3	2	0	0	1	0	0	1	0	0	1	0	0	1	0	0	1	0	0	1	0	0	1	4	4	4	3	4	4	4	3	3	1	1	1	1	1	1	1	1
2	1	2	2	1	2	0	0	1	0	0	1	0	0	1	0	0	1	0	0	1	0	0	1	0	0	1	4	5	5	5	6	6	3	1	4	5	3	1	4	1	1	1	1
2	2	2	3	1	2	0	0	1	0	0	1	0	0	1	0	0	1	0	0	1	0	0	1	0	0	1	4	4	4	4	5	4	4	4	4	3	3	2	2	3	2	2	2
2	2	1	1		2	0	0	1	0	0	1	0	0	1	0	0	1	0	0	1	0	0	1	0	0	1	4	2	2	4	3	4	3	1	3	4	4	1	4	4	1	1	2
2	2	2	3	1	2	0	0	1	0	0	1	0	0	1	0	0	1	0	0	1	0	0	1	0	0	1	4	2	2	2	5	3	3	1	2	4	5	2	2	4	2	2	1
2	2	2	3	1	2	0	0	1	0	0	1	0	0	1	0	0	1	0	0	1	0	0	1	0	0	1	4	4	3	4	4	4	5	4	4	4	4	4	4	4	4	4	1
2	2	2	2	1	2	0	0	1	0	0	1	0	0	1	0	0	1	0	0	1	0	0	1	0	0	1	4	3	2	3	5	5	3	3	3	4	4	1	4	2	2	1	1
1	1	2	2	1	2	0	0	1	0	0	1	0	0	1	0	0	1	0	0	1	0	0	1	0	0	1	4	3	4	3	4	3	3	2	2	4	4	2	3	3	1	1	1
1	3	1	2	1	2	0	0	1	0	0	1	0	0	1	0	0	1	0	0	1	0	0	1	0	0	1	4	3	2	2	4	1	1	1	1	4	3	2	5	4	1	1	6
1	1	2	1	2	2	1	0	0	0	0	1	1	0	0	0	0	1	0	0	1	0	0	1	0	0	1	4	3	2	2	2	2	3	4	4	4	2	2	2	2	3	1	1
2	2	2	2	1	2	0	0	1	0	0	1	0	0	1	0	0	1	0	0	1	0	0	1	0	0	1	4	4	4	4	5	4	4	2	2	2	2	2	2	2	2	2	7	1	0	0	0	0	0
2	2	2	2	6	2	0	0	1	0	0	1	0	0	1	0	0	1	0	0	1	0	0	1	0	0	1	4	3	4	3	5	4	3	3	3	4	5	3	4	4	2	1	8	0	1	0	1	0	1
2	2	2	2	1	2	0	0	1	0	0	1	0	0	1	0	0	1	0	0	1	0	0	1	0	0	1	4	4	4	3	6	4	4	3	3	5	3	1	5	2	1	1	2
1	1	2	3	1	2	0	0	1	0	0	1	0	0	1	0	0	1	0	0	1	0	0	1	0	0	1	4	5	3	5	2	4	3	6	5	4	2	3	2	3	3	3	1
3	3	3	3		2	0	0	1	0	0	1	0	0	1	0	0	1	0	0	1	0	0	1	0	0	1	4	2	2	2	4	4	4	4	4	5	5	3	4	4	4	4	1
1	1	2	2		2	0	0	1	0	0	1	0	0	1	0	0	1	0	0	1	0	0	1	0	0	1	3	4	4	4	4	4	4	4	4	5	4	3	4	5	4	3	1
1	1	2	2	1	2	0	0	1	0	0	1	0	0	1	0	0	1	0	0	1	0	0	1	0	0	1	4	3	3	2	3	3	3	3	3	4	4	3	4	4	1	2	2
2	1	2	1	1	2	0	0	1	0	0	1	0	0	1	0	0	1	0	0	1	0	0	1	0	0	1	4	5	4	4	5	5	4	3	3	4	4	2	4	4	2	2	1
3	3	3	1		2	0	0	1	0	0	1	0	0	1	0	0	1	0	0	1	0	0	1	0	0	1	4	4	4	4	4	3	4	5	4	4	4	2	3	4	1	1	8	0	0	0	0	0	1
1	2	1	3	1	2	0	0	1	0	0	1	0	0	1	0	0	1	0	0	1	0	0	1	0	0	1	1	3	3	3	4	3	3	3	3	4	3	2	3	2	2	2	1
3	3	3	3		2	0	0	1	0	0	1	0	0	1	0	0	1	0	0	1	0	0	1	0	0	1	4	4	4	4	4	3	3	3	2	4	3	3	3	3	2	2	1
2	2	2	1	1	2	0	0	1	0	0	1	0	0	1	0	0	1	0	0	1	0	0	1	0	0	1	4	3	3	3	4	3	3	3	3	5	5	3	5	4	3	2	1
2	2	2	1	1	2	0	0	1	0	0	1	0	0	1	0	0	1	0	0	1	0	0	1	0	0	1	4	3	3	1	6	3	4	1	4	5	2	1	4	1	1	1	2
1	1	2	2	1	2	0	0	1	0	0	1	0	0	1	0	0	1	0	0	1	0	0	1	0	0	1	4	1	1	1	4	6	3	1	1	4	3	1	2	2	1	1	1
1	3	3	2	3	2	0	0	1	0	0	1	0	0	1	0	0	1	0	0	1	0	0	1	0	0	1	4	3	4	4	4	4	3	3	4	4	3	2	4	2	2	2	1
2	2	2	3	1	2	0	0	1	0	0	1	0	0	1	0	0	1	0	0	1	0	0	1	0	0	1	4	3	4	3	4	4	3	4	4	4	4	3	3	4	2	4	1
1	1	1	3		2	0	0	1	0	0	1	0	0	1	0	0	1	0	0	1	0	0	1	0	0	1	4	3	5	3	4	3	3	1	3	5	5	3	5	4	3	3	1
2	2	2	3	5	2	0	0	1	0	0	1	0	0	1	0	0	1	0	0	1	0	0	1	0	0	1	4	4	2	2	2	4	3	3	3	4	4	1	1	1	1	1	2
1	2	2	2	1	2	0	0	1	0	0	1	0	0	1	0	0	1	0	0	1	0	0	1	0	0	1	4	3	4	3	4	3	3	3	3	3	3	3	3	3	3	3	1
1	1	2	4	1	1	0	0	1	0	0	1	0	0	1	0	0	1	0	0	1	0	0	1	0	0	1	4	6	6	5	6	6	6	2	4	2	2	1	1	1	1	1	1
2	2	2	2	1	2	0	0	1	0	0	1	0	0	1	0	0	1	0	0	1	0	0	1	0	0	1	4	2	5	2	4	3	3	2	2	3	4	2	2	2	2	2	1
2	2	2	3	1	2	0	0	1	0	0	1	0	0	1	0	0	1	0	0	1	0	0	1	0	0	1	4	2	4	2	6	1	5	4	3	4	3	2	2	2	2	2	1
2	2	2	2	4	2	0	0	1	0	0	1	0	0	1	0	0	1	0	0	1	0	0	1	0	0	1	4	2	3	2	5	5	3	2	1	4	4	2	3	2	1	1	1
2	2	2	2	1	2	0	0	1	0	0	1	0	0	1	0	0	1	0	0	1	0	0	1	0	0	1	4	2	3	3	4	4	3	2	1	4	4	1	1	1	1	1	8	1	0	0	1	1	1
2	2	2	1	1	1	0	0	1	0	0	1	0	0	1	0	0	1	0	0	1	0	0	1	0	0	1	4	4	6	2	6	6	3	1	4	2	3	1	1	1	1	1	8	0	0	0	0	0	1
1	1	2	1	1	2	0	0	1	0	0	1	0	0	1	0	0	1	0	0	1	0	0	1	0	0	1	4	1	1	1	6	6	4	1	1	4	3	1	5	4	1	1	2
3	3	3	3		2	0	0	1	0	0	1	0	0	1	0	0	1	0	0	1	0	0	1	0	0	1	4	3	4	2	4	4	1	2	2	5	5	1	5	3	1	1	6
1	2	2	3	5	2	0	0	1	0	0	1	0	0	1	0	0	1	0	0	1	0	0	1	0	0	1	3	6	4	4	6	3	2	3	4	4	4	3	3	3	5	3	7	0	0	0	0	0	0
1	2	2	2	1	2	0	0	1	0	0	1	0	0	1	0	0	1	0	0	1	0	0	1	0	0	1	4	5	6	2	6	5	6	1	3	5	4	1	5	5	1	1	1
2	2	2	1	5	2	0	0	1	0	0	1	0	0	1	0	0	1	0	0	1	0	0	1	0	0	1	4	5	5	4	5	5	4	2	2	5	1	1	4	4	1	1	1
2	2	2	2	1	2	0	0	1	0	0	1	0	0	1	0	0	1	0	0	1	0	0	1	0	0	1	4	3	3	3	4	4	4	3	2	4	4	2	4	4	2	2	1
1	2	2	2	4	2	0	0	1	0	0	1	0	0	1	0	0	1	0	0	1	0	0	1	0	0	1	4	3	4	3	3	3	4	2	3	3	2	2	2	1	2	2	1
2	2	2	3	1	1	0	0	1	0	0	1	0	0	1	0	0	1	0	0	1	0	0	1	0	0	1	4	1	3	1	4	1	1	2	3	2	4	1	1	1	1	1	2
1	1	1	3		2	0	0	1	0	0	1	0	0	1	0	0	1	0	0	1	0	0	1	0	0	1	4	3	3	3	2	4	5	5	6	3	3	2	3	3	4	3	8	0	1	0	0	0	0
2	2	2	3	6	2	0	0	1	0	0	1	0	0	1	0	0	1	0	0	1	0	0	1	0	0	1	4	3	3	3	3	4	3	3	3	2	1	1	2	2	2	1	1
2	2	2	2	1	2	0	0	1	0	0	1	0	0	1	0	0	1	0	0	1	0	0	1	0	0	1	4	3	3	3	3	3	3	3	3	3	2	1	3	1	1	1	1
2	2	2	2	1	2	0	0	1	0	0	1	0	0	1	0	0	1	0	0	1	0	0	1	0	0	1	4	1	4	3	4	4	3	1	1	2	1	1	1	1	1	1	1
2	2	2	2	1	2	0	0	1	0	0	1	0	0	1	0	0	1	0	0	1	0	0	1	0	0	1	4	2	2	2	3	4	3	3	3	2	1	1	1	1	1	1	1
1	1	2	1	5	2	0	0	1	0	0	1	0	0	1	0	0	1	0	0	1	0	0	1	0	0	1	3	4	4	4	4	5	4	4	2	4	4	1	4	4	1	1	6
1	1	1	3	7	2	0	0	1	0	0	1	0	0	1	0	0	1	0	0	1	0	0	1	0	0	1	4	3	3	3	4	5	3	3	3	4	4	4	4	4	4	4	1
2	2	2	4	1	2	0	0	1	0	0	1	0	0	1	0	0	1	0	0	1	0	0	1	0	0	1	4	5	4	4	4	5	3	1	1	4	4	3	3	3	2	2	1
3	3	3	1		2	0	0	1	0	0	1	0	0	1	0	0	1	0	0	1	0	0	1	0	0	1	4	3	3	1	5	6	6	2	4	4	4	1	4	4	2	1	1
2	2	2	3	1	2	0	0	1	0	0	1	0	0	1	0	0	1	0	0	1	0	0	1	0	0	1	2	2	3	3	4	2	3	1	2	4	3	1	2	4	1	1	2
2	2	2	1	1	2	0	0	1	0	0	1	0	0	1	0	0	1	0	0	1	0	0	1	0	0	1	4	4	3	4	4	4	1	3	2	4	4	1	2	1	1	1	1
3	3	3	2		2	0	0	1	0	0	1	0	0	1	0	0	1	0	0	1	0	0	1	0	0	1	4	3	4	3	4	5	3	3	3	3	3	1	2	4	2	2	1
2	2	2	4	7	1	0	0	1	0	0	1	0	0	1	0	0	1	0	0	1	0	0	1	0	0	1	4	2	2	2	2	2	2	2	2	3	3	3	3	3	3	3	1
2	1	2	1	1	2	0	0	1	0	0	1	0	0	1	0	0	1	0	0	1	0	0	1	0	0	1	4	5	5	5	6	6	2	2	2	4	4	2	2	2	2	2	1
3	3	3	1		2	0	0	1	0	0	1	0	0	1	0	0	1	0	0	1	0	0	1	0	0	1	4	1	1	1	4	6	2	1	1	5	5	2	5	4	1	1	2
3	3	3	3		1	0	0	1	0	0	1	0	0	1	0	0	1	0	0	1	0	0	1	0	0	1	4	4	3	3	4	5	3	3	4	4	3	2	2	2	2	2	1
2	2	2	3	1	2	0	0	1	0	0	1	0	0	1	0	0	1	0	0	1	0	0	1	0	0	1	4	3	4	4	6	4	3	4	5	4	3	2	2	2	2	3	1
2	2	2	1	2	2	0	0	1	0	0	1	0	0	1	0	0	1	0	0	1	0	0	1	0	0	1	4	1	2	4	5	4	3	3	3	3	4	2	4	3	2	2	6
2	2	2	2	1	2	0	0	1	0	0	1	0	0	1	0	0	1	0	0	1	0	0	1	0	0	1	4	4	5	3	3	6	3	5	1	4	1	1	1	1	1	1	8	0	1	0	0	0	1
2	2	2	2		2	0	0	1	0	0	1	0	0	1	0	0	1	0	0	1	0	0	1	0	0	1	4	3	3	3	3	4	4	3	4	5	4	2	5	4	3	3	2
2	2	2	2	5	1	0	0	1	0	0	1	0	0	1	0	0	1	0	0	1	0	0	1	0	0	1	4	4	4	3	4	4	3	3	4	4	2	1	1	1	1	1	1
1	1	2	2	1	2	0	0	1	0	0	1	0	0	1	0	0	1	0	0	1	0	0	1	0	0	1	4	1	1	1	1	1	1	1	1	4	3	3	3	3	3	3	1
2	2	2	2	1	2	0	0	1	0	0	1	0	0	1	0	0	1	0	0	1	0	0	1	0	0	1	4	3	5	3	3	5	3	3	3	3	3	3	3	3	3	3	1
2	2	2	3	1	2	0	0	1	0	0	1	0	0	1	0	0	1	0	0	1	0	0	1	0	0	1	4	4	4	3	3	3	4	4	4	3	4	3	3	3	3	3	2
2	2	2	2	1	2	0	0	1	0	0	1	0	0	1	0	0	1	0	0	1	0	0	1	0	0	1	4	1	1	1	1	1	1	1	1	4	4	1	3	3	1	1	1
2	2	2	1	1	2	0	0	1	0	0	1	0	0	1	0	0	1	0	0	1	0	0	1	0	0	1	4	1	5	1	3	2	2	5	5	2	1	1	1	1	1	1	1
2	2	2	3	1	2	0	0	1	0	0	1	0	0	1	0	0	1	0	0	1	0	0	1	0	0	1	4	3	3	2	4	4	2	3	3	4	4	3	4	3	3	3	1
3	3	3	1		2	0	0	1	0	0	1	0	0	1	0	0	1	0	0	1	0	0	1	0	0	1	4	3	3	2	4	4	1	1	4	4	2	1	4	2	1	1	2
2	2	2	3	1	2	0	0	1	0	0	1	0	0	1	0	0	1	0	0	1	0	0	1	0	0	1	4	4	4	3	6	3	3	3	4	3	3	2	3	3	1	1	2
2	2	2	3	1	2	0	0	1	0	0	1	0	0	1	0	0	1	0	0	1	0	0	1	0	0	1	4	3	3	3	3	3	3	3	3	2	3	1	1	2	1	1	1
2	2	2	3	1	2	0	0	1	0	0	1	0	0	1	0	0	1	0	0	1	0	0	1	0	0	1	4	5	3	5	4	4	3	4	5	3	3	4	4	3	3	2	1
2	2	1	3	5	2	0	0	1	0	0	1	0	0	1	0	0	1	0	0	1	0	0	1	0	0	1	4	2	3	3	4	3	3	3	3	2	4	1	1	3	1	1	2
3	2	2	2	1	2	0	0	1	0	0	1	0	0	1	0	0	1	0	0	1	0	0	1	0	0	1	4	4	4	3	4	4	4	3	3	2	3	1	1	2	1	1	8	0	1	1	1	1	1
1	2	2	3	1	2	0	0	1	0	0	1	0	0	1	0	0	1	0	0	1	0	0	1	0	0	1	4	1	1	1	1	1	1	1	1	2	2	2	2	3	3	3	1
1	2	2	4	1	2	0	0	1	0	0	1	0	0	1	0	0	1	0	0	1	0	0	1	0	0	1	4	3	3	3	3	4	4	3	3	4	4	1	3	2	1	1	1
3	3	3	2		2	0	0	1	0	0	1	0	0	1	0	0	1	0	0	1	0	0	1	0	0	1	4	1	1	1	4	6	1	1	1	1	1	1	1	1	1	1	2
3	3	3	3	1	2	0	0	1	0	0	1	0	0	1	0	0	1	0	0	1	0	0	1	0	0	1	4	4	4	3	2	3	3	3	3	3	3	3	3	2	3	4	1
2	3	3	4	1	2	0	0	1	0	0	1	0	0	1	0	0	1	0	0	1	0	0	1	0	0	1	4	1	1	1	1	1	1	1	1	2	3	1	1	1	1	1	2
2	2	2	2	1	2	0	0	1	0	0	1	0	0	1	0	0	1	0	0	1	0	0	1	0	0	1	4	4	4	3	5	5	4	4	5	4	4	2	4	3	1	2	1
1	2	2	1	1	2	0	0	1	0	0	1	0	0	1	0	0	1	0	0	1	0	0	1	0	0	1	4	1	1	1	1	1	1	1	1	4	1	1	1	1	1	1	1
2	2	2	2	1	2	0	0	1	0	0	1	0	0	1	0	0	1	0	0	1	0	0	1	0	0	1	4	4	4	4	4	4	4	4	3	3	3	1	1	1	1	1	1
3	3	3	3		2	0	0	1	0	0	1	0	0	1	0	0	1	0	0	1	0	0	1	0	0	1	4	1	1	1	1	1	1	1	1	1	1	1	1	2	2	1	1
2	2	2	3	1	2	0	0	1	0	0	1	0	0	1	0	0	1	0	0	1	0	0	1	0	0	1	4	2	5	2	4	5	4	3	3	4	4	3	3	3	1	1	6
3	3	3	2		2	0	0	1	0	0	1	0	0	1	0	0	1	0	0	1	0	0	1	0	0	1	4	4	5	4	5	6	5	5	5	4	5	1	4	5	2	2	1
2	2	2	1	1	2	0	0	1	0	0	1	0	0	1	0	0	1	0	0	1	0	0	1	0	0	1	4	1	1	1	6	1	1	1	3	4	4	1	2	4	1	1	1
1	1	2	2	1	2	0	0	1	0	0	1	0	0	1	0	0	1	0	0	1	0	0	1	0	0	1	4	3	5	5	6	5	5	4	4	5	3	1	5	1	1	1	1
1	2	2	2	1	2	0	0	1	0	0	1	0	0	1	0	0	1	0	0	1	0	0	1	0	0	1	4	3	4	2	3	2	2	4	3	4	4	2	2	2	1	2	1
1	1	1	1	5	2	0	0	1	0	0	1	0	0	1	0	0	1	0	0	1	0	0	1	0	0	1	4	2	5	3	2	2	2	3	3	4	2	3	4	3	2	2	1
2	2	2	2	1	2	0	0	1	0	0	1	0	0	1	0	0	1	0	0	1	0	0	1	0	0	1	4	4	3	1	4	4	3	4	3	3	3	3	3	3	3	3	1
2	2	2	1	7	2	0	0	1	0	0	1	0	0	1	0	0	1	0	0	1	0	0	1	0	0	1	4	1	2	1	2	5	1	2	2	5	5	5	5	5	2	2	1
2	1	1	1		2	0	0	1	0	0	1	0	0	1	0	0	1	0	0	1	0	0	1	0	0	1	4	3	4	3	4	4	2	2	2	4	4	1	3	4	2	1	1
3	3	3	1		2	0	0	1	0	0	1	0	0	1	0	0	1	0	0	1	0	0	1	0	0	1	4	1	3	2	4	3	3	3	4	3	4	1	1	1	1	1	2
2	2	2	3	1	2	0	0	1	0	0	1	0	0	1	0	0	1	0	0	1	0	0	1	0	0	1	4	2	3	2	2	4	3	3	3	5	5	3	5	5	3	3	1
2	2	2	1	6	2	0	0	1	0	0	1	0	0	1	0	0	1	0	0	1	0	0	1	0	0	1	4	1	1	1	4	4	1	1	1	4	2	1	4	2	1	1	1
2	2	2	2	4	2	0	0	1	0	0	1	0	0	1	0	0	1	0	0	1	0	0	1	0	0	1	4	4	4	3	5	5	3	3	4	5	4	1	4	4	1	1	1
2	2	2	1	7	2	0	0	1	0	0	1	0	0	1	0	0	1	0	0	1	0	0	1	0	0	1	4	1	4	1	5	4	3	1	1	5	5	1	3	5	1	1	1
1	1	2	1	2	2	0	0	1	0	0	1	0	0	1	0	0	1	0	0	1	0	0	1	0	0	1	4	3	4	1	2	6	2	3	3	4	2	1	3	3	1	1	1
2	2	2	3	6	2	0	0	1	0	0	1	0	0	1	0	0	1	0	0	1	0	0	1	0	0	1	4	3	4	4	4	4	3	3	3	2	2	2	2	2	2	2	1
3	3	3	1		2	0	0	1	0	0	1	0	0	1	0	0	1	0	0	1	0	0	1	0	0	1	4	3	3	3	3	3	3	3	3	5	5	1	3	3	1	1	7	1	1	0	1	0	0
1	2	2	3	1	2	0	0	1	0	0	1	0	0	1	0	0	1	0	0	1	0	0	1	0	0	1	4	4	4	2	5	5	5	4	4	4	4	3	4	4	2	2	6
2	2	2	3	1	2	0	0	1	0	0	1	0	0	1	0	0	1	0	0	1	0	0	1	0	0	1	4	3	3	2	5	4	2	5	6	4	1	1	4	1	1	1	6
2	2	2	3	1	2	0	0	1	0	0	1	0	0	1	0	0	1	0	0	1	0	0	1	0	0	1	4	3	2	3	3	3	3	3	3	4	3	3	3	3	3	3	2
2	2	2	2	1	2	0	0	1	0	0	1	0	0	1	0	0	1	0	0	1	0	0	1	0	0	1	4	4	4	4	4	4	4	4	4	3	3	3	3	3	3	3	1
2	2	2	1	1	2	0	0	1	0	0	1	0	0	1	0	0	1	0	0	1	0	0	1	0	0	1	4	4	4	2	4	4	4	5	5	4	2	1	4	2	1	2	1
2	2	2	3	1	2	0	0	1	0	0	1	0	0	1	0	0	1	0	0	1	0	0	1	0	0	1	3	3	3	4	2	2	2	2	3	3	3	3	3	3	3	3	1
2	2	2	2	1	2	1	0	0	0	0	1	0	0	1	0	0	1	1	0	0	0	0	1	0	0	1	1	1	1	1	1	1	1	1	1	3	1	1	1	1	1	1	1
3	3	3	2		2	0	0	1	0	0	1	0	0	1	0	0	1	0	0	1	0	0	1	0	0	1	4	4	5	4	4	4	3	3	4	5	4	1	4	4	1	1	2
2	2	2	2	6	2	0	0	1	0	0	1	0	0	1	0	0	1	0	0	1	0	0	1	0	0	1	4	4	5	1	4	4	3	3	4	4	1	1	2	1	1	1	1
3	3	3	2		2	0	0	1	0	0	1	0	0	1	0	0	1	0	0	1	0	0	1	0	0	1	4	3	3	2	2	4	3	3	4	4	2	1	4	2	2	2	1
2	2	2	1	3	2	0	0	1	0	0	1	0	0	1	0	0	1	0	0	1	0	0	1	0	0	1	4	3	3	3	3	3	3	3	3	2	2	2	2	2	3	2	1
1	1	2	1	1	2	0	0	1	0	0	1	0	0	1	0	0	1	0	0	1	0	0	1	0	0	1	4	4	4	4	4	3	3	3	3	5	5	1	5	5	1	1	6
1	2	2	1	2	2	0	0	1	0	0	1	0	0	1	0	0	1	0	0	1	0	0	1	0	0	1	4	3	3	1	5	3	3	3	5	4	3	2	2	2	2	1	6
1	1	2	2	1	2	0	0	1	0	0	1	0	0	1	0	0	1	0	0	1	0	0	1	0	0	1	4	5	5	5	4	5	5	3	3	2	2	2	2	2	2	2	2
2	2	2	2	1	2	0	0	1	0	0	1	0	0	1	0	0	1	0	0	1	0	0	1	0	0	1	4	3	4	3	4	4	4	3	3	4	3	3	4	2	2	2	1
2	2	2	3	1	2	0	0	1	0	0	1	0	0	1	0	0	1	0	0	1	0	0	1	0	0	1	4	3	3	2	6	6	4	1	2	4	4	1	4	2	1	1	2
2	2	2	1	1	2	1	0	0	0	0	1	0	0	1	0	0	1	1	0	0	0	0	1	0	0	1	4	4	5	4	4	6	5	3	6	4	5	1	4	2	1	1	1
2	2	2	3	6	1	0	0	1	0	0	1	0	0	1	0	0	1	0	0	1	0	0	1	0	0	1	4	3	3	3	3	3	3	4	3	1	5	1	1	1	1	1	8	0	0	0	0	1	1
2	2	2	3	1	2	0	0	1	0	0	1	0	0	1	0	0	1	0	0	1	0	0	1	0	0	1	4	3	3	1	3	5	1	2	6	4	4	1	5	2	1	1	2
3	3	3	1		2	0	0	1	0	0	1	0	0	1	0	0	1	0	0	1	0	0	1	0	0	1	4	5	6	5	5	6	4	2	3	4	4	3	3	4	1	1	1
2	2	2	2	1	1	0	0	1	0	0	1	0	0	1	0	0	1	0	0	1	0	0	1	0	0	1	4	3	3	3	3	3	3	3	3	3	3	3	3	3	3	3	1
2	2	2	3	3	2	1	0	0	0	0	1	0	0	1	0	0	1	1	0	0	0	0	1	0	0	1	2	4	6	5	3	3	3	2	2	4	4	1	1	1	1	1	1
2	1	2	1	1	2	1	0	0	0	0	1	0	0	1	0	0	1	1	0	0	0	0	1	0	0	1	4	1	3	1	1	4	1	1	2	3	3	1	3	1	1	1	1
3	3	3	2		2	0	0	1	0	0	1	0	0	1	0	0	1	0	0	1	0	0	1	0	0	1	4	3	3	2	3	3	3	3	3	3	3	2	3	2	2	2	1
2	2	2	2	1	2	0	0	1	0	0	1	0	0	1	0	0	1	0	0	1	0	0	1	0	0	1	4	1	3	1	3	4	3	2	3	3	3	3	3	3	2	2	8	0	1	1	0	0	0
2	2	2	2	1	2	0	0	1	0	0	1	0	0	1	0	0	1	0	0	1	0	0	1	0	0	1	4	2	2	3	2	2	4	2	2	4	3	1	2	4	1	1	1
3	3	3	3		2	0	0	1	0	0	1	0	0	1	0	0	1	0	0	1	0	0	1	0	0	1	4	3	3	3	4	4	3	3	3	3	3	1	2	2	1	1	1
2	2	2	3	1	2	0	0	1	0	0	1	0	0	1	0	0	1	0	0	1	0	0	1	0	0	1	4	3	2	2	2	5	3	4	4	4	4	1	1	2	1	1	6
1	2	2	3	1	2	0	0	1	0	0	1	0	0	1	0	0	1	0	0	1	0	0	1	0	0	1	4	2	2	2	2	2	2	2	2	4	4	2	4	3	4	2	1
2	2	2	3	1	2	0	0	1	0	0	1	0	0	1	0	0	1	0	0	1	0	0	1	0	0	1	3	3	4	3	4	4	3	3	3	4	4	4	4	4	2	2	7	1	0	0	0	0	0
3	3	3	4	1	2	0	0	1	0	0	1	0	0	1	0	0	1	0	0	1	0	0	1	0	0	1	4	6	6	6	6	3	4	4	5	4	2	5	5	1	1	4	8	0	0	0	0	0	0
1	1	1	3		2	0	0	1	0	0	1	0	0	1	0	0	1	0	0	1	0	0	1	0	0	1	3	1	1	1	1	6	3	2	3	4	3	1	4	2	1	1	1
2	2	2	1	1	1	0	0	1	0	0	1	0	0	1	0	0	1	0	0	1	0	0	1	0	0	1	4	4	4	2	4	4	3	3	3	2	4	1	2	2	1	1	1
3	3	3	3		2	0	0	1	0	0	1	0	0	1	0	0	1	0	0	1	0	0	1	0	0	1	4	3	4	3	4	4	4	3	4	5	5	1	4	2	1	1	3
1	2	2	1	3	2	0	0	1	0	0	1	0	0	1	0	0	1	0	0	1	0	0	1	0	0	1	4	4	4	3	4	3	3	2	4	4	4	2	4	3	3	2	2
2	2	2	3	2	2	0	0	1	0	0	1	0	0	1	0	0	1	0	0	1	0	0	1	0	0	1	3	1	1	1	1	1	1	1	1	5	5	1	5	1	1	1	7	1	1	0	0	0	1
1	2	2	2	1	2	0	0	1	0	0	1	0	0	1	0	0	1	0	0	1	0	0	1	0	0	1	4	4	5	3	4	3	2	3	3	3	4	1	2	2	1	1	1
1	1	2	2	7	2	0	0	1	0	0	1	0	0	1	0	0	1	0	0	1	0	0	1	0	0	1	4	1	1	1	1	1	1	1	1	2	2	2	2	2	2	2	1
1	2	2	1	1	2	0	0	1	0	0	1	0	0	1	0	0	1	0	0	1	0	0	1	0	0	1	4	3	3	3	4	2	1	2	2	4	4	3	4	4	3	3	1
3	3	3	1		2	0	0	1	0	0	1	0	0	1	0	0	1	0	0	1	0	0	1	0	0	1	4	4	4	4	4	4	4	4	4	5	4	1	2	2	1	1	6
3	3	3	2		2	0	0	1	0	0	1	0	0	1	0	0	1	0	0	1	0	0	1	0	0	1	4	3	4	3	6	3	3	3	3	5	5	1	4	4	2	2	2
2	2	2	1	1	2	0	0	1	0	0	1	0	0	1	0	0	1	0	0	1	0	0	1	0	0	1	4	1	4	1	1	1	1	1	1	4	4	1	4	1	1	1	1
2	1	2	1	1	2	0	0	1	0	0	1	0	0	1	0	0	1	0	0	1	0	0	1	0	0	1	4	4	4	2	5	4	3	3	5	4	4	3	4	4	3	4	1
1	2	2	2	1	2	0	0	1	0	0	1	0	0	1	0	0	1	0	0	1	0	0	1	0	0	1	2	3	4	3	4	2	1	1	1	2	5	3	4	4	3	3	1
3	3	3	2		2	0	0	1	0	0	1	0	0	1	0	0	1	0	0	1	0	0	1	0	0	1	4	4	4	4	4	3	3	3	3	4	3	2	3	3	2	2	1
1	2	2	1	5	2	0	0	1	0	0	1	0	0	1	0	0	1	0	0	1	0	0	1	0	0	1	4	3	4	4	5	5	4	2	2	4	3	3	3	3	3	3	2
3	3	3	2	1	2	0	0	1	0	0	1	0	0	1	0	0	1	0	0	1	0	0	1	0	0	1	4	2	2	3	4	4	3	3	3	5	4	3	5	4	2	3	1
2	3	3	2		2	0	0	1	0	0	1	0	0	1	0	0	1	0	0	1	0	0	1	0	0	1	4	5	6	3	4	3	4	4	5	3	2	1	2	1	1	1	2
2	2	2	1	1	2	0	0	1	0	0	1	0	0	1	0	0	1	0	0	1	0	0	1	0	0	1	4	4	4	1	5	6	4	2	4	1	5	1	1	2	1	1	8	0	0	0	0	0	0
2	2	2	2	1	2	0	0	1	0	0	1	0	0	1	0	0	1	0	0	1	0	0	1	0	0	1	4	4	4	4	4	4	3	4	3	3	3	1	2	3	2	2	1
2	2	2	2	3	2	0	1	0	0	0	1	0	1	0	0	1	0	1	0	0	0	0	1	0	1	0	3	6	6	3	2	5	1	4	2	4	3	2	4	3	4	3	8	0	1	0	0	0	0
3	3	3	2		2	0	0	1	0	0	1	0	0	1	0	0	1	0	0	1	0	0	1	0	0	1	4	4	4	3	4	5	4	3	4	4	5	3	4	4	1	1	8	0	1	0	0	0	0
2	2	2	1	1	2	0	0	1	0	0	1	0	0	1	0	0	1	0	0	1	0	0	1	0	0	1	4	3	3	4	4	3	3	3	4	3	3	1	3	1	1	1	2
2	2	2	1	5	2	0	0	1	0	0	1	0	0	1	0	0	1	0	0	1	0	0	1	0	0	1	4	5	4	2	5	5	3	2	2	4	4	2	4	4	2	2	7	0	1	0	0	0	0
2	2	2	3	3	2	0	0	1	0	0	1	0	0	1	0	0	1	0	0	1	0	0	1	0	0	1	4	4	5	3	3	3	3	5	3	5	4	1	5	5	2	2	6
2	1	2	4	7	2	0	0	1	0	0	1	0	0	1	0	0	1	0	0	1	0	0	1	0	0	1	4	1	1	1	4	3	2	1	1	4	4	1	3	3	1	1	6
2	2	2	3	1	2	0	0	1	0	0	1	0	0	1	0	0	1	0	0	1	0	0	1	0	0	1	4	3	4	3	4	4	4	4	4	4	4	3	3	4	2	2	1
2	2	2	2	2	2	0	0	1	0	0	1	0	0	1	0	0	1	0	0	1	0	0	1	0	0	1	4	3	3	3	4	4	4	2	4	3	3	3	3	3	1	2	6
3	3	3	2		2	0	0	1	0	0	1	0	0	1	0	0	1	0	0	1	0	0	1	0	0	1	4	3	4	5	5	5	4	3	4	4	4	2	4	3	2	2	1
2	2	2	2	1	2	0	0	1	0	0	1	0	0	1	0	0	1	0	0	1	0	0	1	0	0	1	4	3	3	2	2	3	3	1	1	4	2	1	3	2	1	1	1
3	3	3	1		2	0	0	1	0	0	1	0	0	1	0	0	1	0	0	1	0	0	1	0	0	1	4	4	4	3	3	4	3	4	4	5	5	2	3	4	1	3	7	0	1	1	0	1	1
1	1	1	3		2	0	0	1	0	0	1	0	0	1	0	0	1	0	0	1	0	0	1	0	0	1	4	4	2	2	3	5	2	1	2	3	2	1	2	1	1	1	8	0	0	0	0	0	1
3	3	3	2		2	0	0	1	0	0	1	0	0	1	0	0	1	0	0	1	0	0	1	0	0	1	4	3	4	3	4	4	4	3	3	5	5	4	5	5	4	3	6
2	2	2	1	1	2	0	0	1	0	0	1	0	0	1	0	0	1	0	0	1	0	0	1	0	0	1	4	2	2	2	5	5	5	2	2	4	2	1	1	1	1	1	1
2	1	2	3	1	1	0	0	1	0	0	1	0	0	1	0	0	1	0	0	1	0	0	1	0	0	1	4	4	5	3	5	5	4	4	3	4	3	1	4	3	1	1	1
3	3	3	2		2	0	0	1	0	0	1	0	0	1	0	0	1	0	0	1	0	0	1	0	0	1	4	2	2	1	1	1	1	1	1	5	4	3	4	4	3	3	2
1	1	2	3	1	2	0	0	1	0	0	1	0	0	1	0	0	1	0	0	1	0	0	1	0	0	1	2	2	2	2	3	3	3	3	3	4	2	2	2	3	2	2	1
3	3	3	2		2	0	0	1	0	0	1	0	0	1	0	0	1	0	0	1	0	0	1	0	0	1	4	2	4	2	4	4	2	2	3	4	4	1	4	4	1	1	1
2	2	2	2	5	2	0	0	1	0	0	1	0	0	1	0	0	1	0	0	1	0	0	1	0	0	1	4	1	4	2	6	2	2	4	5	4	5	2	4	4	2	3	1
2	2	2	2	1	1	1	0	0	0	0	1	0	0	1	1	0	0	1	0	0	0	0	1	1	0	0	4	2	3	2	4	3	3	1	1	3	3	1	3	1	1	1	2
2	2	2	2	5	2	0	0	1	0	0	1	0	0	1	0	0	1	0	0	1	0	0	1	0	0	1	4	2	2	1	5	5	3	3	2	4	4	1	4	1	1	1	8	0	0	0	1	1	1
3	3	3	2		2	0	0	1	0	0	1	0	0	1	0	0	1	0	0	1	0	0	1	0	0	1	4	3	4	3	3	4	3	3	3	4	4	2	3	4	3	3	2
2	1	2	3	1	2	0	0	1	0	0	1	0	0	1	0	0	1	0	0	1	0	0	1	0	0	1	4	3	4	3	4	4	4	3	3	1	1	1	1	1	1	1	1
3	3	3	4		1	0	0	1	0	0	1	0	0	1	0	0	1	0	0	1	0	0	1	0	0	1	4	3	3	2	3	4	6	3	3	5	4	3	5	4	2	2	1
3	3	2	1	1	1	0	0	1	0	0	1	0	0	1	0	0	1	0	0	1	0	0	1	0	0	1	4	4	4	3	3	4	5	1	2	3	3	4	4	3	3	3	1
1	2	2	1	1	2	0	0	1	0	0	1	0	0	1	0	0	1	0	0	1	0	0	1	0	0	1	4	4	4	4	4	4	4	4	4	4	4	2	2	4	4	4	1
3	3	1	3		2	0	0	1	0	0	1	0	0	1	0	0	1	0	0	1	0	0	1	0	0	1	4	4	3	3	4	5	5	5	5	5	4	2	5	4	2	2	2
2	2	2	1	1	2	0	0	1	0	0	1	0	0	1	0	0	1	0	0	1	0	0	1	0	0	1	4	1	4	1	1	4	1	1	1	3	4	1	4	1	1	1	2
3	3	3	1	1	2	0	0	1	0	0	1	0	0	1	0	0	1	0	0	1	0	0	1	0	0	1	4	3	4	4	3	4	3	3	3	4	3	1	3	4	1	1	1
1	2	2	2	1	2	0	1	0	0	1	0	0	1	0	1	0	0	1	0	0	0	1	0	1	0	0	3	4	4	4	3	2	3	2	2	4	3	2	4	2	3	1	1
3	3	3	2		2	0	0	1	0	0	1	0	0	1	0	0	1	0	0	1	0	0	1	0	0	1	4	4	4	4	4	4	4	4	4	4	4	1	4	1	1	1	6
2	2	2	4	5	1	0	0	1	0	0	1	0	0	1	0	0	1	0	0	1	0	0	1	0	0	1	4	2	2	2	2	4	4	4	4	3	3	1	3	3	3	3	1
1	1	2	2	1	2	0	0	1	0	0	1	0	0	1	0	0	1	0	0	1	0	0	1	0	0	1	4	4	4	4	4	4	5	3	4	4	2	2	4	3	2	2	1
3	3	3	3		1	0	0	1	0	0	1	0	0	1	0	0	1	0	0	1	0	0	1	0	0	1	4	4	4	4	5	4	2	4	3	5	3	1	2	4	2	2	2
2	2	2	2	1	2	0	0	1	0	0	1	0	0	1	0	0	1	0	0	1	0	0	1	0	0	1	4	3	3	3	3	3	3	3	3	5	5	4	4	4	4	4	1
1	2	2	1	1	2	0	0	1	0	0	1	0	0	1	0	0	1	0	0	1	0	0	1	0	0	1	4	4	4	4	4	4	4	4	4	4	4	3	3	3	3	3	1
3	3	3	3		2	0	0	1	0	0	1	0	0	1	0	0	1	0	0	1	0	0	1	0	0	1	2	3	4	2	6	6	6	4	6	5	4	1	2	1	1	1	1
3	3	3	1		1	0	0	1	0	0	1	0	0	1	0	0	1	0	0	1	0	0	1	0	0	1	4	4	1	1	1	6	4	6	6	5	5	1	5	4	1	1	1
2	2	2	2		2	0	0	1	0	0	1	0	0	1	0	0	1	0	0	1	0	0	1	0	0	1	4	3	3	3	4	3	3	1	2	2	2	1	2	1	1	1	2
1	2	2	1	3	2	0	0	1	0	0	1	0	0	1	0	0	1	0	0	1	0	0	1	0	0	1	3	5	4	4	5	4	4	4	4	4	3	2	4	2	2	2	1
2	2	2	2	1	2	0	0	1	0	0	1	0	0	1	0	0	1	0	0	1	0	0	1	0	0	1	3	4	4	4	4	4	4	4	4	4	4	4	4	4	4	3	7	1	1	0	0	0	0
2	2	2	1	1	2	0	0	1	0	0	1	0	0	1	0	0	1	0	0	1	0	0	1	0	0	1	4	4	4	3	3	3	3	3	3	3	3	3	3	3	3	3	7	1	0	0	0	0	0
2	2	2	1	1	2	0	0	1	0	0	1	0	0	1	0	0	1	0	0	1	0	0	1	0	0	1	4	2	4	1	4	4	3	1	3	3	4	1	2	1	1	1	1
2	2	2	2	1	2	0	0	1	0	0	1	0	0	1	0	0	1	0	0	1	0	0	1	0	0	1	4	3	3	3	3	3	3	3	3	5	5	1	5	5	3	1	1
2	2	2	3	2	2	0	0	1	0	0	1	0	0	1	0	0	1	0	0	1	0	0	1	0	0	1	4	4	4	1	1	5	1	4	4	4	2	1	3	1	1	1	1
2	2	2	2	1	2	0	0	1	0	0	1	0	0	1	0	0	1	0	0	1	0	0	1	0	0	1	4	3	3	3	3	5	4	5	3	4	2	1	3	3	1	2	1
2	2	2	1	1	2	0	0	1	0	0	1	0	0	1	0	0	1	0	0	1	0	0	1	0	0	1	4	4	5	4	6	6	6	2	5	5	5	2	4	4	1	1	1
3	3	2	1		2	0	0	1	0	0	1	0	0	1	0	0	1	0	0	1	0	0	1	0	0	1	4	4	5	3	4	4	4	1	3	4	3	1	4	2	1	1	1
1	2	1	2	1	2	0	0	1	0	0	1	0	0	1	0	0	1	0	0	1	0	0	1	0	0	1	4	1	4	1	4	5	5	1	4	4	4	1	4	4	1	1	2
2	2	2	2	1	2	0	0	1	0	0	1	0	0	1	0	0	1	0	0	1	0	0	1	0	0	1	4	3	2	2	4	3	3	3	3	3	2	2	2	3	3	3	1
2	2	2	1	1	2	0	0	1	0	0	1	0	0	1	0	0	1	0	0	1	0	0	1	0	0	1	4	4	4	4	5	4	5	5	5	5	4	1	4	2	1	1	1
2	2	2	3	1	2	0	0	1	0	0	1	0	0	1	0	0	1	0	0	1	0	0	1	0	0	1	4	6	6	6	6	6	6	6	6	5	5	5	5	5	5	5	1
2	2	2	2	1	2	0	0	1	0	0	1	0	0	1	0	0	1	0	0	1	0	0	1	0	0	1	4	3	4	3	4	3	4	5	4	3	2	1	1	2	1	1	1
1	1	2	3	5	2	0	0	1	0	0	1	0	0	1	0	0	1	0	0	1	0	0	1	0	0	1	4	3	3	3	3	3	3	5	2	5	5	2	4	5	2	4	2
2	2	2	3		2	0	0	1	0	0	1	0	0	1	0	0	1	0	0	1	0	0	1	0	0	1	4	4	4	4	2	4	4	5	4	4	4	3	4	4	4	2	8	0	0	0	0	0	0
3	3	3	1	1	2	0	0	1	0	0	1	0	0	1	0	0	1	0	0	1	0	0	1	0	0	1	4	1	6	6	6	1	1	1	6	4	3	1	4	1	1	1	1
2	2	2	2	1	1	0	0	1	0	0	1	0	0	1	0	0	1	0	0	1	0	0	1	0	0	1	4	1	4	3	4	4	3	3	3	2	2	1	2	2	1	1	1
2	2	2	1	5	1	1	0	0	0	0	1	0	1	0	1	0	0	1	0	0	1	1	0	0	0	1	3	1	4	3	5	5	3	5	6	5	4	4	5	2	3	4	1
2	2	2	2	1	2	0	0	1	0	0	1	0	0	1	0	0	1	0	0	1	0	0	1	0	0	1	4	3	4	4	3	4	4	4	3	3	3	4	3	3	1	1	1
1	2	2	1	6	2	0	0	1	0	0	1	0	0	1	0	0	1	0	0	1	0	0	1	0	0	1	4	1	4	1	1	1	3	2	1	4	4	1	2	1	1	1	1
2	2	2	2	1	1	0	0	1	0	0	1	0	0	1	0	0	1	0	0	1	0	0	1	0	0	1	4	4	4	4	5	4	4	3	4	4	4	2	2	3	2	2	1
2	2	2	2	1	2	0	0	1	0	0	1	0	0	1	0	0	1	0	0	1	0	0	1	0	0	1	4	4	5	4	5	6	4	3	5	4	5	2	4	1	1	1	1
1	1	2	1	1	2	0	0	1	0	0	1	0	0	1	0	0	1	0	0	1	0	0	1	0	0	1	4	1	4	1	1	1	1	1	1	3	3	3	3	3	3	3	1
2	2	2	1	1	2	0	0	1	0	0	1	0	0	1	0	0	1	0	0	1	0	0	1	0	0	1	4	3	3	3	4	3	3	3	3	3	3	3	3	3	1	1	1
2	2	2	3	1	2	0	0	1	0	0	1	0	0	1	0	0	1	0	0	1	0	0	1	0	0	1	4	6	2	3	4	6	3	5	3	4	3	4	3	4	3	4	1
1	3	3	2		2	0	0	1	0	0	1	0	0	1	0	0	1	0	0	1	0	0	1	0	0	1	4	2	3	2	3	4	3	3	3	4	4	2	4	4	1	2	2
1	3	3	1	4	2	1	0	0	0	0	1	1	0	0	0	0	1	1	0	0	0	0	1	0	0	1	4	4	4	3	5	4	3	1	2	4	3	1	3	1	1	1	1
1	2	2	2	4	2	0	0	1	0	0	1	0	0	1	0	0	1	0	0	1	0	0	1	0	0	1	3	4	4	3	3	3	4	4	3	4	4	3	5	4	4	4	2
2	1	1	2	3	2	0	1	0	0	1	0	1	0	0	1	0	0	0	1	0	0	1	0	0	1	0	1	3	2	2	2	3	2	3	2	2	2	2	3	2	2	3	3
2	2	2	3	1	2	0	0	1	0	0	1	0	0	1	0	0	1	0	0	1	0	0	1	0	0	1	4	1	2	1	2	2	1	5	4	2	2	1	1	1	1	1	6
2	2	2	1	3	2	0	0	1	0	0	1	0	0	1	0	0	1	0	0	1	0	0	1	0	0	1	4	5	5	4	4	4	3	2	2	4	4	2	4	4	2	2	1
2	2	1	1	1	2	0	0	1	0	0	1	0	0	1	0	0	1	0	0	1	0	0	1	0	0	1	4	3	4	3	4	3	3	2	3	4	3	1	4	3	2	3	1
2	2	2	2	3	2	0	0	1	0	0	1	0	0	1	0	0	1	0	0	1	0	0	1	0	0	1	4	5	3	3	4	3	4	3	4	4	3	3	2	3	3	3	7	0	1	0	0	0	0
1	2	2	2	5	2	0	0	1	0	0	1	0	0	1	0	0	1	0	0	1	0	0	1	0	0	1	1	2	2	2	2	4	2	1	2	4	2	1	4	2	1	2	1
2	2	2	3	1	2	0	0	1	0	0	1	0	0	1	0	0	1	0	0	1	0	0	1	0	0	1	2	4	5	3	5	4	4	2	2	4	5	3	3	4	2	2	1
2	2	2	1	1	2	0	0	1	0	0	1	0	0	1	0	0	1	0	0	1	0	0	1	0	0	1	3	3	3	5	3	4	2	3	4	4	5	2	1	2	2	1	1
2	2	2	3	1	2	0	0	1	0	0	1	0	0	1	0	0	1	0	0	1	0	0	1	0	0	1	4	3	3	3	3	4	3	4	2	3	3	2	4	2	1	1	1
2	2	2	3	4	2	0	0	1	0	0	1	0	0	1	0	0	1	0	0	1	0	0	1	0	0	1	4	3	4	2	5	3	3	2	4	4	4	2	4	2	2	2	1
2	2	2	1	1	2	0	0	1	0	0	1	0	0	1	0	0	1	0	0	1	0	0	1	0	0	1	4	3	3	3	4	3	3	3	3	4	4	2	4	4	2	3	1
2	2	2	1	1	2	0	0	1	0	0	1	0	0	1	0	0	1	0	0	1	0	0	1	0	0	1	4	3	6	2	4	6	3	4	6	4	4	1	1	2	1	1	1
2	2	2	4	1	2	0	0	1	0	0	1	0	0	1	0	0	1	0	0	1	0	0	1	0	0	1	4	6	5	5	5	2	2	1	2	3	2	3	2	2	3	4	8	0	0	0	0	0	0
2	2	2	1	1	2	0	0	1	0	0	1	0	0	1	0	0	1	0	0	1	0	0	1	0	0	1	4	3	3	3	3	3	3	3	3	5	5	2	5	3	2	2	1
2	2	2	3	4	2	0	0	1	0	0	1	0	0	1	0	0	1	0	0	1	0	0	1	0	0	1	4	4	4	4	5	2	4	1	1	3	4	2	2	4	2	2	1
2	2	2	1	1	2	0	0	1	0	0	1	0	0	1	0	0	1	0	0	1	0	0	1	0	0	1	4	2	3	3	4	3	3	3	3	4	4	3	3	3	3	3	2
2	2	2	1	7	2	0	0	1	0	0	1	0	0	1	0	0	1	0	0	1	0	0	1	0	0	1	4	4	5	2	5	5	4	4	2	5	4	2	5	4	2	2	1
2	2	2	3	1	2	0	0	1	0	0	1	0	0	1	0	0	1	0	0	1	0	0	1	0	0	1	4	2	4	2	3	5	3	3	3	2	2	2	2	2	2	2	2
1	1	2	1	1	2	0	0	1	0	0	1	0	0	1	0	0	1	0	0	1	0	0	1	0	0	1	4	3	4	3	4	6	6	2	3	4	3	1	4	3	2	2	2
2	2	2	2	7	2	0	0	1	0	0	1	0	0	1	0	0	1	0	0	1	0	0	1	0	0	1	4	1	1	1	1	4	1	1	1	4	1	1	2	1	1	1	1
3	3	3	3		1	0	0	1	0	0	1	0	0	1	0	0	1	0	0	1	0	0	1	0	0	1	4	2	4	2	6	5	1	1	1	5	3	3	5	4	1	1	1
2	2	2	1	2	2	0	0	1	0	0	1	0	0	1	0	0	1	0	0	1	0	0	1	0	0	1	4	3	3	3	3	3	3	3	3	5	4	1	4	4	2	2	1
2	3	2	2	1	2	0	0	1	0	0	1	0	0	1	0	0	1	0	0	1	0	0	1	0	0	1	4	2	4	1	4	4	4	2	2	4	3	1	2	4	1	1	1
2	2	2	2	5	2	0	0	1	0	0	1	0	0	1	0	0	1	0	0	1	0	0	1	0	0	1	4	4	4	4	4	5	3	4	4	1	1	1	1	1	1	1	7	0	0	0	0	0	0
1	1	2	2	1	2	0	0	1	0	0	1	0	0	1	0	0	1	0	0	1	0	0	1	0	0	1	4	3	3	3	3	3	3	3	3	3	3	3	3	3	4	4	1
2	2	2	2	1	2	0	0	1	0	0	1	0	0	1	0	0	1	0	0	1	0	0	1	0	0	1	4	4	4	3	3	5	4	3	3	2	2	2	2	2	2	2	7	1	0	0	0	0	0
1	2	2	1	4	1	0	0	1	0	0	1	0	0	1	0	0	1	0	0	1	0	0	1	0	0	1	4	3	4	4	4	3	3	5	6	4	4	2	3	3	2	2	1
2	2	2	3	1	2	0	0	1	0	0	1	0	0	1	0	0	1	0	0	1	0	0	1	0	0	1	4	1	1	1	2	5	1	1	1	2	1	1	1	1	1	1	1
2	2	2	1	5	2	0	0	1	0	0	1	0	0	1	0	0	1	0	0	1	0	0	1	0	0	1	4	5	5	3	5	6	5	3	3	2	1	1	1	4	1	1	1
2	2	2	2	1	2	0	0	1	0	0	1	0	0	1	0	0	1	0	0	1	0	0	1	0	0	1	4	5	5	4	5	5	5	2	2	4	4	2	4	4	1	4	6
3	3	3	2		2	0	0	1	0	0	1	0	0	1	0	0	1	1	0	0	0	0	1	0	0	1	4	4	4	3	4	6	3	1	2	4	2	1	2	1	1	1	2
2	2	2	3	1	2	0	0	1	0	0	1	0	0	1	0	0	1	0	0	1	0	0	1	0	0	1	4	2	3	1	1	3	1	1	1	5	5	1	4	3	1	1	1
2	2	2	2	4	2	0	0	1	0	0	1	0	0	1	0	0	1	0	0	1	0	0	1	0	0	1	4	4	4	4	4	4	3	4	4	4	3	2	4	2	1	1	2
3	3	3	2		2	0	0	1	0	0	1	0	0	1	0	0	1	0	0	1	0	0	1	0	0	1	4	3	3	3	6	5	3	1	4	5	5	1	5	4	1	1	2
2	2	2	2	1	2	0	0	1	0	0	1	0	0	1	0	0	1	0	0	1	0	0	1	0	0	1	4	3	3	3	4	2	4	2	3	4	3	2	3	2	1	1	1
2	2	2	3	1	2	0	0	1	0	0	1	0	0	1	0	0	1	0	0	1	0	0	1	0	0	1	4	4	3	3	4	4	4	3	4	2	2	1	1	1	1	1	8	0	1	0	0	0	0
1	1	2	1	1	2	0	0	1	0	0	1	0	0	1	0	0	1	0	0	1	0	0	1	0	0	1	4	1	1	1	2	4	3	1	2	4	3	2	3	2	2	2	2
1	2	2	3	3	2	0	0	1	0	0	1	0	0	1	0	0	1	0	0	1	0	0	1	0	0	1	1	4	3	3	4	4	4	3	4	4	4	1	3	4	1	1	1
3	3	3	2		2	0	0	1	0	0	1	0	0	1	0	0	1	0	0	1	0	0	1	0	0	1	4	3	4	3	4	6	4	4	5	5	5	1	5	2	2	1	1
3	3	3	2		2	0	0	1	0	0	1	0	0	1	0	0	1	0	0	1	0	0	1	0	0	1	4	3	3	2	2	4	3	3	2	3	3	1	2	3	1	1	1
1	2	2	2	1	2	0	0	1	0	0	1	0	0	1	0	0	1	0	0	1	0	0	1	0	0	1	4	4	4	3	4	3	3	3	3	4	4	2	4	4	3	2	1
2	2	2	1	1	2	0	0	1	0	0	1	0	0	1	0	0	1	0	0	1	0	0	1	0	0	1	4	3	2	1	2	2	3	2	3	2	3	2	2	2	1	1	1
2	2	2	1	1	2	0	0	1	0	0	1	0	0	1	0	0	1	0	0	1	0	0	1	0	0	1	4	3	3	3	5	5	3	1	1	5	4	4	4	3	2	2	1
2	1	2	1	1	2	0	0	1	0	0	1	0	0	1	0	0	1	0	0	1	0	0	1	0	0	1	4	3	3	3	3	2	2	2	2	5	2	4	3	2	2	2	6
2	2	2	2	1	2	0	0	1	0	0	1	0	0	1	0	0	1	0	0	1	0	0	1	0	0	1	4	1	1	1	6	6	6	3	3	4	2	1	4	1	1	1	1
2	2	2	3	1	2	0	0	1	0	0	1	0	0	1	0	0	1	0	0	1	0	0	1	0	0	1	4	3	3	3	2	3	3	3	3	2	3	2	2	2	2	2	7	0	0	0	0	0	1
3	3	3	3		2	0	0	1	0	0	1	0	0	1	0	0	1	0	0	1	0	0	1	0	0	1	4	3	3	1	4	4	6	3	4	4	4	1	4	3	1	1	1
2	2	2	1	1	2	0	0	1	0	0	1	0	0	1	0	0	1	0	0	1	0	0	1	0	0	1	4	3	4	3	4	4	3	2	5	4	4	3	3	3	2	2	1
2	2	2	2	1	2	0	0	1	0	0	1	0	0	1	0	0	1	0	0	1	0	0	1	0	0	1	4	1	3	3	4	4	4	4	4	4	4	2	2	3	3	3	2
2	2	2	2	1	2	0	0	1	0	0	1	0	0	1	0	0	1	0	0	1	0	0	1	0	0	1	4	2	4	2	5	5	5	1	1	4	2	1	3	1	1	1	1
1	2	2	2	1	2	0	0	1	0	0	1	0	0	1	0	0	1	0	0	1	0	0	1	0	0	1	4	6	5	4	5	6	5	4	4	3	3	3	3	3	2	2	8	0	1	1	0	0	1
3	3	3	2		2	0	0	1	0	0	1	0	0	1	0	0	1	0	0	1	0	0	1	0	0	1	4	1	1	1	4	4	3	1	2	3	3	1	3	2	1	1	1
2	2	2	2	1	2	0	0	1	0	0	1	0	0	1	0	0	1	0	0	1	0	0	1	0	0	1	4	5	4	1	5	4	2	3	6	4	3	1	4	2	1	1	2
3	3	3	2		2	0	0	1	0	0	1	0	0	1	0	0	1	0	0	1	0	0	1	0	0	1	4	3	3	3	3	3	3	3	3	3	3	1	1	3	1	1	1
2	2	2	4	1	2	0	0	1	0	0	1	0	0	1	0	0	1	0	0	1	0	0	1	0	0	1	4	3	3	3	3	3	3	2	3	3	2	1	1	3	3	3	2
1	1	2	4	1	2	0	0	1	0	0	1	0	0	1	0	0	1	0	0	1	0	0	1	0	0	1	4	4	4	3	5	6	5	5	5	5	5	5	5	5	5	5	1
2	2	2	3	1	1	0	0	1	0	0	1	0	0	1	0	0	1	0	0	1	0	0	1	0	0	1	4	2	3	3	3	4	4	2	4	3	3	1	3	4	1	1	1
3	3	3	1		2	0	0	1	0	0	1	0	0	1	0	0	1	0	0	1	0	0	1	0	0	1	4	4	4	4	4	6	4	4	5	5	5	1	5	5	1	1	6
1	3	3	3	2	2	0	0	1	0	0	1	0	0	1	0	0	1	0	0	1	0	0	1	0	0	1	4	5	4	3	4	3	3	3	3	4	4	2	4	2	2	2	8	0	1	1	1	1	1
1	2	2	1	1	2	0	0	1	0	0	1	0	0	1	0	0	1	0	0	1	0	0	1	0	0	1	4	3	3	2	3	4	3	2	3	5	4	1	5	4	1	2	1
2	2	2	2	6	2	0	0	1	0	0	1	0	0	1	0	0	1	0	0	1	0	0	1	0	0	1	4	2	2	2	4	4	4	2	2	5	3	1	5	3	1	1	1
2	2	2	2	7	2	1	0	0	0	0	1	0	0	1	0	0	1	1	0	0	0	0	1	0	0	1	4	4	4	1	4	5	5	1	3	3	2	1	2	2	1	1	2
1	1	2	3	5	2	0	1	0	0	0	1	0	1	0	0	0	1	0	1	0	0	0	1	0	0	1	3	4	4	4	4	4	4	3	3	4	4	3	3	4	3	3	1
2	2	2	2	5	2	0	0	1	0	0	1	0	0	1	0	0	1	0	0	1	0	0	1	0	0	1	4	2	3	3	3	4	3	5	5	4	4	1	4	4	3	1	1
1	2	2	1	5	2	0	0	1	0	0	1	0	0	1	0	0	1	0	0	1	0	0	1	0	0	1	4	4	4	3	5	4	3	1	2	2	3	1	2	1	1	1	2
1	2	2	3	1	2	0	0	1	0	0	1	0	0	1	0	0	1	0	0	1	0	0	1	0	0	1	4	4	4	3	4	4	4	1	1	4	4	2	3	3	2	2	1
2	2	2	2	7	2	0	0	1	0	0	1	0	0	1	0	0	1	0	0	1	0	0	1	0	0	1	4	3	3	3	3	3	3	3	3	4	4	2	4	4	2	2	1
3	3	3	3	1	2	0	0	1	0	0	1	0	0	1	0	0	1	0	0	1	0	0	1	0	0	1	4	6	6	6	6	6	6	6	6	5	5	4	5	4	1	1	6
3	3	3	2		2	0	0	1	0	0	1	0	0	1	0	0	1	0	0	1	0	0	1	0	0	1	4	2	2	2	4	3	3	2	4	4	4	1	3	2	2	2	1
2	2	2	1	1	2	0	0	1	0	0	1	0	0	1	0	0	1	0	0	1	0	0	1	0	0	1	4	2	2	2	5	2	2	1	2	4	2	1	4	2	1	1	1
1	2	2	4	1	2	0	0	1	0	0	1	0	0	1	0	0	1	0	0	1	0	0	1	0	0	1	2	1	1	1	5	3	2	3	5	4	4	1	1	2	1	1	2
2	2	2	1	1	2	0	0	1	0	0	1	0	0	1	0	0	1	0	0	1	0	0	1	0	0	1	4	2	3	3	5	5	3	3	3	2	3	1	4	2	2	2	1
2	3	1	1		2	0	0	1	0	0	1	0	0	1	0	0	1	0	0	1	0	0	1	0	0	1	4	3	1	2	3	6	1	4	4	5	4	1	5	4	1	1	1
2	2	2	2	1	2	0	0	1	0	0	1	0	0	1	0	0	1	0	0	1	0	0	1	0	0	1	4	4	5	3	3	4	3	2	4	4	4	2	2	2	2	2	6
2	2	2	3	1	2	0	0	1	0	0	1	0	0	1	0	0	1	0	0	1	0	0	1	0	0	1	4	3	4	3	4	4	3	4	4	4	3	2	3	2	2	2	1
1	1	2	4	1	2	0	0	1	0	0	1	0	0	1	0	0	1	0	0	1	0	0	1	0	0	1	4	6	4	4	4	4	5	4	3	5	5	1	3	5	1	3	1
1	2	2	2	1	2	0	0	1	0	0	1	0	0	1	0	0	1	0	0	1	0	0	1	0	0	1	4	3	3	4	4	4	3	4	4	2	4	1	4	2	1	1	1
3	3	3	3		2	0	0	1	0	0	1	0	0	1	0	0	1	0	0	1	0	0	1	0	0	1	4	3	3	2	3	5	3	3	2	4	4	1	3	2	1	1	2
3	3	3	1		2	0	0	1	0	0	1	0	0	1	0	0	1	0	0	1	0	0	1	0	0	1	4	3	2	3	6	6	6	3	5	4	4	1	4	3	1	1	6
1	2	2	1	1	2	0	0	1	0	0	1	0	0	1	0	0	1	1	0	0	0	0	1	0	0	1	4	3	3	3	4	3	3	1	3	5	4	1	5	2	1	1	2
2	2	2	3	1	2	0	0	1	0	0	1	0	0	1	0	0	1	0	0	1	0	0	1	0	0	1	4	3	3	3	3	3	3	3	3	3	3	3	4	3	3	3	1
3	3	3	1	1	2	0	0	1	0	0	1	0	0	1	0	0	1	0	0	1	0	0	1	0	0	1	4	3	4	3	3	4	3	3	3	3	4	1	2	4	1	1	7	0	1	0	0	0	0
3	3	3	2		2	0	0	1	0	0	1	0	0	1	0	0	1	0	0	1	0	0	1	0	0	1	4	3	3	3	3	3	3	3	3	5	5	5	5	5	5	3	7	0	1	0	0	0	0
2	2	2	3	1	2	0	0	1	0	0	1	0	0	1	0	0	1	0	0	1	0	0	1	0	0	1	4	3	3	3	6	6	6	3	3	2	2	1	2	2	1	1	1
1	1	2	3	1	2	0	0	1	0	0	1	0	0	1	0	0	1	0	0	1	0	0	1	0	0	1	3	4	4	3	3	3	3	3	3	4	3	4	3	3	3	4	2
2	2	2	3	2	2	0	0	1	0	0	1	0	0	1	0	0	1	0	0	1	0	0	1	0	0	1	4	4	4	2	3	3	3	3	3	5	5	3	5	4	4	4	1
2	2	2	1	1	2	0	0	1	0	0	1	0	0	1	0	0	1	0	0	1	0	0	1	0	0	1	4	4	5	4	5	3	3	4	4	4	4	1	3	3	3	3	1
3	3	3	3		1	0	0	1	0	0	1	0	0	1	0	0	1	0	0	1	0	0	1	0	0	1	4	3	4	3	4	3	3	3	3	3	3	3	3	3	3	3	7	1	1	0	0	0	0
3	3	3	3		2	0	0	1	0	0	1	0	0	1	0	0	1	0	0	1	0	0	1	0	0	1	4	4	4	3	4	4	3	4	4	4	4	2	4	3	2	2	2
2	2	2	2	1	2	0	0	1	0	0	1	0	0	1	0	0	1	0	0	1	0	0	1	0	0	1	4	3	4	3	4	5	3	4	4	4	3	2	3	3	2	2	1
1	1	2	2	1	2	0	0	1	0	0	1	0	0	1	0	0	1	0	0	1	0	0	1	0	0	1	4	3	3	3	4	6	6	1	2	1	3	1	5	4	1	1	6
1	1	2	2	1	2	0	0	1	0	0	1	0	0	1	0	0	1	0	0	1	0	0	1	0	0	1	4	6	4	4	3	5	4	3	6	5	4	3	4	3	2	2	1
2	2	2	2	1	2	0	0	1	0	0	1	0	0	1	0	0	1	0	0	1	0	0	1	0	0	1	4	3	3	2	3	5	2	2	2	4	4	2	2	4	1	1	1
2	2	2	1		2	0	0	1	0	0	1	0	0	1	0	0	1	0	0	1	0	0	1	0	0	1	4	6	6	6	6	4	5	3	4	4	3	1	4	2	1	1	7	1	0	0	0	0	0
1	2	2	3	1	1	0	0	1	0	0	1	0	0	1	0	0	1	0	0	1	0	0	1	0	0	1	4	3	5	2	5	6	1	5	2	4	4	4	4	4	4	4	1
2	2	2	2	5	2	0	0	1	0	0	1	0	0	1	0	0	1	0	0	1	0	0	1	0	0	1	4	3	3	3	3	5	3	3	4	4	4	1	4	1	2	2	1
2	2	1	2	3	2	0	0	1	0	0	1	0	0	1	0	0	1	0	0	1	0	0	1	0	0	1	2	2	3	3	3	2	4	3	4	5	4	1	5	3	2	2	2
1	1	2	1	1	2	0	0	1	0	0	1	0	0	1	0	0	1	0	0	1	0	0	1	0	0	1	4	1	6	1	5	4	3	3	2	5	4	1	5	3	1	1	2
1	2	2	3	1	2	0	0	1	0	0	1	0	0	1	0	0	1	0	0	1	0	0	1	0	0	1	4	4	3	4	3	4	4	3	3	4	4	2	4	2	2	2	1
2	2	1	2	1	2	0	0	1	0	0	1	0	0	1	0	0	1	0	0	1	0	0	1	0	0	1	4	1	3	1	2	2	1	1	1	2	3	1	1	1	1	1	2
1	2	2	2	1	2	0	0	1	0	0	1	0	0	1	0	0	1	0	0	1	0	0	1	0	0	1	4	3	3	2	4	4	3	2	2	5	2	2	5	2	2	2	1
1	2	2	1	5	2	0	0	1	0	0	1	0	0	1	0	0	1	0	0	1	0	0	1	0	0	1	4	2	2	1	4	4	4	1	1	4	3	1	4	2	1	2	1
1	2	2	2	3	2	0	0	1	0	0	1	0	0	1	0	0	1	0	0	1	0	0	1	0	0	1	4	5	5	4	6	6	4	3	4	4	3	1	3	3	1	1	1
2	2	2	3	1	2	0	0	1	0	0	1	0	0	1	0	0	1	0	0	1	0	0	1	0	0	1	4	3	3	2	6	3	4	3	4	4	4	2	4	2	2	2	1
3	3	3	2		2	0	0	1	0	0	1	0	0	1	0	0	1	0	0	1	0	0	1	0	0	1	4	5	3	1	3	2	4	2	2	4	4	1	4	4	2	2	1
2	2	2	2	1	2	0	0	1	0	0	1	0	0	1	0	0	1	0	0	1	0	0	1	0	0	1	4	3	3	3	3	3	3	3	4	3	3	3	3	3	3	3	1
3	3	3	2	1	2	0	0	1	0	0	1	0	0	1	0	0	1	0	0	1	0	0	1	0	0	1	4	1	1	1	1	1	1	1	1	4	4	4	4	3	4	3	1
2	2	2	2		2	0	0	1	0	0	1	0	0	1	0	0	1	0	0	1	0	0	1	0	0	1	4	2	3	2	4	3	3	1	1	3	4	1	3	3	1	1	1
2	1	2	1	1	2	0	0	1	0	0	1	0	0	1	0	0	1	0	0	1	0	0	1	0	0	1	4	2	1	1	6	1	1	1	1	4	4	1	1	1	1	1	1
2	2	2	2	1	2	0	0	1	0	0	1	0	0	1	0	0	1	0	0	1	0	0	1	0	0	1	4	3	3	3	4	3	4	3	4	4	2	1	3	1	1	1	1
2	2	1	1	1	2	0	0	1	0	0	1	0	0	1	0	0	1	0	0	1	0	0	1	0	0	1	4	6	6	6	6	6	6	6	6	5	5	1	1	2	2	3	2
2	2	2	2	1	2	0	0	1	0	0	1	0	0	1	0	0	1	0	0	1	0	0	1	0	0	1	4	2	5	1	4	3	2	1	1	4	4	1	1	3	1	1	1
3	3	3	3		2	0	0	1	0	0	1	0	0	1	0	0	1	0	0	1	0	0	1	0	0	1	4	3	3	3	4	4	3	1	1	5	5	1	4	2	1	2	2
3	3	3	1	1	1	0	0	1	0	0	1	0	0	1	0	0	1	0	0	1	0	0	1	0	0	1	4	2	2	2	2	2	2	2	2	3	3	3	3	3	3	3	1
2	2	2	4	1	2	0	0	1	0	0	1	0	0	1	0	0	1	0	0	1	0	0	1	0	0	1	4	3	3	3	3	3	3	3	3	4	4	4	4	4	4	4	1
2	2	2	3	1	2	0	0	1	0	0	1	0	0	1	0	0	1	0	0	1	0	0	1	0	0	1	4	6	5	5	5	4	4	5	5	4	2	2	2	2	2	2	2
2	2	2	1	2	2	0	0	1	0	0	1	0	0	1	0	0	1	0	0	1	0	0	1	0	0	1	4	4	4	3	4	3	4	4	4	5	4	4	4	4	1	1	1
2	2	2	4	1	2	0	0	1	0	0	1	0	0	1	0	0	1	0	0	1	0	0	1	0	0	1	4	3	5	4	4	4	3	3	3	5	5	4	5	4	4	4	1
2	2	2	1	1	2	0	0	1	0	0	1	0	0	1	0	0	1	0	0	1	0	0	1	0	0	1	4	1	1	1	6	1	1	1	1	3	3	3	3	3	3	3	2
2	2	2	3	1	2	0	0	1	0	0	1	0	0	1	0	0	1	0	0	1	0	0	1	0	0	1	4	3	3	3	4	4	3	2	3	4	4	2	2	3	2	2	7	1	1	0	1	0	0
2	2	2	1	1	2	0	0	1	0	0	1	0	0	1	0	0	1	0	0	1	0	0	1	0	0	1	4	2	3	2	3	6	3	4	4	4	2	1	2	1	1	1	2
1	2	2	2	6	2	0	0	1	0	0	1	0	0	1	0	0	1	0	0	1	0	0	1	0	0	1	3	4	5	5	4	3	5	5	2	4	5	3	4	4	2	2	6
2	2	2	1	1	2	0	0	1	0	0	1	0	0	1	0	0	1	0	0	1	0	0	1	0	0	1	4	4	4	4	3	3	4	1	4	5	3	2	1	1	1	1	1
3	3	3	3		1	0	0	1	0	0	1	0	0	1	0	0	1	0	0	1	0	0	1	0	0	1	4	3	3	3	3	4	4	3	3	3	2	1	3	2	2	2	2
1	2	2	2	2	2	0	0	1	0	0	1	0	0	1	0	0	1	0	0	1	0	0	1	0	0	1	4	4	5	4	3	5	4	4	4	4	4	1	3	1	1	1	1
2	2	2	2	7	2	0	0	1	0	0	1	0	0	1	0	0	1	0	0	1	0	0	1	0	0	1	4	3	4	3	3	3	4	3	4	1	1	1	1	1	1	1	7	0	1	1	1	1	1
3	3	3	1		2	0	0	1	0	0	1	0	0	1	0	0	1	0	0	1	0	0	1	0	0	1	4	3	3	3	3	3	1	1	1	4	2	2	2	2	1	1	1
3	3	3	2		2	0	0	1	0	0	1	0	0	1	0	0	1	0	0	1	0	0	1	0	0	1	4	3	4	4	3	4	4	4	4	4	2	2	3	2	2	2	2
2	2	2	1	1	2	0	0	1	0	0	1	0	0	1	0	0	1	0	0	1	0	0	1	0	0	1	4	3	3	3	3	3	3	3	3	5	4	1	4	1	1	1	1
3	3	3	3		2	0	0	1	0	0	1	0	0	1	0	0	1	0	0	1	0	0	1	0	0	1	4	3	3	3	4	2	3	1	1	5	4	2	5	4	2	2	2
3	3	3	2		2	0	0	1	0	0	1	0	0	1	0	0	1	0	0	1	0	0	1	0	0	1	4	2	2	2	2	2	2	2	2	5	3	3	3	3	3	3	1
2	2	2	1	5	2	0	0	1	0	0	1	0	0	1	0	0	1	0	0	1	0	0	1	0	0	1	4	3	3	3	5	3	5	3	4	3	3	1	1	2	1	1	6
2	3	2	3	1	2	0	0	1	0	0	1	0	0	1	0	0	1	0	0	1	0	0	1	0	0	1	4	4	4	3	6	4	3	1	1	3	3	1	3	1	1	1	1
3	3	3	3		2	0	0	1	0	0	1	0	0	1	0	0	1	0	0	1	0	0	1	0	0	1	4	3	5	1	6	4	1	1	1	2	1	1	1	1	1	1	8	0	1	1	0	0	1
2	2	2	2	1	2	0	0	1	0	0	1	0	0	1	0	0	1	0	0	1	0	0	1	0	0	1	4	3	6	4	6	5	4	1	4	5	5	4	5	5	3	4	1
1	2	2	3	7	2	0	0	1	0	0	1	0	0	1	0	0	1	0	0	1	0	0	1	0	0	1	4	1	1	1	3	6	4	3	4	3	3	3	3	3	3	3	8	1	1	1	1	1	1
2	2	2	2	7	2	0	0	1	0	0	1	0	0	1	0	0	1	0	0	1	0	0	1	0	0	1	4	3	3	3	3	3	3	3	3	3	1	1	3	1	1	1	8	0	0	0	0	1	1
2	2	2	3	1	2	0	0	1	0	0	1	0	0	1	0	0	1	0	0	1	0	0	1	0	0	1	4	1	1	1	1	1	1	1	1	3	3	3	3	3	3	3	2
2	2	2	3	1	1	0	0	1	0	0	1	0	0	1	0	0	1	0	0	1	0	0	1	0	0	1	3	3	4	4	6	6	3	2	2	3	4	1	1	1	1	1	1
3	3	3	2		2	0	0	1	0	0	1	0	0	1	0	0	1	0	0	1	0	0	1	0	0	1	4	3	5	3	3	5	3	3	3	3	4	2	2	2	2	2	1
1	2	2	2	3	2	0	0	1	0	0	1	0	0	1	0	0	1	0	0	1	0	0	1	0	0	1	4	2	3	3	4	4	3	2	3	4	4	3	4	4	2	2	2
3	3	3	2		2	0	0	1	0	0	1	0	0	1	0	0	1	0	0	1	0	0	1	0	0	1	4	3	3	3	3	3	3	3	3	5	3	3	3	2	3	3	1
3	3	2	2	1	1	0	0	1	0	0	1	0	0	1	0	0	1	0	0	1	0	0	1	0	0	1	4	1	1	1	6	4	1	1	1	4	4	1	4	2	1	1	2
2	2	2	1	1	2	0	0	1	0	0	1	0	0	1	0	0	1	0	0	1	0	0	1	0	0	1	4	3	4	3	6	6	5	3	2	4	3	1	2	1	1	1	1
3	3	1	2	3	2	0	0	1	0	0	1	0	0	1	0	0	1	0	0	1	0	0	1	0	0	1	4	4	6	2	4	4	3	3	3	4	4	1	4	4	1	1	2
2	2	2	3	1	2	0	0	1	0	0	1	0	0	1	0	0	1	0	0	1	0	0	1	0	0	1	4	4	4	4	4	4	4	4	4	3	4	2	3	2	1	1	1
2	2	2	2	6	2	0	0	1	0	0	1	0	0	1	0	0	1	0	0	1	0	0	1	0	0	1	4	3	4	3	4	5	3	5	5	3	5	4	2	5	4	4	1
2	2	2	1	1	2	0	0	1	0	0	1	0	0	1	0	0	1	0	0	1	0	0	1	0	0	1	4	4	3	3	6	5	5	2	4	4	4	2	4	2	1	1	1
3	3	3	2		2	0	0	1	0	0	1	0	0	1	0	0	1	0	0	1	0	0	1	0	0	1	4	2	5	3	4	3	3	1	1	2	2	2	4	2	1	1	1
2	2	2	2	1	2	0	0	1	0	0	1	0	0	1	0	0	1	0	0	1	0	0	1	0	0	1	4	3	4	4	4	2	4	2	4	3	3	4	3	2	3	3	1
3	3	3	2		2	0	0	1	0	0	1	0	0	1	0	0	1	0	0	1	0	0	1	0	0	1	4	3	3	3	4	4	3	3	3	4	4	1	4	2	1	1	2
2	2	2	2	3	2	0	0	1	0	0	1	0	0	1	0	0	1	0	0	1	0	0	1	0	0	1	4	2	3	3	5	4	5	2	2	3	2	1	2	1	1	1	1
2	2	2	2	1	2	0	0	1	0	0	1	0	0	1	0	0	1	0	0	1	0	0	1	0	0	1	4	3	3	2	4	3	3	3	3	4	3	2	4	3	2	2	1
2	2	2	3	1	2	0	0	1	0	0	1	0	0	1	0	0	1	0	0	1	0	0	1	0	0	1	3	2	2	2	2	2	2	2	2	4	4	4	4	4	4	4	1
2	2	2	2		2	0	0	1	0	0	1	0	0	1	0	0	1	0	0	1	0	0	1	0	0	1	4	4	3	3	5	4	4	3	3	5	4	2	3	3	2	2	1
1	2	3	2		2	0	0	1	0	0	1	0	0	1	0	0	1	0	0	1	0	0	1	0	0	1	4	3	3	3	3	3	3	3	4	4	4	1	4	2	2	2	2
3	3	3	1	1	2	0	0	1	0	0	1	0	0	1	0	0	1	0	0	1	0	0	1	0	0	1	4	1	1	1	1	6	1	4	6	2	1	1	2	1	1	1	1
2	2	2	3		2	0	0	1	0	0	1	0	0	1	0	0	1	0	0	1	0	0	1	0	0	1	4	5	4	5	5	5	5	5	4	4	4	1	1	2	1	1	1
3	3	3	1		2	0	0	1	0	0	1	0	0	1	0	0	1	0	0	1	0	0	1	0	0	1	4	4	3	3	4	5	4	2	3	4	4	1	2	1	1	1	2
3	3	3	2		2	0	0	1	0	0	1	0	0	1	0	0	1	0	0	1	0	0	1	0	0	1	4	4	5	4	4	5	3	4	4	4	4	2	4	2	1	1	1
1	2	2	3	1	2	0	0	1	0	0	1	0	0	1	0	0	1	0	0	1	0	0	1	0	0	1	4	1	2	2	3	3	3	2	3	4	4	4	3	4	1	2	2
1	1	3	1	1	2	0	0	1	0	0	1	0	0	1	0	0	1	0	0	1	0	0	1	0	0	1	4	2	4	2	4	2	2	4	4	5	4	2	2	4	1	1	1
1	2	2	1	1	2	0	0	1	0	0	1	0	0	1	0	0	1	0	0	1	0	0	1	0	0	1	4	4	4	3	3	6	3	3	3	4	1	1	1	4	1	1	6
3	3	3	1		2	0	0	1	0	0	1	0	0	1	0	0	1	0	0	1	0	0	1	0	0	1	4	3	3	4	4	3	3	3	3	2	2	2	2	2	2	2	6
3	3	3	1		2	0	0	1	0	0	1	0	0	1	0	0	1	0	0	1	0	0	1	0	0	1	4	5	5	4	5	6	3	2	4	2	2	1	3	2	2	2	8	0	0	0	0	0	0
3	3	3	4	7	2	0	0	1	0	0	1	0	0	1	0	0	1	0	0	1	0	0	1	0	0	1	4	3	3	3	4	4	3	3	3	3	3	3	3	3	3	3	1
3	3	3	1	3	2	0	0	1	0	0	1	0	0	1	0	0	1	0	0	1	0	0	1	0	0	1	4	3	4	3	4	4	3	1	1	4	3	1	2	1	1	1	1
2	2	2	1	7	2	0	0	1	0	0	1	0	0	1	0	0	1	0	0	1	0	0	1	0	0	1	4	3	4	3	4	3	3	4	3	2	2	4	2	3	2	2	1
2	2	2	2	2	2	0	0	1	0	0	1	0	0	1	0	0	1	0	0	1	0	0	1	0	0	1	4	4	3	3	3	4	3	3	3	4	4	2	2	3	2	2	1
1	2	2	1	1	2	0	0	1	0	0	1	0	0	1	0	0	1	0	0	1	0	0	1	0	0	1	4	4	4	2	4	6	5	6	6	5	5	1	4	3	1	1	2
2	2	2	2	1	2	0	0	1	0	0	1	0	0	1	0	0	1	0	0	1	0	0	1	0	0	1	4	4	4	3	4	3	3	3	3	4	4	1	4	4	2	2	6
3	1	3	3	1	1	0	0	1	0	0	1	0	0	1	0	0	1	0	0	1	0	0	1	0	0	1	1	5	3	2	6	1	1	2	5	2	5	1	1	1	1	1	1
2	2	2	2	1	1	0	0	1	0	0	1	0	0	1	0	0	1	0	0	1	0	0	1	0	0	1	4	2	2	2	2	2	2	2	2	4	2	1	1	1	1	1	1
1	2	2	3	1	1	0	0	1	0	0	1	0	0	1	0	0	1	0	0	1	0	0	1	0	0	1	4	2	2	2	3	4	3	2	4	4	4	1	4	3	1	2	2
1	1	2	4	1	2	0	0	1	0	0	1	0	0	1	0	0	1	0	0	1	0	0	1	0	0	1	4	4	4	4	4	4	4	3	3	5	4	2	4	3	1	2	1
2	2	2	1	1	2	0	0	1	0	0	1	0	0	1	0	0	1	0	0	1	0	0	1	0	0	1	4	2	4	4	6	6	6	2	5	3	3	3	3	1	1	1	6
1	2	2	2	1	2	0	0	1	0	0	1	0	0	1	0	0	1	0	0	1	0	0	1	0	0	1	4	5	4	2	2	3	3	4	4	3	4	1	3	2	1	3	7	0	0	0	0	0	0
3	3	3	1		2	0	0	1	0	0	1	0	0	1	0	0	1	0	0	1	0	0	1	0	0	1	4	6	2	3	4	2	3	1	1	5	5	2	5	5	4	2	2
2	2	2	2	1	2	0	0	1	0	0	1	0	0	1	0	0	1	0	0	1	0	0	1	0	0	1	3	4	4	4	3	5	5	5	5	3	3	2	3	3	2	2	1
2	2	2	2	5	2	0	0	1	0	0	1	0	0	1	0	0	1	0	0	1	0	0	1	0	0	1	3	1	3	1	4	5	1	1	4	2	2	1	2	2	2	2	1
1	2	2	3	1	2	0	0	1	0	0	1	0	0	1	0	0	1	0	0	1	0	0	1	0	0	1	4	4	4	3	4	4	3	3	3	3	3	3	3	3	3	3	1
1	2	2	3	3	2	0	0	1	0	0	1	0	0	1	0	0	1	0	0	1	0	0	1	0	0	1	3	2	2	2	2	4	2	4	5	3	2	1	4	2	1	1	1
2	1	2	3	1	2	0	0	1	0	0	1	0	0	1	0	0	1	0	0	1	0	0	1	0	0	1	4	4	3	3	4	5	3	3	3	2	3	1	2	2	1	1	2
2	2	2	2	1	2	0	0	1	0	0	1	0	0	1	0	0	1	0	0	1	0	0	1	0	0	1	4	4	4	2	4	1	3	1	4	4	2	1	2	1	1	1	1
1	2	2	3	5	2	0	0	1	0	0	1	0	0	1	0	0	1	0	0	1	0	0	1	0	0	1	4	5	4	3	4	4	3	2	2	4	3	1	3	2	2	2	1
2	2	2	1	1	2	0	0	1	0	0	1	0	0	1	0	0	1	0	0	1	0	0	1	0	0	1	4	2	2	2	4	6	2	2	2	2	2	2	3	2	2	2	1
2	2	2	2	3	2	0	0	1	0	0	1	0	0	1	0	0	1	0	0	1	0	0	1	0	0	1	4	3	4	3	4	4	3	4	4	4	4	2	3	3	1	1	8	0	1	0	1	0	1
2	2	2	1		2	0	0	1	0	0	1	0	0	1	0	0	1	0	0	1	0	0	1	0	0	1	4	3	4	3	4	3	3	5	1	4	4	2	4	4	4	3	1
1	2	2	1	2	2	0	0	1	0	0	1	0	0	1	0	0	1	0	0	1	0	0	1	0	0	1	4	4	5	3	4	5	3	4	5	4	4	1	3	4	1	1	1
1	2	2	1	5	2	0	0	1	0	0	1	0	0	1	0	0	1	0	0	1	0	0	1	0	0	1	4	4	5	4	4	4	4	3	2	2	3	3	4	3	3	3	1
2	2	2	3		2	0	0	1	0	0	1	0	0	1	0	0	1	0	0	1	0	0	1	0	0	1	4	1	2	1	6	1	1	1	1	3	3	2	3	2	2	2	1
2	2	2	2		2	0	0	1	0	0	1	0	0	1	0	0	1	0	0	1	0	0	1	0	0	1	4	2	2	2	6	2	5	2	4	5	5	2	4	2	1	1	2
1	2	2	2	3	2	0	0	1	0	0	1	0	0	1	0	0	1	0	0	1	0	0	1	0	0	1	4	3	4	3	4	5	4	3	3	3	4	2	2	3	2	2	1
1	2	2	4	1	2	0	0	1	0	0	1	0	0	1	0	0	1	0	0	1	0	0	1	0	0	1	2	1	6	1	1	6	1	6	6	4	1	1	5	1	2	2	1
2	2	2	1	1	2	0	0	1	0	0	1	0	0	1	0	0	1	0	0	1	0	0	1	0	0	1	4	4	4	4	5	5	3	3	3	4	3	2	3	4	2	2	2
2	2	2	1	1	2	0	0	1	0	0	1	0	0	1	0	0	1	0	0	1	0	0	1	0	0	1	4	3	4	3	5	5	4	3	5	4	4	1	3	4	1	1	1
3	3	3	2	1	2	0	0	1	0	0	1	0	0	1	0	0	1	0	0	1	0	0	1	0	0	1	4	1	1	1	1	1	1	1	1	4	4	1	5	1	1	1	1
1	2	2	3	1	2	0	0	1	0	0	1	0	0	1	0	0	1	0	0	1	0	0	1	0	0	1	4	4	4	4	5	5	4	4	5	4	1	1	4	1	1	1	1
2	2	2	3	1	2	0	0	1	0	0	1	0	0	1	0	0	1	0	0	1	0	0	1	0	0	1	4	3	4	3	3	2	2	1	1	3	3	1	3	2	1	1	1
2	2	2	1	5	2	0	0	1	0	0	1	0	0	1	0	0	1	0	0	1	0	0	1	0	0	1	4	1	6	1	6	6	6	6	6	3	3	3	3	3	3	3	2
2	2	2	1	1	2	0	0	1	0	0	1	0	0	1	0	0	1	0	0	1	0	0	1	0	0	1	4	1	1	1	4	1	1	1	1	5	3	1	4	2	1	1	1
2	2	2	2	1	2	0	0	1	0	0	1	0	0	1	0	0	1	0	0	1	0	0	1	0	0	1	4	1	4	3	2	3	3	2	3	5	3	1	3	4	2	3	1
1	2	2	1	1	2	0	0	1	0	0	1	0	0	1	0	0	1	0	0	1	0	0	1	0	0	1	4	1	1	1	3	4	1	6	6	2	4	1	2	1	1	1	2
2	2	2	2	1	2	0	0	1	0	0	1	0	0	1	0	0	1	0	0	1	0	0	1	0	0	1	4	3	4	2	3	5	5	3	4	2	2	1	2	1	1	1	2
2	2	2	2	1	2	0	0	1	0	0	1	0	0	1	0	0	1	0	0	1	0	0	1	0	0	1	4	3	4	2	3	3	3	2	2	3	4	1	2	2	2	2	1
1	1	1	2	1	2	0	0	1	0	0	1	0	0	1	0	0	1	0	0	1	0	0	1	0	0	1	4	3	6	6	6	6	3	1	1	5	5	1	5	5	2	1	2
2	2	2	2	5	2	0	0	1	0	0	1	0	0	1	0	0	1	0	0	1	0	0	1	0	0	1	4	1	4	1	1	4	1	1	1	4	4	4	4	4	4	4	2
2	2	2	1	1	2	0	0	1	0	0	1	0	0	1	0	0	1	0	0	1	0	0	1	0	0	1	4	1	2	1	2	5	2	2	3	4	4	2	1	1	1	1	6
3	3	3	2		2	0	0	1	0	0	1	0	0	1	0	0	1	0	0	1	0	0	1	0	0	1	4	2	3	2	5	1	2	2	2	4	4	2	3	3	2	3	8	0	0	1	0	0	0
2	2	2	3	1	2	0	0	1	0	0	1	0	0	1	0	0	1	0	0	1	0	0	1	0	0	1	3	5	4	3	5	3	4	3	4	3	3	4	4	4	3	4	8	1	0	0	0	0	0
2	2	2	1	1	2	0	0	1	0	0	1	0	0	1	0	0	1	0	0	1	0	0	1	0	0	1	4	1	5	1	5	5	5	1	2	1	1	1	1	1	1	1	1
2	2	2	3	1	2	0	0	1	0	0	1	0	0	1	0	0	1	0	0	1	0	0	1	0	0	1	4	3	4	3	4	5	5	4	4	4	4	2	2	2	2	2	1
1	1	2	2	1	2	0	0	1	0	0	1	0	0	1	0	0	1	0	0	1	0	0	1	0	0	1	4	4	4	3	4	2	3	4	3	4	4	3	4	3	3	3	1
2	2	2	3	6	2	0	0	1	0	0	1	0	0	1	0	0	1	0	0	1	0	0	1	0	0	1	4	3	3	3	4	6	3	3	3	4	4	2	2	3	1	1	7	0	1	0	0	0	0
3	3	3	1		2	0	0	1	0	0	1	0	0	1	0	0	1	0	0	1	0	0	1	0	0	1	4	3	4	3	4	1	3	4	4	5	5	2	5	5	3	3	1
2	3	2	3	1	2	0	0	1	0	0	1	0	0	1	0	0	1	0	0	1	0	0	1	0	0	1	4	2	3	3	4	3	3	4	3	4	4	4	3	4	2	4	2
2	2	2	1	1	2	0	0	1	0	0	1	0	0	1	0	0	1	0	0	1	0	0	1	0	0	1	4	1	2	3	6	6	3	3	3	3	2	3	3	3	2	3	1
3	3	3	2		2	0	0	1	0	0	1	0	0	1	0	0	1	0	0	1	0	0	1	0	0	1	4	4	4	4	5	5	4	3	3	4	3	1	4	2	1	1	1
3	3	3	1		2	0	0	1	0	0	1	0	0	1	0	0	1	0	0	1	0	0	1	0	0	1	4	3	4	2	2	2	2	2	2	4	3	2	4	3	3	2	2
1	2	2	2	1	2	0	0	1	0	0	1	0	0	1	0	0	1	0	0	1	0	0	1	0	0	1	4	2	2	2	5	2	2	3	3	3	2	2	2	2	2	2	1
3	3	3	2		2	0	0	1	0	0	1	0	0	1	0	0	1	0	0	1	0	0	1	0	0	1	4	2	4	4	4	4	2	1	2	2	3	1	2	3	1	1	1
2	2	2	3		2	0	0	1	0	0	1	0	0	1	0	0	1	0	0	1	0	0	1	0	0	1	4	3	1	4	4	3	4	2	3	3	3	3	3	3	3	2	4
2	2	2	3	1	2	0	0	1	0	0	1	0	0	1	0	0	1	0	0	1	0	0	1	0	0	1	4	1	1	1	6	6	1	1	1	3	1	1	5	1	1	1	1
3	3	3	2		2	0	0	1	0	0	1	0	0	1	0	0	1	0	0	1	0	0	1	0	0	1	4	3	4	1	6	1	1	2	4	4	3	1	3	3	1	1	1
1	2	2	2	1	2	0	0	1	0	0	1	0	0	1	0	0	1	0	0	1	0	0	1	0	0	1	4	1	1	1	1	1	1	1	1	5	5	3	5	3	3	3	1
1	2	2	1	1	2	0	0	1	0	0	1	0	0	1	0	0	1	0	0	1	0	0	1	0	0	1	4	1	5	2	5	6	3	1	2	4	2	1	2	1	1	1	2
3	3	3	3	7	2	0	0	1	0	0	1	0	0	1	0	0	1	0	0	1	0	0	1	0	0	1	4	3	3	4	3	3	4	3	3	3	3	3	3	3	3	3	1
2	2	2	1	1	2	0	0	1	0	0	1	0	0	1	0	0	1	0	0	1	0	0	1	0	0	1	4	4	6	4	6	6	5	2	1	5	4	1	5	3	2	1	7	0	1	0	1	1	1
2	2	2	3	1	2	0	0	1	0	0	1	0	0	1	0	0	1	0	0	1	0	0	1	0	0	1	4	3	3	3	2	5	2	3	3	2	2	2	2	2	2	2	1
1	2	2	3	1	1	0	0	1	0	0	1	0	0	1	0	0	1	0	0	1	0	0	1	0	0	1	4	3	3	3	3	3	3	3	3	5	5	3	3	3	3	3	1
1	3	2	2	1	2	0	0	1	0	0	1	0	0	1	0	0	1	0	0	1	0	0	1	0	0	1	4	1	3	2	5	4	3	1	1	5	4	1	4	1	1	1	1
2	2	2	2	2	2	0	0	1	0	0	1	0	0	1	0	0	1	0	0	1	0	0	1	0	0	1	4	5	3	3	5	2	3	5	5	4	3	5	1	4	4	4	1
2	2	2	2	1	2	0	0	1	0	0	1	0	0	1	0	0	1	0	0	1	0	0	1	0	0	1	4	4	4	4	6	6	6	3	4	4	4	2	4	4	2	2	7	1	1	0	0	0	0
2	1	2	2	1	2	0	0	1	0	0	1	0	0	1	0	0	1	0	0	1	0	0	1	0	0	1	4	3	4	3	4	4	3	3	3	4	3	2	3	3	3	2	6
2	1	2	1	1	2	0	0	1	0	0	1	0	0	1	0	0	1	0	0	1	0	0	1	0	0	1	4	2	2	2	2	2	2	2	2	4	4	4	3	4	5	4	1
2	2	2	3		2	0	0	1	0	0	1	0	0	1	0	0	1	0	0	1	0	0	1	0	0	1	4	3	4	3	4	5	3	1	2	4	3	1	4	2	1	1	1
2	2	2	2	1	2	0	0	1	0	0	1	0	0	1	0	0	1	0	0	1	0	0	1	0	0	1	4	4	2	4	4	2	4	4	4	4	4	3	3	3	3	2	1
3	3	3	3		2	0	0	1	0	0	1	0	0	1	0	0	1	0	0	1	0	0	1	0	0	1	4	3	3	2	4	4	3	1	2	5	4	1	4	4	2	1	1
3	3	3	3		2	0	0	1	0	0	1	0	0	1	0	0	1	0	0	1	0	0	1	0	0	1	4	3	4	3	3	4	3	1	2	4	4	1	2	1	1	1	8	0	1	0	1	0	0
2	2	1	4	3	2	0	0	1	0	0	1	0	0	1	0	0	1	0	0	1	0	0	1	0	0	1	4	3	3	3	3	4	3	2	3	4	4	1	4	4	2	2	1
3	3	3	1		2	0	0	1	0	0	1	0	0	1	0	0	1	0	0	1	0	0	1	0	0	1	4	1	1	1	1	4	1	1	1	3	3	1	1	1	1	1	7	0	0	0	1	0	1
3	3	3	1		2	0	0	1	0	0	1	0	0	1	0	0	1	0	0	1	0	0	1	0	0	1	4	3	3	3	4	3	4	4	3	3	2	3	3	3	3	3	1
1	2	2	2	6	2	0	0	1	0	0	1	0	0	1	0	0	1	0	0	1	0	0	1	0	0	1	4	4	4	3	6	4	3	1	2	4	4	1	4	2	2	2	8	0	0	0	0	0	0
1	3	3	1	3	2	0	0	1	0	0	1	0	0	1	0	0	1	0	0	1	0	0	1	0	0	1	4	6	6	3	3	4	4	4	4	4	3	2	2	3	2	3	1
1	1	2	3	3	2	0	0	1	0	0	1	0	0	1	0	0	1	0	0	1	0	0	1	0	0	1	4	3	3	3	4	3	3	2	2	3	3	1	2	2	1	1	1
2	2	2	4	1	2	0	0	1	0	0	1	0	0	1	0	0	1	0	0	1	0	0	1	0	0	1	4	4	4	3	6	6	6	1	1	5	5	4	5	5	3	3	1
2	2	2	4		2	0	0	1	0	0	1	0	0	1	0	0	1	0	0	1	0	0	1	0	0	1	4	6	6	6	6	6	6	6	6	3	3	3	3	3	3	3	1
1	2	2	1	1	2	0	0	1	0	0	1	0	0	1	0	0	1	0	0	1	0	0	1	0	0	1	4	2	4	3	5	5	4	2	2	4	2	2	4	2	2	2	6
2	2	2	1	1	2	0	0	1	0	0	1	0	0	1	0	0	1	0	0	1	0	0	1	0	0	1	4	3	4	3	3	4	3	4	4	3	3	3	3	3	3	3	1
2	2	2	2	7	1	0	0	1	0	0	1	0	0	1	0	0	1	0	0	1	0	0	1	0	0	1	4	3	4	3	5	4	3	4	4	4	2	2	4	2	2	2	1
2	2	2	2	1	2	0	0	1	0	0	1	0	0	1	0	0	1	0	0	1	0	0	1	0	0	1	4	5	3	4	3	4	3	4	3	3	2	3	4	3	2	3	1
1	2	2	2	4	2	0	0	1	0	0	1	0	0	1	0	0	1	0	0	1	0	0	1	0	0	1	4	4	4	3	5	4	4	2	2	4	4	1	4	2	1	1	1
3	3	3	2		2	0	0	1	0	0	1	0	0	1	0	0	1	0	0	1	0	0	1	0	0	1	4	5	4	4	5	6	3	1	4	4	5	1	2	4	1	1	2
2	2	2	1	7	2	0	1	0	0	1	0	1	0	0	0	1	0	0	1	0	1	0	0	0	1	0	3	4	1	4	3	6	5	4	4	4	3	1	3	3	4	3	8	0	1	0	0	0	0
2	2	2	2	1	2	0	0	1	0	0	1	0	0	1	0	0	1	0	0	1	0	0	1	0	0	1	4	4	4	3	6	3	3	1	3	3	3	1	3	2	1	1	1
2	2	2	1	1	2	0	0	1	0	0	1	0	0	1	0	0	1	0	0	1	0	0	1	0	0	1	4	4	5	4	5	5	5	4	4	4	4	1	2	2	2	2	8	0	0	0	1	1	0
3	3	3	2		2	0	0	1	0	0	1	0	0	1	0	0	1	0	0	1	0	0	1	0	0	1	4	3	3	3	4	3	3	3	3	5	4	2	4	3	2	2	6
3	3	3	2		2	0	0	1	0	0	1	0	0	1	0	0	1	0	0	1	0	0	1	0	0	1	4	3	3	3	3	3	3	3	3	2	2	2	2	2	2	2	1
2	2	2	2	1	2	0	0	1	0	0	1	0	0	1	0	0	1	0	0	1	0	0	1	0	0	1	4	3	4	3	4	5	3	3	4	4	4	1	4	1	1	1	2
3	3	1	3		2	0	0	1	0	0	1	0	0	1	0	0	1	0	0	1	0	0	1	0	0	1	4	3	4	3	4	4	3	3	4	5	3	1	4	3	1	2	1
1	1	2	3	1	2	0	0	1	0	0	1	0	0	1	0	0	1	0	0	1	0	0	1	0	0	1	4	3	4	3	4	6	5	6	6	4	4	2	4	4	3	2	1
2	2	2	4	1	2	0	0	1	0	0	1	0	0	1	0	0	1	0	0	1	0	0	1	0	0	1	4	3	4	4	4	4	4	4	4	4	3	3	4	4	2	2	1
1	2	2	1	1	1	0	0	1	0	0	1	0	0	1	0	0	1	0	0	1	0	0	1	0	0	1	4	4	4	4	4	2	3	3	3	4	3	1	3	1	1	1	1
2	2	2	3	1	2	0	1	0	0	1	0	0	1	0	1	0	0	0	1	0	0	1	0	0	1	0	2	5	3	2	6	4	4	4	2	3	1	3	3	3	2	4	1
3	3	3	3		1	0	0	1	0	0	1	0	0	1	0	0	1	0	0	1	0	0	1	0	0	1	4	1	4	2	6	3	4	1	2	5	5	1	4	3	1	1	2
3	3	3	1	2	2	0	0	1	0	0	1	0	0	1	0	0	1	0	0	1	0	0	1	0	0	1	4	1	1	1	1	1	1	1	1	5	4	1	1	2	2	1	7	0	1	0	0	0	0
1	1	2	2	1	2	0	0	1	0	0	1	0	0	1	0	0	1	0	0	1	0	0	1	0	0	1	4	3	4	4	3	5	5	4	5	2	4	1	2	3	1	1	1
3	3	3	3		2	0	0	1	0	0	1	0	0	1	0	0	1	0	0	1	0	0	1	0	0	1	4	2	3	3	2	2	2	1	1	4	2	1	2	1	1	1	2
2	2	2	2	5	2	0	0	1	0	0	1	0	0	1	0	0	1	0	0	1	0	0	1	0	0	1	4	4	4	3	4	4	3	3	3	4	4	2	4	4	3	3	1
1	2	2	2	1	2	0	0	1	0	0	1	0	0	1	0	0	1	0	0	1	0	0	1	0	0	1	4	2	2	1	3	4	3	3	4	3	2	1	1	1	1	1	1
1	2	2	2	5	2	0	0	1	0	0	1	0	0	1	0	0	1	0	0	1	0	0	1	0	0	1	4	4	5	3	5	4	4	1	2	4	4	2	3	2	1	2	1
2	2	2	2	1	2	0	0	1	0	0	1	0	0	1	0	0	1	0	0	1	0	0	1	0	0	1	4	3	2	2	2	2	3	2	2	4	4	4	4	4	2	2	1
2	2	2	2	3	2	0	0	1	0	0	1	0	0	1	0	0	1	0	0	1	0	0	1	0	0	1	4	2	2	2	4	4	4	4	2	3	4	3	4	4	3	3	1
2	2	2	3	1	2	0	0	1	0	0	1	0	0	1	0	0	1	0	0	1	0	0	1	0	0	1	4	6	4	5	4	4	3	4	4	3	3	3	3	3	3	3	1
1	1	2	3	1	2	0	0	1	0	0	1	0	0	1	0	0	1	0	0	1	0	0	1	0	0	1	4	3	3	3	3	4	3	3	3	3	3	3	3	3	3	3	6
1	3	1	3	1	2	0	0	1	0	0	1	0	0	1	0	0	1	0	0	1	0	0	1	0	0	1	4	4	2	3	4	5	4	2	2	2	4	1	1	1	1	1	7	0	1	0	0	0	1
1	1	2	3	4	2	0	0	1	0	0	1	0	0	1	0	0	1	0	0	1	0	0	1	0	0	1	4	2	2	3	4	5	2	2	2	4	4	2	3	3	2	2	1
2	2	2	1	1	2	0	0	1	0	0	1	0	0	1	0	0	1	0	0	1	0	0	1	0	0	1	4	3	4	4	5	5	5	3	3	4	4	1	5	1	1	1	1
2	2	2	2	1	2	0	0	1	0	0	1	0	0	1	0	0	1	0	0	1	0	0	1	0	0	1	4	3	2	2	4	4	3	4	5	2	1	1	2	2	2	2	8	0	0	1	0	0	1
2	2	2	1	1	2	0	0	1	0	0	1	0	0	1	0	0	1	0	0	1	0	0	1	0	0	1	4	5	5	5	6	6	3	5	5	3	3	2	3	3	2	2	1
2	2	2	1	1	2	0	0	1	0	0	1	0	0	1	0	0	1	0	0	1	0	0	1	0	0	1	4	4	4	2	4	5	2	2	1	1	2	1	1	1	1	1	1
1	2	2	2	1	2	0	0	1	0	0	1	0	0	1	0	0	1	0	0	1	0	0	1	0	0	1	4	1	2	2	2	2	2	2	3	4	4	1	4	4	1	1	1
2	2	1	3		2	0	0	1	0	0	1	0	0	1	0	0	1	0	0	1	0	0	1	0	0	1	4	4	4	4	4	4	4	1	1	2	5	2	1	3	1	1	8	0	0	1	0	0	1
3	3	3	2		2	0	0	1	0	0	1	0	0	1	0	0	1	0	0	1	0	0	1	0	0	1	4	2	4	2	5	5	2	2	3	5	5	1	4	4	3	4	1
2	2	2	2	4	2	0	0	1	0	0	1	0	0	1	0	0	1	0	0	1	0	0	1	0	0	1	4	2	2	1	4	2	3	2	2	4	2	1	3	4	1	1	1
2	1	1	1	1	2	0	0	1	0	0	1	0	0	1	0	0	1	0	0	1	0	0	1	0	0	1	4	3	4	3	4	3	3	1	1	4	4	1	4	2	2	1	2
2	2	2	1		2	0	0	1	0	0	1	0	0	1	0	0	1	0	0	1	0	0	1	0	0	1	4	3	3	3	4	4	3	1	3	4	2	1	2	2	1	1	1
2	2	2	3	1	2	0	0	1	0	0	1	0	0	1	0	0	1	0	0	1	0	0	1	0	0	1	4	2	2	4	2	3	2	3	2	2	3	3	3	3	3	3	2
3	1	2	1	1	2	0	0	1	0	0	1	0	0	1	0	0	1	0	0	1	0	0	1	0	0	1	4	5	5	1	6	1	1	2	4	5	5	2	5	4	1	2	7	0	1	0	0	0	0
3	3	3	2	1	2	0	0	1	0	0	1	0	0	1	0	0	1	0	0	1	0	0	1	0	0	1	4	3	3	3	4	2	4	4	4	4	4	1	2	2	1	1	7	0	1	0	1	1	1
3	3	3	2		2	0	0	1	0	0	1	0	0	1	0	0	1	0	0	1	0	0	1	0	0	1	4	4	3	3	4	2	3	2	2	5	5	3	5	5	2	2	1
2	2	2	2	1	2	0	0	1	0	0	1	0	0	1	0	0	1	0	0	1	0	0	1	0	0	1	4	3	3	2	4	3	2	1	2	5	5	1	5	1	1	1	2
2	2	2	3	1	2	0	0	1	0	0	1	0	0	1	0	0	1	0	0	1	0	0	1	0	0	1	4	2	4	3	4	4	3	3	3	3	3	1	2	2	1	1	1
3	3	3	3		2	0	0	1	0	0	1	0	0	1	0	0	1	0	0	1	0	0	1	0	0	1	4	2	2	1	5	3	2	1	2	4	2	1	4	2	2	2	1
2	2	2	3	1	2	0	0	1	0	0	1	0	0	1	0	0	1	0	0	1	0	0	1	0	0	1	4	5	5	5	5	5	5	6	5	4	4	1	1	4	2	2	8	0	0	0	0	0	0
2	2	2	2	1	2	0	0	1	0	0	1	0	0	1	0	0	1	0	0	1	0	0	1	0	0	1	4	1	6	1	3	6	3	1	3	5	5	1	5	4	1	1	1
1	1	2	2	7	1	0	0	1	0	0	1	0	0	1	0	0	1	0	0	1	0	0	1	0	0	1	4	4	4	3	5	4	5	3	3	4	3	3	3	2	2	2	1
1	1	2	2	1	2	0	0	1	0	0	1	0	0	1	0	0	1	0	0	1	0	0	1	0	0	1	2	3	3	3	3	4	4	3	3	3	5	3	4	3	3	3	6
2	2	2	3	1	2	0	0	1	0	0	1	0	0	1	0	0	1	0	0	1	0	0	1	0	0	1	4	3	3	3	3	3	3	3	3	3	3	3	3	3	3	3	1
2	2	2	2	1	2	0	0	1	0	0	1	0	0	1	0	0	1	0	0	1	0	0	1	0	0	1	4	3	3	3	3	3	3	3	3	4	4	2	3	4	2	2	1
2	2	2	1	1	2	0	0	1	0	0	1	0	0	1	0	0	1	0	0	1	0	0	1	0	0	1	4	3	3	3	5	3	4	1	3	5	5	1	5	3	2	2	1
2	2	2	2	4	2	0	0	1	0	0	1	0	0	1	0	0	1	0	0	1	0	0	1	0	0	1	4	3	4	4	5	4	4	4	4	4	4	2	3	4	2	2	1
3	3	3	1	1	2	0	0	1	0	0	1	0	0	1	0	0	1	0	0	1	0	0	1	0	0	1	4	4	4	2	2	2	2	3	4	5	4	1	5	2	1	1	1
2	2	2	3		2	0	0	1	0	0	1	0	0	1	0	0	1	0	0	1	0	0	1	0	0	1	4	3	3	4	4	3	3	3	3	5	5	3	4	4	2	4	1
2	2	2	2	1	2	0	0	1	0	0	1	0	0	1	0	0	1	0	0	1	0	0	1	0	0	1	4	5	5	3	3	3	3	3	3	5	5	4	4	4	3	3	1
2	2	2	2	1	2	0	0	1	0	0	1	0	0	1	0	0	1	0	0	1	0	0	1	0	0	1	4	4	3	3	5	4	4	3	3	4	4	2	3	4	2	2	1
1	2	2	2	6	1	0	0	1	0	1	0	0	1	0	0	1	0	1	0	0	0	0	1	0	1	0	2	4	5	2	3	6	1	1	3	3	4	4	3	3	4	5	6
2	2	2	1	6	2	0	0	1	0	0	1	0	0	1	0	0	1	0	0	1	0	0	1	0	0	1	4	3	3	4	4	4	3	3	4	4	3	2	2	4	2	2	1
2	2	2	1	1	2	0	0	1	0	0	1	0	0	1	0	0	1	0	0	1	0	0	1	0	0	1	4	1	1	1	1	1	1	1	1	3	3	3	3	3	3	3	1
2	1	1	1		2	0	0	1	0	0	1	0	0	1	0	0	1	0	0	1	0	0	1	0	0	1	4	3	3	3	3	4	3	2	4	4	4	1	4	2	1	1	7	0	1	1	1	1	0
2	2	2	3	1	2	0	0	1	0	0	1	0	0	1	0	0	1	0	0	1	0	0	1	0	0	1	4	4	3	3	5	5	5	4	4	4	3	1	3	3	1	3	1
1	2	2	1	1	2	0	0	1	0	0	1	0	0	1	0	0	1	0	0	1	0	0	1	0	0	1	4	1	3	1	6	6	1	1	1	5	4	2	4	3	2	2	2
3	3	3	2		2	0	0	1	0	0	1	0	0	1	0	0	1	0	0	1	0	0	1	0	0	1	4	5	3	3	4	4	4	3	3	3	3	1	3	1	1	1	7	0	0	0	0	0	0
2	2	2	2	1	2	0	0	1	0	0	1	0	0	1	0	0	1	0	0	1	0	0	1	0	0	1	4	1	2	1	4	1	4	1	2	3	4	1	1	1	1	1	8	0	1	0	0	1	0
2	2	2	3	1	2	0	0	1	0	0	1	0	0	1	0	0	1	0	0	1	0	0	1	0	0	1	4	1	4	1	3	2	1	5	4	2	2	1	1	1	1	1	1
2	1	2	3	1	2	0	0	1	0	0	1	0	0	1	0	0	1	0	0	1	0	0	1	0	0	1	4	1	1	1	3	3	3	3	3	3	4	2	2	3	2	2	7	1	0	0	0	0	0
2	2	2	1	1	2	0	0	1	0	0	1	0	0	1	0	0	1	0	0	1	0	0	1	0	0	1	4	4	4	4	4	3	3	4	4	4	4	4	4	4	4	4	1
2	2	2	2	5	2	0	0	1	0	0	1	0	0	1	0	0	1	0	0	1	0	0	1	0	0	1	4	2	2	2	5	3	3	3	3	2	2	2	2	2	2	2	2
2	2	2	2	5	2	0	0	1	0	0	1	0	0	1	0	0	1	1	0	0	0	0	1	0	0	1	4	6	6	5	5	3	5	6	4	5	5	5	3	5	4	5	6
1	1	2	2	1	2	0	0	1	0	0	1	0	0	1	0	0	1	0	0	1	0	0	1	0	0	1	4	4	4	3	4	3	4	2	2	5	5	2	4	4	1	2	1
3	3	3	2		2	0	0	1	0	0	1	0	0	1	0	0	1	0	0	1	0	0	1	0	0	1	4	3	3	3	3	2	4	4	3	4	4	2	3	3	3	2	6
2	2	2	1	1	2	0	0	1	0	0	1	0	0	1	0	0	1	0	0	1	0	0	1	0	0	1	4	3	3	3	3	3	3	4	3	4	4	2	4	3	2	2	1
3	3	3	2	5	2	0	0	1	0	0	1	0	0	1	0	0	1	0	0	1	0	0	1	0	0	1	4	5	5	3	1	5	1	4	5	4	1	1	4	1	1	1	1
2	2	2	2	1	2	0	0	1	0	0	1	0	0	1	0	0	1	0	0	1	0	0	1	0	0	1	4	4	4	4	4	4	4	4	4	3	3	3	3	3	3	3	7	0	1	0	0	0	0
2	2	2	2	7	2	0	0	1	0	0	1	0	0	1	0	0	1	0	0	1	0	0	1	0	0	1	4	3	3	3	3	3	3	3	3	3	4	4	3	3	3	3	1
3	2	2	3	4	2	0	1	0	0	1	0	1	0	0	0	1	0	0	0	1	0	1	0	0	0	1	3	3	3	1	2	5	2	3	5	4	3	3	3	2	4	4	1
2	2	2	2	5	2	0	0	1	0	0	1	0	0	1	0	0	1	0	0	1	0	0	1	0	0	1	4	1	1	1	1	4	1	1	1	4	3	1	4	4	2	1	2
2	2	2	2	1	2	0	0	1	0	0	1	0	0	1	0	0	1	0	0	1	0	0	1	0	0	1	4	3	4	3	4	4	4	3	3	3	3	3	3	3	3	3	8	0	1	1	0	1	1
2	2	2	2	1	2	0	0	1	0	0	1	0	0	1	0	0	1	0	0	1	0	0	1	0	0	1	4	4	6	5	6	5	5	3	3	3	3	1	3	3	2	2	1
3	3	3	2		2	0	0	1	0	0	1	0	0	1	0	0	1	0	0	1	0	0	1	0	0	1	4	4	4	4	4	4	4	2	2	5	5	3	5	5	4	4	1
3	3	3	2		2	0	0	1	0	0	1	0	0	1	0	0	1	0	0	1	0	0	1	0	0	1	4	2	3	2	5	5	4	1	6	5	4	1	4	4	1	1	1
1	2	2	3	1	2	0	0	1	0	0	1	0	0	1	0	0	1	0	0	1	0	0	1	0	0	1	4	3	3	3	4	4	3	3	2	4	4	2	4	2	2	2	1
2	2	2	2	1	2	0	0	1	0	0	1	0	0	1	0	0	1	0	0	1	0	0	1	0	0	1	4	4	5	1	4	6	4	3	4	3	2	1	1	1	1	5	2
2	2	2	3	1	2	0	0	1	0	0	1	0	0	1	0	0	1	0	0	1	0	0	1	0	0	1	4	2	2	3	2	2	3	2	2	1	1	1	1	1	1	1	2
2	2	2	1	1	2	0	0	1	0	0	1	0	0	1	0	0	1	0	0	1	0	0	1	0	0	1	4	2	3	2	4	3	3	2	3	4	4	1	4	4	1	1	1
2	2	2	4	2	2	0	0	1	0	0	1	0	0	1	0	0	1	0	0	1	0	0	1	0	0	1	4	5	5	5	4	4	4	5	3	5	2	4	3	2	3	3	1
3	3	2	1		2	0	0	1	0	0	1	0	0	1	0	0	1	0	0	1	0	0	1	0	0	1	4	3	3	3	3	6	5	1	4	5	3	3	4	3	2	2	1
2	2	2	2	1	2	0	0	1	0	0	1	0	0	1	0	0	1	0	0	1	0	0	1	0	0	1	4	3	3	3	4	4	4	4	5	2	3	1	3	2	2	2	6
2	1	1	4	5	2	0	0	1	0	0	1	0	0	1	0	0	1	0	0	1	0	0	1	0	0	1	4	4	3	3	4	4	5	3	4	4	2	4	1	3	4	2	2
2	2	2	2	1	1	0	0	1	0	0	1	0	0	1	0	0	1	0	0	1	0	0	1	0	0	1	2	4	4	3	5	4	3	3	4	4	3	2	3	2	2	2	1
3	3	3	1		1	0	0	1	0	0	1	0	0	1	0	0	1	0	0	1	0	0	1	0	0	1	3	3	3	2	4	4	3	2	4	4	3	1	4	4	1	1	1
1	2	2	3	1	2	0	0	1	0	0	1	0	0	1	0	0	1	0	0	1	0	0	1	0	0	1	4	3	3	2	4	2	2	2	2	4	2	1	2	1	1	1	7	0	0	0	0	1	1
3	3	3	2	1	2	0	0	1	0	0	1	0	0	1	0	0	1	0	0	1	0	0	1	0	0	1	4	5	5	5	5	5	5	5	5	3	3	3	3	3	3	3	1
1	1	2	2	1	2	0	0	1	0	0	1	0	0	1	0	0	1	0	0	1	0	0	1	0	0	1	4	3	3	3	3	3	2	4	3	3	3	3	3	2	2	2	7	0	0	0	0	0	0
2	2	2	2	1	2	0	0	1	0	0	1	0	0	1	0	0	1	0	0	1	0	0	1	0	0	1	4	4	4	4	4	3	3	3	4	3	4	2	3	4	2	2	1
2	2	2	2		2	0	0	1	0	0	1	0	0	1	0	0	1	0	0	1	0	0	1	0	0	1	4	4	4	3	4	4	4	3	4	3	3	3	3	3	3	3	8	0	0	0	0	0	0
3	3	3	1		2	0	0	1	0	0	1	0	0	1	0	0	1	0	0	1	0	0	1	0	0	1	4	3	4	3	3	5	4	2	2	4	3	1	4	3	1	1	2
2	2	2	2	1	2	0	0	1	0	0	1	0	0	1	0	0	1	0	0	1	0	0	1	0	0	1	4	6	5	6	5	4	5	4	3	4	1	3	2	3	2	4	1
2	2	2	1	1	1	0	0	1	0	0	1	0	0	1	0	0	1	0	0	1	0	0	1	0	0	1	4	4	6	4	6	6	6	3	3	2	3	3	2	2	1	1	1
2	2	2	2	1	2	0	0	1	0	0	1	0	0	1	0	0	1	0	0	1	0	0	1	0	0	1	3	3	3	3	6	3	3	3	3	4	4	1	1	1	1	1	1
1	2	2	2	6	2	0	0	1	0	0	1	0	0	1	0	0	1	0	0	1	0	0	1	0	0	1	4	4	3	3	4	4	5	4	4	4	4	2	2	3	1	1	1
1	2	2	2	1	2	0	0	1	0	0	1	0	0	1	0	0	1	0	0	1	0	0	1	0	0	1	4	3	3	3	3	3	3	3	3	4	3	3	4	3	2	3	1
2	2	2	2	1	2	0	0	1	0	0	1	0	0	1	0	0	1	0	0	1	0	0	1	0	0	1	4	3	3	1	6	2	3	4	4	4	5	3	3	4	3	3	2
3	3	3	3		2	0	0	1	0	0	1	0	0	1	0	0	1	0	0	1	0	0	1	0	0	1	4	4	4	4	4	4	3	2	2	5	3	1	3	1	1	1	1
3	3	3	2	1	2	0	0	1	0	0	1	0	0	1	0	0	1	0	0	1	0	0	1	0	0	1	4	2	4	3	3	3	4	4	4	4	4	1	2	2	2	2	1
2	2	2	2	1	2	0	0	1	0	0	1	0	0	1	0	0	1	0	0	1	0	0	1	0	0	1	4	6	6	6	6	6	6	6	6	5	5	5	5	5	5	5	1
3	2	2	1	1	2	0	0	1	0	0	1	0	0	1	0	0	1	0	0	1	0	0	1	0	0	1	4	1	1	1	1	1	1	1	1	2	4	3	3	3	1	1	1
2	2	2	1	1	2	0	0	1	0	0	1	0	0	1	0	0	1	0	0	1	0	0	1	0	0	1	4	1	5	1	4	3	3	3	4	4	3	1	1	1	1	1	1
2	2	2	1	1	2	0	0	1	0	0	1	0	0	1	0	0	1	0	0	1	0	0	1	0	0	1	4	4	4	2	4	4	3	4	3	4	3	1	1	4	1	1	2
2	2	2	3	1	2	0	0	1	0	0	1	0	0	1	0	0	1	0	0	1	0	0	1	0	0	1	4	3	3	3	4	3	3	3	3	5	5	1	5	4	1	1	1
2	2	2	2	2	2	0	0	1	0	0	1	0	0	1	0	0	1	0	0	1	0	0	1	0	0	1	3	4	4	4	4	4	4	3	4	2	3	3	2	2	3	3	2
2	2	2	2	1	2	0	0	1	0	0	1	0	0	1	0	0	1	0	0	1	0	0	1	0	0	1	4	3	4	5	4	4	4	3	4	4	3	2	4	2	2	2	1
2	2	2	1	5	2	0	0	1	0	0	1	0	0	1	0	0	1	0	0	1	0	0	1	0	0	1	4	2	2	1	2	3	4	2	3	3	4	1	2	2	1	1	1
2	2	2	2	1	2	0	0	1	0	0	1	0	0	1	0	0	1	0	0	1	0	0	1	0	0	1	4	4	5	5	4	4	3	4	6	3	2	1	2	1	1	1	1
3	3	3	2		2	0	0	1	0	0	1	0	0	1	0	0	1	0	0	1	0	0	1	0	0	1	4	2	3	3	4	3	3	1	1	4	4	2	2	4	2	2	1
2	2	2	4	6	2	0	0	1	0	0	1	0	0	1	0	0	1	0	0	1	0	0	1	0	0	1	4	3	2	4	2	2	3	2	2	4	4	4	2	2	2	4	2
2	2	2	1	1	2	0	0	1	0	0	1	0	0	1	0	0	1	0	0	1	0	0	1	0	0	1	4	3	4	3	6	6	6	2	3	3	4	1	4	3	1	1	1
2	2	2	3	7	1	0	0	1	0	0	1	0	0	1	0	0	1	0	0	1	0	0	1	0	0	1	4	3	3	3	6	6	3	1	2	4	3	3	4	3	3	3	6
2	2	2	3		1	0	0	1	0	0	1	0	0	1	0	0	1	0	0	1	0	0	1	0	0	1	4	3	3	3	4	4	3	1	1	4	4	1	4	2	1	1	1
2	2	2	2	5	1	0	0	1	0	0	1	0	0	1	0	0	1	0	0	1	0	0	1	0	0	1	4	3	5	4	5	4	4	3	4	2	4	1	1	2	1	2	2
2	2	2	3	1	2	0	0	1	0	0	1	0	0	1	0	0	1	0	0	1	0	0	1	0	0	1	4	3	3	3	6	3	4	2	2	4	3	1	2	1	1	1	2
1	1	1	1		2	0	0	1	0	0	1	0	0	1	0	0	1	0	0	1	0	0	1	0	0	1	4	6	6	6	6	4	6	2	5	5	5	5	5	4	4	3	6
3	3	3	1		2	0	0	1	0	0	1	0	0	1	0	0	1	0	0	1	0	0	1	0	0	1	4	3	4	6	5	5	5	4	4	5	5	1	5	4	1	1	1
1	2	2	2		2	0	0	1	0	0	1	0	0	1	0	0	1	0	0	1	0	0	1	0	0	1	4	2	3	2	2	2	1	4	4	5	3	1	5	4	1	1	1
1	2	2	1	1	2	0	0	1	0	0	1	0	0	1	0	0	1	0	0	1	0	0	1	0	0	1	4	2	2	2	6	4	3	1	2	4	4	2	3	3	2	2	1
1	2	2	2	7	2	0	0	1	0	0	1	0	0	1	0	0	1	0	0	1	0	0	1	0	0	1	4	3	4	4	6	6	4	5	6	3	2	1	2	2	1	1	2
1	2	2	1	5	2	0	0	1	0	0	1	0	0	1	0	0	1	0	0	1	0	0	1	0	0	1	4	3	3	3	3	3	3	3	3	4	4	1	4	4	1	1	2
3	3	3	2		2	0	0	1	0	0	1	0	0	1	0	0	1	0	0	1	0	0	1	0	0	1	4	3	3	3	3	4	3	1	1	4	3	2	3	1	1	1	1
2	2	2	2	1	2	0	0	1	0	0	1	0	0	1	0	0	1	0	0	1	0	0	1	0	0	1	4	3	4	3	3	3	3	3	3	4	4	1	3	2	2	2	1
2	2	2	2	5	2	0	0	1	0	0	1	0	0	1	0	0	1	0	0	1	0	0	1	0	0	1	4	3	3	3	4	3	3	3	3	3	3	3	5	3	3	3	1
1	2	1	1	7	2	0	0	1	0	0	1	0	0	1	0	0	1	0	0	1	0	0	1	0	0	1	4	4	4	4	6	6	5	4	5	4	3	2	4	3	2	2	1
2	2	2	1	1	2	0	0	1	0	0	1	0	0	1	0	0	1	0	0	1	0	0	1	0	0	1	4	3	3	3	3	4	3	2	4	4	4	1	4	4	2	2	2
1	2	2	2		2	0	0	1	0	0	1	0	0	1	0	0	1	0	0	1	0	0	1	0	0	1	4	3	4	6	5	4	2	4	3	3	4	3	4	3	3	2	8	0	1	0	0	0	1
3	3	3	3		2	0	0	1	0	0	1	0	0	1	0	0	1	0	0	1	0	0	1	0	0	1	4	2	2	2	5	2	5	1	4	3	2	2	4	3	1	1	2
2	2	2	2	1	2	0	0	1	0	0	1	0	0	1	0	0	1	0	0	1	0	0	1	0	0	1	4	1	1	1	1	1	1	1	1	2	2	2	2	2	2	2	1
2	2	2	2	3	2	0	0	1	0	0	1	0	0	1	0	0	1	0	0	1	0	0	1	0	0	1	4	3	2	2	4	5	1	3	3	4	4	1	4	2	1	1	1
1	1	3	1	1	2	0	0	1	0	0	1	0	0	1	0	0	1	0	0	1	0	0	1	0	0	1	4	1	3	3	3	4	3	3	3	5	5	1	3	3	1	1	7	0	0	0	0	0	0
[truncated: 2,394 more rows]
[truncated: 10 more columns]
