# Supplementary material for: Risk factors of self-reported physical child abuse during the COVID-19 pandemic in Japan: work-related changes in men and fear of COVID-19 in women
Source: PeerJ. 2023 May 8;11:e15346. doi: 10.7717/peerj.15346 (PMC10174052; doi:10.7717/peerj.15346)
Supplement: Supplemental Information 2 [file peerj-11-15346-s002.xlsx]

## Sheet: Table 1 減らしたver
		Self-reported physical child abuse in the past two months.
		Men		Univariate		Multivariate
	Characteristics, n (%)	Offenders (n=134)	Non-offenders (n=2034)	p value		ORs (95% CI)	p value
	Age
	20-29	6 (4.5)	99 (4.9)	0.053		Reference
	30-39	64 (47.8)	756 (37.2)			1.76 (0.68-4.55)	0.243
	40-49	56 (41.8)	948 (46.6)			1.18 (0.45-3.06)	0.739
	50-59	8 (6.0)	231 (11.4)			0.53 (0.16-1.71)	0.288
	Tendency of work from home
	None	77 (57.5)	1327 (65.2)	0.148		Reference
	1-3 days/month	16 (11.9)	212 (10.4)			1.02 (0.55-1.86)	0.962
	1-3 days/week	18 (13.4)	276 (13.6)			0.99 (0.56-1.74)	0.974
	4-7 days/week	21 (15.7)	202 (9.9)			1.81 (1.07-3.07)	0.028
	Unemployed	2 (1.5)	17 (0.8)			1.17 (0.22-6.25)	0.856
	Change of job status within a year
	Did not change	66 (49.3)	1254 (61.7)	0.036		Reference
	Work decreased	37 (27.6)	367 (18.0)			1.66 (1.07-2.59)	0.025
	Leave of absence or furlough	12 (9.0)	167 (8.2)			1.03 (0.52-2.02)	0.931
	Resigned	5 (3.7)	80 (3.9)			0.86 (0.32-2.36)	0.773
	Others	14 (10.4)	166 (8.2)			1.54 (0.81-2.91)	0.184
	Relationship with household members
	Good	33 (24.6)	647 (31.8)	0.177		Reference
	Normal	94 (70.1)	1305 (64.2)			1.57 (1.02-2.42)	0.039
	Bad	7 (5.2)	82 (4.0)			1.56 (0.64-3.82)	0.327
	Fear of COVID-19
	None	102 (76.1)	1671 (82.2)	0.083		Reference
	Strong	32 (23.9)	363 (17.8)			1.24 (0.80-1.94)	0.339
	Infection with COVID-19 within a year
	Neither myself nor household member	122 (91.0)	1971 (96.9)	0.001		Reference
	Only myself	2 (1.5)	23 (1.1)			0.89 (0.18-4.36)	0.888
	Only household member	2 (1.5)	18 (0.9)			1.47 (0.28-7.63)	0.648
	Both myself and household member	8 (6.0)	22 (1.1)			4.10 (1.47-11.40)	0.007
	Feelings of discrimination related to COVID-19
	Never	109 (81.3)	1858 (91.3)	<0.001		Reference
	Before two months ago	11 (8.2)	104 (5.1)			1.37 (0.65-2.86)	0.406
	In the past two months	14 (10.4)	72 (3.5)			1.49 (0.71-3.16)	0.296
	Willingness to receive COVID-19 vaccination
	Yes	113 (84.3)	1820 (89.5)	0.01		Reference
	No, because the license process of the vaccine is doubtful	10 (7.5)	52 (2.6)			2.85 (1.35-5.99)	0.006
	No, due to other reasons	11 (8.2)	162 (8.0)			0.91 (0.46-1.80)	0.784
	Benevolent sexism scale
	<=24	36 (26.9)	734 (36.1)	0.032		Reference
	>24	98 (73.1)	1300 (63.9)			1.65 (1.09-2.50)	0.018
	Experienced or witnessed physical abuse by parents before age of 18
	No	105 (78.4)	1919 (94.3)	<0.001		Reference
	Yes	29 (21.6)	115 (5.7)			2.96 (1.73-5.06)	<0.001
	Experienced verbal abuse by parents before the age of 18
	No	107 (79.9)	1916 (94.2)	<0.001		Reference
	Yes	27 (20.1)	118 (5.8)			2.24 (1.29-3.88)	0.004
	ORs: Odds Ratios, CI: Confidence Interval
