# Supplementary material for: Risk factors of self-reported physical child abuse during the COVID-19 pandemic in Japan: work-related changes in men and fear of COVID-19 in women
Source: PeerJ. 2023 May 8;11:e15346. doi: 10.7717/peerj.15346 (PMC10174052; doi:10.7717/peerj.15346)
Supplement: Supplemental Information 3 [file peerj-11-15346-s003.xlsx]

## Sheet: Table 1 減らしたver
		Women		Univariate		Multivariate
	Characteristics, n (%)	Offenders (n=187)	Non-offenders (n=2038)	p value		ORs (95% CI)	p value
	Age
	20-29	20 (10.7)	202 (9.9)	0.01		Reference
	30-39	98 (52.4)	854 (41.9)			1.06 (0.63-1.78)	0.836
	40-49	65 (34.8)	865 (42.4)			0.67 (0.39-1.15)	0.148
	50-59	4 (2.1)	117 (5.7)			0.29 (0.09-0.88)	0.029
	Tendency of work from home
	None	90 (48.1)	1050 (51.5)	0.798		Reference
	1-3 days/month	5 (2.7)	61 (3.0)			0.84 (0.32-2.24)	0.729
	1-3 days/week	10 (5.3)	88 (4.3)			1.23 (0.59-2.59)	0.577
	4-7 days/week	9 (4.8)	79 (3.9)			1.40 (0.67-2.95)	0.375
	Unemployed	73 (39.0)	760 (37.3)			1.09 (0.69-1.72)	0.7
	Change of job status within a year
	Did not change	67 (35.8)	813 (39.9)	0.718		Reference
	Work decreased	15 (8.0)	146 (7.2)			1.14 (0.62-2.11)	0.678
	Leave of absence or furlough	15 (8.0)	182 (8.9)			0.79 (0.42-1.45)	0.442
	Resigned	18 (9.6)	161 (7.9)			1.08 (0.59-1.97)	0.801
	Others	72 (38.5)	736 (36.1)			1.08 (0.67-1.74)	0.743
	Relationship with household members
	Good	49 (26.2)	717 (35.2)	<0.001		Reference
	Normal	120 (64.2)	1248 (61.2)			1.38 (0.97-1.98)	0.075
	Bad	18 (9.6)	73 (3.6)			3.51 (1.88-6.56)	<0.001
	Fear of COVID-19
	None	115 (61.5)	1456 (71.4)	0.006		Reference
	Strong	72 (38.5)	582 (28.6)			1.44 (1.04-2.00)	0.028
	Infection with COVID-19 within a year
	Neither myself nor household member	178 (95.2)	1997 (98.0)	0.015		Reference
	Only myself	0 (0.0)	6 (0.3)			0.00 (0.00-2.63*10299)	0.974
	Only household member	3 (1.6)	21 (1.0)			1.27 (0.36-4.56)	0.71
	Both myself and household member	6 (3.2)	14 (0.7)			3.22 (1.07-9.72)	0.038
	Feelings of discrimination related to COVID-19
	Never	169 (90.4)	1913 (93.9)	0.001		Reference
	Before two months ago	4 (2.1)	75 (3.7)			0.51 (0.18-1.46)	0.208
	In the past two months	14 (7.5)	50 (2.5)			2.08 (1.02-4.23)	0.044
	Willingness to receive COVID-19 vaccination
	Yes	166 (88.8)	1720 (84.4)	0.301		Reference
	No, because the license process of the vaccine is doubtful	6 (3.2)	78 (3.8)			0.53 (0.22-1.29)	0.164
	No, due to other reasons	15 (8.0)	240 (11.8)			0.55 (0.31-0.97)	0.037
	Benevolent sexism scale
	<=24	85 (45.5)	921 (45.2)	1		Reference
	>24	102 (54.5)	1117 (54.8)			0.98 (0.71-1.34)	0.879
	Experienced or witnessed physical abuse by parents before age of 18
	No	155 (82.9)	1884 (92.4)	<0.001		Reference
	Yes	32 (17.1)	154 (7.6)			1.39 (0.84-2.29)	0.197
	Experienced verbal abuse by parents before the age of 18
	No	124 (66.3)	1750 (85.9)	<0.001		Reference
	Yes	63 (33.7)	288 (14.1)			2.66 (1.81-3.93)	<0.001
	ORs: Odds Ratios, CI: Confidence Interval
